# Supplementary material for: Effects of rheumatoid arthritis associated transcriptional changes on osteoclast differentiation network in the synovium
Source: PeerJ. 2018 Oct 11;6:e5743. doi: 10.7717/peerj.5743 (PMC6186409; doi:10.7717/peerj.5743)
Supplement: Supplemental Information 2 — The GOBP terms highlighted in green were combined to identify the proteins that belong to NF-κB signaling pathway. The GOBP terms highlighted in blue were combined to identify the proteins that belong to TGFβ signaling pathway. The GOBP terms highlighted in pink were combined to identify the proteins that belong to TLR signaling pathway. In this table, each row signifies a particular GOBP term. The GO term name along with the GO term identifier is listed in column B. The “Count” in column C denotes the number of genes corresponding to the network proteins which belong to the GOBP term. The Entrez ID of these genes are provided in column D. The parameter in column E represents the percentage of network genes that are part of the GOBP term. “List Total” denotes the total number of network genes. “Population Total” represents the total number of genes that belong to the GOBP DIRECT category of the GO database. “Population Hits” signifies the number of the “Population Total” genes which are part of the GOMF term. The “Fold.Enrichment” column is the proportion of “Count”/“List Total” to “Population Hits”/“Population Total.” The “PValue” is the EASE score which represents the significance of obtaining “count” genes in the “List Total” for the given GOBP term which has “Population Hits” genes in the background “Population Total.” The columns termed as “Bonferroni,” “Benjamini” and “FDR” represent the adjusted Pvalue to control the effect of multiple testing. The table also includes the information about the differentially regulated genes that belong to each of the GOBP term. [file peerj-06-5743-s002.xlsx]

## Sheet: odfn
Category	Term	Count	Genes	Percent of List genes in Count	List.Total	Pop.Total	Pop.Hits	Fold.Enrichment	PValue	Bonferroni	Benjamini	FDR	upgenes	# up genes	downgenes	# downgenes
GOTERM_BP_DIRECT	GO:0050852~T cell receptor signaling pathway	57	7535, 5063, 1147, 10892, 940, 8767, 84433, 5062, 10616, 50943, 3635, 5588, 5170, 3551, 6885, 9402, 8454, 8631, 4790, 4792, 5594, 4690, 8517, 3265, 5970, 8945, 5663, 27040, 3702, 6500, 7189, 3458, 23291, 7334, 919, 7335, 23118, 1445, 5728, 55072, 9564, 916, 5058, 6233, 55824, 5290, 5291, 3937, 5293, 5335, 5336, 8915, 2534, 3932, 5295, 5296, 2533	13.4434	424	16792	148	15.2528	2.67068e-51	9.18715e-48	9.18715e-48	4.88231e-48	7535, 940, 3635, 5594, 27040, 3702, 1445, 916, 55824, 3937, 5293, 5336, 3932, 2533	14	4792	1
GOTERM_BP_DIRECT	GO:0038095~Fc-epsilon receptor signaling pathway	58	3725, 1147, 257397, 10892, 6464, 84433, 5062, 6416, 2207, 5601, 5602, 5588, 4214, 5609, 7409, 5170, 3551, 6885, 9402, 7410, 4893, 8454, 2885, 5595, 4790, 5879, 4792, 6654, 5594, 8517, 3265, 5599, 5970, 9846, 8945, 27040, 3702, 6500, 7189, 23291, 6850, 7334, 7335, 23118, 5058, 6233, 5290, 5291, 3937, 5335, 5336, 8915, 10454, 4773, 2353, 4067, 5295, 5296	13.6792	424	16792	178	12.9046	2.03083e-47	6.98604e-44	3.49302e-44	3.71258e-44	2207, 2885, 5594, 27040, 3702, 6850, 3937, 5336, 4067	9	3725, 4792	2
GOTERM_BP_DIRECT	GO:0007165~signal transduction	117	6774, 943, 2099, 3480, 4615, 6416, 9047, 1387, 5159, 8874, 1385, 207, 1793, 3717, 409, 408, 7410, 10000, 472, 6778, 4790, 4793, 1457, 1436, 8439, 114609, 1432, 8945, 1785, 7188, 7187, 7186, 10010, 3320, 7185, 7046, 4233, 94, 392, 8660, 5335, 613, 2185, 148022, 5894, 5579, 6464, 8767, 84433, 5062, 2475, 8772, 51135, 10657, 5580, 3635, 2066, 5602, 128178, 2064, 5880, 2065, 6452, 5600, 5606, 2908, 5…	27.5943	424	16792	1161	3.99108	6.91197e-40	2.37772e-36	4.75544e-37	1.26359e-36	3717, 472, 1436, 5579, 3635, 5880, 834, 7305, 6195, 5594, 3560, 27040, 3702, 55824, 355, 5293, 10788, 4067, 2533	19	8660, 2066, 2065, 2908, 4982, 1956, 868, 367, 10040, 5468, 3667	11
GOTERM_BP_DIRECT	GO:0043123~positive regulation of I-kappaB kinase/NF-kappaB signaling	49	843, 841, 1147, 148022, 5579, 10892, 8767, 330, 84433, 4615, 10616, 8772, 10758, 387, 8737, 51135, 8600, 57162, 4215, 3551, 64127, 6885, 25, 834, 7132, 3661, 8517, 114609, 5970, 81858, 1499, 7189, 7188, 7334, 7335, 23118, 8717, 4055, 5966, 958, 57506, 329, 55072, 6233, 29110, 2280, 356, 8915, 2534	11.5566	424	16792	161	12.0533	2.55278e-38	8.78157e-35	1.4636e-35	4.66678e-35	841, 5579, 330, 8600, 64127, 834, 5966	7	10758, 57162	2
GOTERM_BP_DIRECT	GO:0002223~stimulatory C-type lectin receptor signaling pathway	40	8517, 3265, 5063, 1147, 5971, 257397, 5894, 10892, 2033, 5970, 8945, 84433, 5062, 6500, 7189, 23291, 6850, 7334, 1387, 7335, 2207, 23118, 5580, 6714, 9252, 5566, 5170, 5058, 3551, 6885, 6233, 4893, 8454, 5336, 8915, 10454, 2534, 4790, 4792, 4067	9.43396	424	16792	105	15.0872	1.60343e-35	5.5158e-32	6.89475e-33	2.93125e-32	6850, 2207, 5336, 4067	4	4792	1
GOTERM_BP_DIRECT	GO:0048010~vascular endothelial growth factor receptor signaling pathway	34	7867, 1432, 9261, 5062, 3315, 9047, 3320, 387, 5747, 6714, 5600, 4689, 4688, 5603, 7409, 9564, 3690, 1793, 1398, 5290, 5291, 3685, 7410, 10458, 653361, 2534, 10787, 2185, 1535, 5879, 5295, 5296, 998, 4690	8.01887	424	16792	72	18.7018	6.8775e-34	2.36586e-30	2.15078e-31	1.25729e-30	4689, 4688, 653361, 1535	4		0
GOTERM_BP_DIRECT	GO:0007249~I-kappaB kinase/NF-kappaB signaling	30	8517, 5971, 257397, 1147, 148022, 8767, 330, 81858, 7189, 10616, 7186, 10010, 8737, 23118, 8717, 602, 5966, 329, 55072, 3551, 6885, 6233, 7132, 29110, 7098, 7099, 8915, 10454, 4791, 4790	7.07547	424	16792	60	19.8019	9.07784e-31	3.12278e-27	2.40213e-28	1.65953e-27	330, 5966	2		0
GOTERM_BP_DIRECT	GO:0048015~phosphatidylinositol-mediated signaling	35	10818, 1436, 5781, 1956, 940, 9846, 2475, 3480, 387, 253260, 5159, 2066, 5728, 2064, 2065, 5156, 7409, 3815, 5170, 8660, 79109, 207, 2260, 5290, 5291, 6198, 5293, 2549, 2885, 3667, 2534, 3932, 4914, 5295, 5296	8.25472	424	16792	106	13.0767	1.35189e-28	4.6505e-25	2.90656e-26	2.47141e-25	1436, 940, 5293, 2885, 3932	5	5781, 1956, 2066, 2065, 8660, 2260, 3667	7
GOTERM_BP_DIRECT	GO:0035556~intracellular signal transduction	58	7535, 5579, 5894, 6464, 7297, 8569, 10758, 8878, 5584, 5580, 3635, 5600, 9252, 5588, 5603, 4215, 8874, 4216, 3815, 5170, 64127, 3716, 207, 11184, 3717, 6196, 6197, 7305, 10000, 5590, 8986, 5879, 4087, 6195, 1432, 2932, 5663, 27040, 3702, 3315, 1843, 2872, 6850, 369, 7049, 7046, 6714, 29760, 51701, 55824, 3937, 1399, 5335, 5336, 2534, 613, 2533, 8844	13.6792	424	16792	403	5.6998	8.41845e-27	2.89595e-23	1.60886e-24	1.53899e-23	7535, 5579, 3635, 64127, 3717, 7305, 6195, 27040, 3702, 6850, 29760, 55824, 3937, 5336, 2533	15	10758, 2872, 7049	3
GOTERM_BP_DIRECT	GO:0007179~transforming growth factor beta receptor signaling pathway	30	3725, 57154, 867, 5371, 7042, 7040, 387, 7049, 7048, 7046, 4092, 7043, 4091, 9958, 5747, 6714, 51701, 94, 6885, 1385, 6233, 409, 2280, 5590, 10454, 4088, 2022, 2353, 4086, 4087	7.07547	424	16792	92	12.9143	2.62349e-24	9.02481e-21	3.76034e-22	4.79604e-21		0	3725, 7042, 7049, 7048, 4088	5
GOTERM_BP_DIRECT	GO:0007173~epidermal growth factor receptor signaling pathway	24	1445, 5747, 3265, 6714, 5781, 9252, 1956, 6464, 5170, 868, 9564, 867, 25, 55824, 5290, 7040, 4893, 2549, 5335, 2885, 8826, 2185, 5295, 6654	5.66038	424	16792	56	16.973	1.33315e-22	4.58605e-19	1.63787e-20	2.43716e-19	1445, 55824, 2885	3	5781, 1956, 868	3
GOTERM_BP_DIRECT	GO:0007169~transmembrane receptor protein tyrosine kinase signaling pathway	29	7535, 1436, 1435, 1956, 9846, 7297, 3702, 3480, 6850, 4233, 2066, 1445, 2064, 2065, 29760, 3815, 916, 3716, 55824, 5291, 2889, 3937, 5979, 2534, 10188, 3643, 3932, 4067, 4914	6.83962	424	16792	96	11.9636	1.81897e-22	6.25727e-19	2.15768e-20	3.32529e-19	7535, 1436, 3702, 6850, 1445, 29760, 916, 55824, 3937, 3932, 4067	11	1956, 2066, 2065	3
GOTERM_BP_DIRECT	GO:0070423~nucleotide-binding oligomerization domain containing signaling pathway	18	841, 8517, 257397, 1147, 8767, 3551, 64127, 6885, 5608, 6233, 7189, 7334, 7335, 7128, 23118, 1540, 10454, 83737	4.24528	424	16792	25	28.5147	4.28545e-22	1.47419e-18	4.91398e-20	7.83428e-19	841, 64127, 7128, 1540	4		0
GOTERM_BP_DIRECT	GO:0010803~regulation of tumor necrosis factor-mediated signaling pathway	19	841, 8517, 1147, 329, 55072, 8887, 330, 3551, 81858, 6233, 7132, 10616, 7186, 6850, 8737, 7128, 1540, 7185, 8717	4.48113	424	16792	30	25.0824	7.52506e-22	2.58862e-18	7.8443e-20	1.37567e-18	841, 330, 6850, 7128, 1540	5		0
GOTERM_BP_DIRECT	GO:0014066~regulation of phosphatidylinositol 3-kinase signaling	26	10818, 5781, 1956, 940, 5159, 2066, 2064, 2065, 5156, 7409, 3815, 8660, 207, 2260, 5290, 5291, 5293, 2549, 2885, 3667, 5595, 2534, 3932, 5295, 5296, 5594	6.13208	424	16792	78	13.2013	2.53039e-21	8.70452e-18	2.56015e-19	4.62583e-18	940, 5293, 2885, 3932, 5594	5	5781, 1956, 2066, 2065, 8660, 2260, 3667	7
GOTERM_BP_DIRECT	GO:0038096~Fc-gamma receptor signaling pathway involved in phagocytosis	30	6850, 3320, 919, 5580, 5747, 6714, 8976, 7409, 5058, 25, 1793, 5290, 1398, 5291, 7410, 10458, 5335, 5336, 2885, 5595, 10787, 2534, 2212, 5879, 5295, 4067, 5296, 998, 4690, 5594	7.07547	424	16792	127	9.35522	5.78952e-20	1.9916e-16	5.24104e-18	1.05839e-16	6850, 5336, 2885, 2212, 4067, 5594	6	8976	1
GOTERM_BP_DIRECT	GO:0038128~ERBB2 signaling pathway	19	2066, 3265, 2064, 6714, 2065, 1956, 6464, 11140, 10273, 207, 6233, 5290, 5801, 4893, 2549, 3320, 2885, 5295, 6654	4.48113	424	16792	38	19.8019	2.40208e-19	8.26315e-16	2.0154e-17	4.39127e-16	2885	1	2066, 2065, 1956	3
GOTERM_BP_DIRECT	GO:0035666~TRIF-dependent toll-like receptor signaling pathway	17	3661, 841, 8517, 1147, 148022, 329, 330, 3551, 6233, 29110, 7187, 8772, 7098, 10010, 7099, 8737, 3665	4.00943	424	16792	28	24.0451	4.50112e-19	1.54839e-15	3.68664e-17	8.22857e-16	841, 330	2		0
GOTERM_BP_DIRECT	GO:0033209~tumor necrosis factor-mediated signaling pathway	28	6772, 3604, 943, 330, 8764, 7187, 7186, 8792, 8737, 4804, 8717, 4055, 8600, 958, 128178, 2309, 329, 3551, 7133, 4982, 6233, 3717, 7132, 939, 51330, 355, 356, 2185	6.60377	424	16792	118	9.39751	1.07099e-18	3.68422e-15	8.00916e-17	1.9579e-15	6772, 330, 8600, 3717, 939, 355	6	2309, 4982	2
GOTERM_BP_DIRECT	GO:0097191~extrinsic apoptotic signaling pathway	18	841, 5170, 5371, 7133, 3717, 939, 51330, 7042, 3458, 7040, 355, 8772, 7098, 356, 8737, 4088, 572, 8717	4.24528	424	16792	42	16.973	6.65031e-17	3.81917e-13	7.66054e-15	1.9984e-13	841, 3717, 939, 355	4	7042, 4088	2
GOTERM_BP_DIRECT	GO:0046627~negative regulation of insulin receptor signaling pathway	15	5579, 5588, 5970, 7249, 2931, 8651, 6198, 5590, 7248, 3667, 5770, 3553, 9021, 5771, 5580	3.53774	424	16792	29	20.4847	1.79489e-15	6.11067e-12	1.13132e-13	3.24185e-12	5579, 5771	2	3667	1
GOTERM_BP_DIRECT	GO:0097190~apoptotic signaling pathway	20	4217, 843, 958, 841, 148022, 940, 916, 943, 7133, 8764, 4982, 921, 355, 8772, 7098, 8792, 356, 7099, 8737, 4804	4.71698	424	16792	71	11.156	7.30255e-15	2.52065e-11	4.583e-13	1.34004e-11	841, 940, 916, 355	4	4982	1
GOTERM_BP_DIRECT	GO:0060334~regulation of interferon-gamma-mediated signaling pathway	11	8554, 3458, 3459, 6772, 7341, 11140, 9021, 8651, 3716, 5771, 3717	2.59434	424	16792	13	33.5109	2.48196e-14	8.55493e-11	1.47504e-12	4.54636e-11	6772, 5771, 3717	3		0
GOTERM_BP_DIRECT	GO:0008286~insulin receptor signaling pathway	20	8503, 2308, 6464, 9564, 2931, 8660, 207, 3480, 5590, 2549, 10458, 2885, 3667, 5770, 3643, 5786, 5295, 5296, 6654, 5771	4.71698	424	16792	78	10.1548	4.83067e-14	1.66134e-10	2.81586e-12	8.82849e-11	2885, 5771	2	2308, 8660, 3667	3
GOTERM_BP_DIRECT	GO:0007265~Ras protein signal transduction	19	3725, 7867, 3265, 5600, 1432, 6464, 9261, 5925, 1026, 27040, 7157, 9402, 6237, 1399, 4893, 2885, 22808, 6654, 8844	4.48113	424	16792	70	10.7496	8.12202e-14	2.79563e-10	4.65938e-12	1.4857e-10	27040, 2885	2	3725	1
GOTERM_BP_DIRECT	GO:0031663~lipopolysaccharide-mediated signaling pathway	14	3661, 4846, 148022, 1432, 8767, 207, 4615, 7040, 7099, 5595, 3553, 4067, 4792, 5594	3.30189	424	16792	32	17.3267	3.08136e-13	1.05982e-09	1.65596e-11	5.63216e-10	4067, 5594	2	4792	1
GOTERM_BP_DIRECT	GO:0048013~ephrin receptor signaling pathway	19	5747, 6714, 3265, 5063, 2904, 8976, 5781, 8874, 5058, 1759, 1398, 7410, 387, 2534, 4067, 4914, 5879, 998, 4690	4.48113	424	16792	86	8.74967	3.69294e-12	1.27037e-08	1.7644e-10	6.75111e-09	4067	1	8976, 5781	2
GOTERM_BP_DIRECT	GO:0030512~negative regulation of transforming growth factor beta receptor signaling pathway	16	57154, 10273, 5170, 1785, 11171, 6233, 7040, 4088, 7049, 7048, 2022, 7046, 4092, 4091, 7043, 4087	3.77358	424	16792	64	9.90094	4.21426e-11	1.4497e-07	1.83507e-09	7.70413e-08		0	4088, 7049, 7048	3
GOTERM_BP_DIRECT	GO:0008625~extrinsic apoptotic signaling pathway via death domain receptors	13	843, 153090, 355, 56616, 8772, 356, 3604, 572, 11337, 5295, 8717, 7132, 939	3.06604	424	16792	38	13.5487	8.37136e-11	2.87975e-07	3.51189e-09	1.53038e-07	355, 939	2		0
GOTERM_BP_DIRECT	GO:0019221~cytokine-mediated signaling pathway	21	1436, 6774, 3572, 5970, 3560, 3815, 8651, 3440, 7132, 3717, 1050, 4615, 2280, 1634, 572, 3553, 9021, 7850, 51135, 3587, 8600	4.95283	424	16792	131	6.3487	1.02615e-10	3.52994e-07	4.20231e-09	1.87591e-07	1436, 3560, 3717, 3587, 8600	5	1634	1
GOTERM_BP_DIRECT	GO:0097296~activation of cysteine-type endopeptidase activity involved in apoptotic signaling pathway	9	841, 355, 7186, 8772, 356, 8737, 4088, 8717, 3717	2.12264	424	16792	13	27.418	1.75005e-10	6.02018e-07	6.91975e-09	3.1993e-07	841, 355, 3717	3	4088	1
GOTERM_BP_DIRECT	GO:1902042~negative regulation of extrinsic apoptotic signaling pathway via death domain receptors	12	841, 355, 7186, 8772, 4846, 5894, 356, 672, 8737, 7128, 8717, 8682	2.83019	424	16792	33	14.4014	2.67688e-10	9.20847e-07	1.00092e-08	4.89364e-07	841, 355, 7128	3		0
GOTERM_BP_DIRECT	GO:0007166~cell surface receptor signaling pathway	29	843, 7867, 841, 3265, 114609, 1432, 1956, 940, 868, 867, 330, 8764, 3440, 4615, 2872, 3458, 8772, 919, 3455, 3554, 4233, 10657, 2064, 329, 916, 10379, 939, 10188, 2185	6.83962	424	16792	274	4.19164	3.41718e-10	1.17551e-06	1.26399e-08	6.24699e-07	841, 940, 330, 3455, 916, 939	6	1956, 868, 2872	3
GOTERM_BP_DIRECT	GO:0048008~platelet-derived growth factor receptor signaling pathway	11	2889, 6714, 5728, 2549, 5781, 5156, 8826, 613, 9564, 5159, 3717	2.59434	424	16792	29	15.0221	1.20839e-09	4.15685e-06	4.03578e-08	2.20907e-06	3717	1	5781	1
GOTERM_BP_DIRECT	GO:0002755~MyD88-dependent toll-like receptor signaling pathway	11	7189, 4615, 114609, 257397, 7099, 4214, 23118, 10454, 6885, 51135, 6233	2.59434	424	16792	33	13.2013	5.10227e-09	1.75517e-05	1.61026e-07	9.32753e-06		0		0
GOTERM_BP_DIRECT	GO:0071550~death-inducing signaling complex assembly	7	841, 7186, 8772, 5894, 8737, 8717, 7132	1.65094	424	16792	8	34.6533	6.61934e-09	2.27703e-05	2.03308e-07	1.21009e-05	841	1		0
GOTERM_BP_DIRECT	GO:0060338~regulation of type I interferon-mediated signaling pathway	10	5781, 6772, 3454, 11140, 6773, 3455, 5770, 7297, 3716, 3440	2.35849	424	16792	26	15.2322	8.01922e-09	2.75858e-05	2.44125e-07	1.46601e-05	6772, 6773, 3455	3	5781	1
GOTERM_BP_DIRECT	GO:2001238~positive regulation of extrinsic apoptotic signaling pathway	10	51330, 10616, 7186, 8772, 8737, 8915, 1540, 5371, 5062, 4055	2.35849	424	16792	26	15.2322	8.01922e-09	2.75858e-05	2.44125e-07	1.46601e-05	1540	1		0
GOTERM_BP_DIRECT	GO:0002224~toll-like receptor signaling pathway	10	7189, 7867, 6197, 4615, 7187, 7098, 7099, 8915, 9261, 51135	2.35849	424	16792	27	14.6681	1.17626e-08	4.04626e-05	3.51855e-07	2.15034e-05		0		0
GOTERM_BP_DIRECT	GO:0007229~integrin-mediated signaling pathway	16	1601, 5747, 6714, 5781, 7409, 9564, 3690, 3611, 27040, 1793, 3685, 3674, 7305, 6850, 2207, 2185	3.77358	424	16792	99	6.40061	2.5439e-08	8.75064e-05	7.23225e-07	4.65054e-05	27040, 7305, 6850, 2207	4	5781	1
GOTERM_BP_DIRECT	GO:0009967~positive regulation of signal transduction	13	1398, 55824, 9047, 6452, 29760, 392, 2885, 8631, 9479, 27040, 10657, 4068, 9402	3.06604	424	16792	61	8.44015	3.18888e-08	0.000109692	8.9916e-07	5.82964e-05	55824, 29760, 2885, 27040, 4068	5		0
GOTERM_BP_DIRECT	GO:0014068~positive regulation of phosphatidylinositol 3-kinase signaling	13	7042, 2066, 5747, 2065, 5156, 940, 2534, 1634, 3815, 867, 5159, 2260, 3717	3.06604	424	16792	65	7.92075	6.73143e-08	0.000231534	1.74106e-06	0.000123058	940, 3717	2	7042, 2066, 2065, 1634, 2260	5
GOTERM_BP_DIRECT	GO:0050853~B cell receptor signaling pathway	12	7535, 5293, 6850, 5579, 5336, 9564, 4773, 25, 3932, 4067, 5594, 1493	2.83019	424	16792	54	8.80084	8.22343e-08	0.000282846	2.11109e-06	0.000150334	7535, 5293, 6850, 5579, 5336, 3932, 4067, 5594	8		0
GOTERM_BP_DIRECT	GO:0043491~protein kinase B signaling	10	5290, 958, 7040, 5728, 6198, 117145, 7249, 3553, 3611, 207	2.35849	424	16792	33	12.0011	8.46374e-08	0.00029111	2.14083e-06	0.000154727		0		0
GOTERM_BP_DIRECT	GO:0097192~extrinsic apoptotic signaling pathway in absence of ligand	10	3685, 2872, 355, 8772, 2065, 2309, 2932, 572, 3553, 2931	2.35849	424	16792	34	11.6482	1.12563e-07	0.000387141	2.76582e-06	0.000205777	355	1	2872, 2065, 2309	3
GOTERM_BP_DIRECT	GO:0051897~positive regulation of protein kinase B signaling	14	409, 5747, 7040, 6714, 10253, 1956, 940, 253260, 3643, 3611, 7046, 4486, 2475, 8600	3.30189	424	16792	84	6.60063	1.68956e-07	0.000581039	4.03616e-06	0.00030887	940, 8600	2	10253, 1956	2
GOTERM_BP_DIRECT	GO:0042059~negative regulation of epidermal growth factor receptor signaling pathway	10	153090, 10253, 2885, 1956, 8874, 867, 30011, 5771, 998, 6233	2.35849	424	16792	36	11.001	1.93206e-07	0.000664408	4.58363e-06	0.000353202	2885, 5771	2	10253, 1956	2
GOTERM_BP_DIRECT	GO:0043124~negative regulation of I-kappaB kinase/NF-kappaB signaling	10	153090, 841, 5495, 2950, 10010, 6772, 8737, 7128, 25, 2099	2.35849	424	16792	40	9.90094	5.13216e-07	0.00176391	1.17697e-05	0.000938213	841, 6772, 7128	3		0
GOTERM_BP_DIRECT	GO:0038061~NIK/NF-kappaB signaling	12	23291, 5971, 8454, 1147, 329, 8945, 330, 4791, 4790, 6233, 5966, 6500	2.83019	424	16792	66	7.20069	7.03302e-07	0.00241643	1.571e-05	0.00128571	330, 5966	2		0
GOTERM_BP_DIRECT	GO:0060397~JAK-STAT cascade involved in growth hormone signaling pathway	7	6774, 5595, 5770, 6776, 4067, 5594, 3717	1.65094	424	16792	15	18.4818	1.01804e-06	0.00349592	2.23058e-05	0.00186107	4067, 5594, 3717	3		0
GOTERM_BP_DIRECT	GO:0048011~neurotrophin TRK receptor signaling pathway	7	6714, 5781, 5894, 9564, 4804, 4914, 6654	1.65094	424	16792	16	17.3267	1.5943e-06	0.00546939	3.4064e-05	0.00291453		0	5781	1
GOTERM_BP_DIRECT	GO:1902041~regulation of extrinsic apoptotic signaling pathway via death domain receptors	7	841, 355, 7186, 8772, 356, 8737, 8717	1.65094	424	16792	17	16.3074	2.41167e-06	0.00826184	5.02785e-05	0.00440872	841, 355	2		0
GOTERM_BP_DIRECT	GO:0014065~phosphatidylinositol 3-kinase signaling	8	3480, 5291, 2064, 5293, 2065, 3667, 5295, 5296	1.88679	424	16792	27	11.7345	3.51635e-06	0.0120234	7.24302e-05	0.0064281	5293	1	2065, 3667	2
GOTERM_BP_DIRECT	GO:2001237~negative regulation of extrinsic apoptotic signaling pathway	9	3685, 6714, 6198, 2950, 246330, 8737, 367, 5970, 7046	2.12264	424	16792	38	9.37984	3.82392e-06	0.0130682	7.78331e-05	0.00699033		0	367	1
GOTERM_BP_DIRECT	GO:0060337~type I interferon signaling pathway	11	3661, 6772, 3454, 6773, 3455, 7297, 10379, 3716, 3394, 3440, 3665	2.59434	424	16792	64	6.8069	4.15719e-06	0.014199	8.31406e-05	0.00759955	6772, 6773, 3455, 3394	4		0
GOTERM_BP_DIRECT	GO:0097527~necroptotic signaling pathway	5	355, 8772, 7098, 356, 8737	1.17925	424	16792	6	33.0031	5.7215e-06	0.0194896	0.000111823	0.010459	355	1		0
GOTERM_BP_DIRECT	GO:0030521~androgen receptor signaling pathway	9	8554, 8648, 10891, 672, 367, 5925, 8202, 1499, 5469	2.12264	424	16792	41	8.69351	6.99292e-06	0.0237687	0.00013438	0.0127831		0	367	1
GOTERM_BP_DIRECT	GO:0051056~regulation of small GTPase mediated signal transduction	15	5880, 6655, 392, 8874, 7409, 7249, 7410, 387, 396, 613, 7204, 5879, 998, 6654, 5296	3.53774	424	16792	134	4.43326	7.30984e-06	0.0248324	0.000138155	0.0133624	5880	1		0
GOTERM_BP_DIRECT	GO:0060333~interferon-gamma-mediated signaling pathway	11	3661, 3458, 3459, 6772, 5371, 10379, 3716, 3394, 5580, 3665, 3717	2.59434	424	16792	71	6.1358	1.08316e-05	0.0365753	0.000195064	0.0197995	6772, 3394, 3717	3		0
GOTERM_BP_DIRECT	GO:0070059~intrinsic apoptotic signaling pathway in response to endoplasmic reticulum stress	8	4217, 153090, 1051, 7186, 2081, 468, 2932, 5371	1.88679	424	16792	33	9.60091	1.4845e-05	0.0497851	0.00025919	0.0271348		0		0
GOTERM_BP_DIRECT	GO:1901796~regulation of signal transduction by p53 class mediator	14	1457, 5600, 1432, 2033, 672, 4193, 5371, 207, 7157, 6233, 6908, 472, 3065, 3066	3.30189	424	16792	124	4.47139	1.48917e-05	0.0499377	0.000258693	0.0272202	472	1		0
GOTERM_BP_DIRECT	GO:0070498~interleukin-1-mediated signaling pathway	6	7189, 9252, 5595, 8986, 3551, 3554	1.41509	424	16792	14	16.973	1.64375e-05	0.0549765	0.000284108	0.0300454		0		0
GOTERM_BP_DIRECT	GO:0043122~regulation of I-kappaB kinase/NF-kappaB signaling	6	153090, 8878, 8945, 5170, 3553, 3315	1.41509	424	16792	15	15.8415	2.41473e-05	0.079711	0.000399284	0.0441347		0		0
GOTERM_BP_DIRECT	GO:0007172~signal complex assembly	5	6714, 5747, 916, 2185, 4690	1.17925	424	16792	8	24.7524	2.56468e-05	0.0844463	0.000422046	0.0468749	916	1		0
GOTERM_BP_DIRECT	GO:0097193~intrinsic apoptotic signaling pathway	7	56616, 3265, 8454, 8453, 572, 1026, 7157	1.65094	424	16792	30	9.24088	8.76428e-05	0.260295	0.00132733	0.1601		0		0
GOTERM_BP_DIRECT	GO:0070431~nucleotide-binding oligomerization domain containing 2 signaling pathway	4	5970, 8767, 64127, 4792	0.943396	424	16792	5	31.683	0.000152849	0.408943	0.00220698	0.279057	64127	1	4792	1
GOTERM_BP_DIRECT	GO:0007219~Notch signaling pathway	12	1050, 7040, 1387, 2033, 4851, 5663, 7048, 1027, 83737, 6233, 4609, 351	2.83019	424	16792	115	4.13257	0.000154493	0.412276	0.00221213	0.282055		0	7048, 4609, 351	3
GOTERM_BP_DIRECT	GO:0006977~DNA damage response, signal transduction by p53 class mediator resulting in cell cycle arrest	9	10498, 2033, 472, 4193, 5371, 1027, 1026, 6233, 7157	2.12264	424	16792	62	5.74893	0.000155966	0.415246	0.00222393	0.284739	472	1		0
GOTERM_BP_DIRECT	GO:0008630~intrinsic apoptotic signaling pathway in response to DNA damage	8	672, 472, 572, 5371, 25, 7133, 5295, 7132	1.88679	424	16792	47	6.74107	0.000161304	0.425888	0.00229048	0.294472	472	1		0
GOTERM_BP_DIRECT	GO:0007264~small GTPase mediated signal transduction	18	5880, 6655, 3265, 392, 23647, 7409, 1793, 1794, 6237, 2889, 7410, 4893, 387, 22808, 10188, 5879, 998, 6654	4.24528	424	16792	246	2.89784	0.000176062	0.454311	0.00247932	0.321372	5880, 1794	2		0
GOTERM_BP_DIRECT	GO:0002756~MyD88-independent toll-like receptor signaling pathway	5	7189, 7098, 148022, 7099, 6233	1.17925	424	16792	13	15.2322	0.000236952	0.557455	0.00326859	0.43229		0		0
GOTERM_BP_DIRECT	GO:0008063~Toll signaling pathway	4	57162, 4615, 7187, 246330	0.943396	424	16792	6	26.4025	0.000299977	0.643734	0.00407105	0.546974		0	57162	1
GOTERM_BP_DIRECT	GO:0048009~insulin-like growth factor receptor signaling pathway	5	3480, 7249, 3667, 5295, 207	1.17925	424	16792	14	14.1442	0.000325158	0.673304	0.00437755	0.592759		0	3667	1
GOTERM_BP_DIRECT	GO:2001235~positive regulation of apoptotic signaling pathway	6	153090, 5601, 5728, 7046, 6188, 5580	1.41509	424	16792	25	9.50491	0.000347019	0.696979	0.00459924	0.632491		0		0
GOTERM_BP_DIRECT	GO:0046580~negative regulation of Ras protein signal transduction	6	10617, 7042, 153090, 2889, 10253, 79109	1.41509	424	16792	25	9.50491	0.000347019	0.696979	0.00459924	0.632491		0	7042, 10253	2
GOTERM_BP_DIRECT	GO:0008631~intrinsic apoptotic signaling pathway in response to oxidative stress	5	4217, 56616, 5371, 5580, 3717	1.17925	424	16792	15	13.2013	0.000434617	0.775843	0.0056914	0.791552	3717	1		0
GOTERM_BP_DIRECT	GO:0030509~BMP signaling pathway	9	9958, 57154, 94, 5595, 7049, 2022, 4092, 4086, 4091	2.12264	424	16792	76	4.68992	0.00064042	0.889611	0.00809894	1.1643		0	7049	1
GOTERM_BP_DIRECT	GO:0023014~signal transduction by protein phosphorylation	7	7042, 94, 7048, 3643, 5062, 7046, 4067	1.65094	424	16792	44	6.3006	0.000773959	0.930293	0.00956927	1.40546	4067	1	7042, 7048	2
GOTERM_BP_DIRECT	GO:0060396~growth hormone receptor signaling pathway	4	5747, 6774, 5295, 3717	0.943396	424	16792	8	19.8019	0.000808848	0.938182	0.00992732	1.46838	3717	1		0
GOTERM_BP_DIRECT	GO:0060395~SMAD protein signal transduction	8	7042, 3725, 7040, 4088, 2353, 4086, 7043, 4087	1.88679	424	16792	62	5.11016	0.000912603	0.956751	0.0110368	1.65525		0	7042, 3725, 4088	3
GOTERM_BP_DIRECT	GO:0016055~Wnt signaling pathway	14	1457, 1601, 2932, 8945, 51588, 331, 2931, 6233, 1499, 6500, 23291, 8454, 5336, 1540	3.30189	424	16792	187	2.96499	0.000934196	0.95985	0.0112178	1.6941	5336, 1540	2		0
GOTERM_BP_DIRECT	GO:0035023~regulation of Rho protein signal transduction	9	6655, 7410, 5894, 8874, 396, 7409, 613, 7204, 6654	2.12264	424	16792	81	4.40042	0.000979602	0.965661	0.0116786	1.77575		0		0
GOTERM_BP_DIRECT	GO:0008543~fibroblast growth factor receptor signaling pathway	9	10818, 5781, 2885, 8826, 5595, 867, 6233, 5594, 2260	2.12264	424	16792	82	4.34676	0.00106212	0.974155	0.0124412	1.92396	2885, 5594	2	5781, 2260	2
GOTERM_BP_DIRECT	GO:0060340~positive regulation of type I interferon-mediated signaling pathway	4	3661, 57506, 8772, 3665	0.943396	424	16792	9	17.6017	0.00119065	0.983399	0.0137041	2.15439		0		0
GOTERM_BP_DIRECT	GO:0017015~regulation of transforming growth factor beta receptor signaling pathway	5	7040, 4088, 2022, 4092, 4087	1.17925	424	16792	20	9.90094	0.00139619	0.991822	0.0157888	2.52184		0	4088	1
GOTERM_BP_DIRECT	GO:0033148~positive regulation of intracellular estrogen receptor signaling pathway	4	367, 5058, 6502, 5469	0.943396	424	16792	10	15.8415	0.00166925	0.996808	0.0186663	3.00796		0	367	1
GOTERM_BP_DIRECT	GO:0014067~negative regulation of phosphatidylinositol 3-kinase signaling	4	10617, 153090, 5728, 7249	0.943396	424	16792	10	15.8415	0.00166925	0.996808	0.0186663	3.00796		0		0
GOTERM_BP_DIRECT	GO:0038145~macrophage colony-stimulating factor signaling pathway	3	1436, 1435, 4486	0.707547	424	16792	3	39.6038	0.00186756	0.998388	0.0205953	3.35957	1436	1		0
GOTERM_BP_DIRECT	GO:0070424~regulation of nucleotide-binding oligomerization domain containing signaling pathway	3	329, 330, 331	0.707547	424	16792	3	39.6038	0.00186756	0.998388	0.0205953	3.35957	330	1		0
GOTERM_BP_DIRECT	GO:0045742~positive regulation of epidermal growth factor receptor signaling pathway	5	356, 867, 207, 6233, 6654	1.17925	424	16792	24	8.25079	0.00282814	0.999941	0.0298947	5.04573		0		0
GOTERM_BP_DIRECT	GO:0090090~negative regulation of canonical Wnt signaling pathway	12	1601, 153090, 2889, 1432, 2308, 2309, 4851, 1540, 2932, 3065, 2931, 6233	2.83019	424	16792	163	2.91562	0.00284615	0.999945	0.0299905	5.07708	1540	1	2308, 2309	2
GOTERM_BP_DIRECT	GO:0032925~regulation of activin receptor signaling pathway	3	2280, 4221, 4092	0.707547	424	16792	4	29.7028	0.00367281	0.999997	0.0376304	6.50542		0		0
GOTERM_BP_DIRECT	GO:0034121~regulation of toll-like receptor signaling pathway	3	329, 330, 2099	0.707547	424	16792	4	29.7028	0.00367281	0.999997	0.0376304	6.50542	330	1		0
GOTERM_BP_DIRECT	GO:0030330~DNA damage response, signal transduction by p53 class mediator	4	10538, 2309, 7157, 602	0.943396	424	16792	15	10.561	0.00576355	1	0.055848	10.0278		0	2309	1
GOTERM_BP_DIRECT	GO:0035791~platelet-derived growth factor receptor-beta signaling pathway	3	5770, 25, 5159	0.707547	424	16792	5	23.7623	0.00601945	1	0.0579363	10.4502		0		0
GOTERM_BP_DIRECT	GO:0038027~apolipoprotein A-I-mediated signaling pathway	3	3685, 387, 3690	0.707547	424	16792	5	23.7623	0.00601945	1	0.0579363	10.4502		0		0
GOTERM_BP_DIRECT	GO:0032924~activin receptor signaling pathway	4	94, 4088, 7046, 4087	0.943396	424	16792	16	9.90094	0.00696252	1	0.0658212	11.9907		0	4088	1
GOTERM_BP_DIRECT	GO:0006978~DNA damage response, signal transduction by p53 class mediator resulting in transcription of p21 class mediator	4	51147, 672, 1026, 7157	0.943396	424	16792	16	9.90094	0.00696252	1	0.0658212	11.9907		0		0
GOTERM_BP_DIRECT	GO:0010804~negative regulation of tumor necrosis factor-mediated signaling pathway	4	2950, 246330, 51588, 5771	0.943396	424	16792	16	9.90094	0.00696252	1	0.0658212	11.9907	5771	1		0
GOTERM_BP_DIRECT	GO:0042771~intrinsic apoptotic signaling pathway in response to DNA damage by p53 class mediator	5	2033, 5371, 1026, 7157, 602	1.17925	424	16792	31	6.38771	0.00729198	1	0.0686495	12.523		0		0
GOTERM_BP_DIRECT	GO:0030513~positive regulation of BMP signaling pathway	5	94, 4851, 2022, 3611, 4087	1.17925	424	16792	31	6.38771	0.00729198	1	0.0686495	12.523		0		0
GOTERM_BP_DIRECT	GO:0034142~toll-like receptor 4 signaling pathway	4	114609, 7099, 8767, 4792	0.943396	424	16792	18	8.80084	0.00977463	1	0.0893544	16.4371		0	4792	1
GOTERM_BP_DIRECT	GO:0035357~peroxisome proliferator activated receptor signaling pathway	3	6256, 5468, 5469	0.707547	424	16792	7	16.973	0.0122248	1	0.108895	20.1372		0	5468	1
GOTERM_BP_DIRECT	GO:0051057~positive regulation of small GTPase mediated signal transduction	3	6714, 6655, 6654	0.707547	424	16792	7	16.973	0.0122248	1	0.108895	20.1372		0		0
GOTERM_BP_DIRECT	GO:2001240~negative regulation of extrinsic apoptotic signaling pathway in absence of ligand	5	7015, 8737, 2534, 3553, 207	1.17925	424	16792	37	5.35186	0.0136033	1	0.118964	22.1503		0		0
GOTERM_BP_DIRECT	GO:0030520~intracellular estrogen receptor signaling pathway	4	10498, 6714, 23054, 2099	0.943396	424	16792	21	7.54358	0.0150692	1	0.129699	24.2384		0		0
GOTERM_BP_DIRECT	GO:0034128~negative regulation of MyD88-independent toll-like receptor signaling pathway	3	7098, 148022, 7099	0.707547	424	16792	8	14.8514	0.0160301	1	0.136762	25.5783		0		0
GOTERM_BP_DIRECT	GO:0006987~activation of signaling protein activity involved in unfolded protein response	3	153090, 2081, 5770	0.707547	424	16792	8	14.8514	0.0160301	1	0.136762	25.5783		0		0
GOTERM_BP_DIRECT	GO:0060070~canonical Wnt signaling pathway	7	5728, 4088, 2932, 5663, 998, 4609, 1499	1.65094	424	16792	83	3.34008	0.0182805	1	0.153076	28.6292		0	4088, 4609	2
GOTERM_BP_DIRECT	GO:0007167~enzyme linked receptor protein signaling pathway	3	2064, 6850, 3717	0.707547	424	16792	9	13.2013	0.02027	1	0.16721	31.2274	6850, 3717	2		0
GOTERM_BP_DIRECT	GO:0034144~negative regulation of toll-like receptor 4 signaling pathway	3	153090, 7128, 4067	0.707547	424	16792	9	13.2013	0.02027	1	0.16721	31.2274	7128, 4067	2		0
GOTERM_BP_DIRECT	GO:0048012~hepatocyte growth factor receptor signaling pathway	3	9564, 4233, 4486	0.707547	424	16792	9	13.2013	0.02027	1	0.16721	31.2274		0		0
GOTERM_BP_DIRECT	GO:0070102~interleukin-6-mediated signaling pathway	3	2549, 6774, 3572	0.707547	424	16792	9	13.2013	0.02027	1	0.16721	31.2274		0		0
GOTERM_BP_DIRECT	GO:0035235~ionotropic glutamate receptor signaling pathway	4	2903, 2904, 2185, 351	0.943396	424	16792	24	6.60063	0.0216959	1	0.17632	33.0344		0	351	1
GOTERM_BP_DIRECT	GO:0030514~negative regulation of BMP signaling pathway	5	57154, 4851, 25, 4092, 4091	1.17925	424	16792	45	4.40042	0.0262514	1	0.206331	38.5113		0		0
GOTERM_BP_DIRECT	GO:0042770~signal transduction in response to DNA damage	3	1432, 2885, 25	0.707547	424	16792	11	10.801	0.0299574	1	0.229156	42.6516	2885	1		0
GOTERM_BP_DIRECT	GO:0060766~negative regulation of androgen receptor signaling pathway	3	1601, 6597, 3065	0.707547	424	16792	12	9.90094	0.0353593	1	0.261241	48.2173		0		0
GOTERM_BP_DIRECT	GO:0007266~Rho protein signal transduction	5	1147, 387, 392, 396, 6242	1.17925	424	16792	50	3.96038	0.0368265	1	0.269518	49.6383		0		0
GOTERM_BP_DIRECT	GO:1900740~positive regulation of protein insertion into mitochondrial membrane involved in apoptotic signaling pathway	4	841, 5599, 572, 7157	0.943396	424	16792	30	5.2805	0.0389807	1	0.282501	51.6582	841	1		0
GOTERM_BP_DIRECT	GO:0019722~calcium-mediated signaling	5	5335, 5336, 5170, 27040, 8600	1.17925	424	16792	51	3.88272	0.0391954	1	0.283259	51.8552	5336, 27040, 8600	3		0
GOTERM_BP_DIRECT	GO:0007212~dopamine receptor signaling pathway	3	409, 2932, 2931	0.707547	424	16792	13	9.13933	0.0411045	1	0.29444	53.5743		0		0
GOTERM_BP_DIRECT	GO:0046628~positive regulation of insulin receptor signaling pathway	3	6714, 5590, 3667	0.707547	424	16792	13	9.13933	0.0411045	1	0.29444	53.5743		0	3667	1
GOTERM_BP_DIRECT	GO:0031929~TOR signaling	3	6198, 253260, 2475	0.707547	424	16792	14	8.48652	0.0471723	1	0.327476	58.6611		0		0
GOTERM_BP_DIRECT	GO:2001241~positive regulation of extrinsic apoptotic signaling pathway in absence of ligand	3	7042, 355, 5979	0.707547	424	16792	14	8.48652	0.0471723	1	0.327476	58.6611	355	1	7042	1
GOTERM_BP_DIRECT	GO:1901224~positive regulation of NIK/NF-kappaB signaling	3	64127, 5610, 6188	0.707547	424	16792	14	8.48652	0.0471723	1	0.327476	58.6611	64127	1		0
GOTERM_BP_DIRECT	GO:1902176~negative regulation of oxidative stress-induced intrinsic apoptotic signaling pathway	3	4780, 207, 3315	0.707547	424	16792	14	8.48652	0.0471723	1	0.327476	58.6611		0		0
GOTERM_BP_DIRECT	GO:0045747~positive regulation of Notch signaling pathway	4	6774, 4851, 3815, 64127	0.943396	424	16792	33	4.80046	0.0495941	1	0.340727	60.5403	64127	1		0
GOTERM_BP_DIRECT	GO:1902202~regulation of hepatocyte growth factor receptor signaling pathway	2	5770, 5771	0.471698	424	16792	2	39.6038	0.049748	1	0.340947	60.657	5771	1		0
GOTERM_BP_DIRECT	GO:0070104~negative regulation of interleukin-6-mediated signaling pathway	2	3572, 5771	0.471698	424	16792	2	39.6038	0.049748	1	0.340947	60.657	5771	1		0
GOTERM_BP_DIRECT	GO:0039535~regulation of RIG-I signaling pathway	2	329, 330	0.471698	424	16792	2	39.6038	0.049748	1	0.340947	60.657	330	1		0
GOTERM_BP_DIRECT	GO:0070427~nucleotide-binding oligomerization domain containing 1 signaling pathway	2	8767, 4792	0.471698	424	16792	2	39.6038	0.049748	1	0.340947	60.657		0	4792	1
GOTERM_BP_DIRECT	GO:0002431~Fc receptor mediated stimulatory signaling pathway	2	2207, 4067	0.471698	424	16792	2	39.6038	0.049748	1	0.340947	60.657	2207, 4067	2		0
GOTERM_BP_DIRECT	GO:0071848~positive regulation of ERK1 and ERK2 cascade via TNFSF11-mediated signaling	2	8792, 8600	0.471698	424	16792	2	39.6038	0.049748	1	0.340947	60.657	8600	1		0
GOTERM_BP_DIRECT	GO:0038162~erythropoietin-mediated signaling pathway	2	3815, 2057	0.471698	424	16792	2	39.6038	0.049748	1	0.340947	60.657		0		0
