# Supplementary material for: Effects of rheumatoid arthritis associated transcriptional changes on osteoclast differentiation network in the synovium
Source: PeerJ. 2018 Oct 11;6:e5743. doi: 10.7717/peerj.5743 (PMC6186409; doi:10.7717/peerj.5743)
Supplement: Supplemental Information 4 — The up and downregulated genes are listed in separate pages namely “UPREGULATED_GENES” and the “DOWNREGULATED_GENES” of the table. The table includes the Entrez ID, the name and official gene symbol for each of the DEGs. [file peerj-06-5743-s004.xlsx]

## Sheet: UPREGULATED_GENES
EntrezID	Gene Name
55233	MOB kinase activator 1A(MOB1A)
54103	gamma-secretase activating protein(GSAP)
54102	chloride intracellular channel 6(CLIC6)
942	CD86 molecule(CD86)
940	CD28 molecule(CD28)
25797	glutaminyl-peptide cyclotransferase(QPCT)
23654	plexin B2(PLXNB2)
8743	tumor necrosis factor superfamily member 10(TNFSF10)
330	baculoviral IAP repeat containing 3(BIRC3)
944	tumor necrosis factor superfamily member 8(TNFSF8)
28831	immunoglobulin lambda joining 3(IGLJ3)
50615	interleukin 21 receptor(IL21R)
7357	UDP-glucose ceramide glucosyltransferase(UGCG)
7351	uncoupling protein 2(UCP2)
22900	caspase recruitment domain family member 8(CARD8)
537	ATPase H+ transporting accessory protein 1(ATP6AP1)
1824	desmocollin 2(DSC2)
1827	regulator of calcineurin 1(RCAN1)
146540	zinc finger protein 785(ZNF785)
8407	transgelin 2(TAGLN2)
931	membrane spanning 4-domains A1(MS4A1)
341	apolipoprotein C1(APOC1)
5361	plexin A1(PLXNA1)
23646	phospholipase D family member 3(PLD3)
5360	phospholipid transfer protein(PLTP)
23643	lymphocyte antigen 96(LY96)
10098	tetraspanin 5(TSPAN5)
50619	DEF6, guanine nucleotide exchange factor(DEF6)
939	CD27 molecule(CD27)
3492	immunoglobulin heavy locus(IGH)
929	CD14 molecule(CD14)
3493	immunoglobulin heavy constant alpha 1(IGHA1)
8728	ADAM metallopeptidase domain 19(ADAM19)
10097	ARP2 actin related protein 2 homolog(ACTR2)
10095	actin related protein 2/3 complex subunit 1B(ARPC1B)
3495	immunoglobulin heavy constant delta(IGHD)
1436	colony stimulating factor 1 receptor(CSF1R)
126731	centriole, cilia and spindle associated protein(CCSAP)
920	CD4 molecule(CD4)
6891	transporter 2, ATP binding cassette subfamily B member(TAP2)
6892	TAP binding protein(TAPBP)
925	CD8a molecule(CD8A)
6890	transporter 1, ATP binding cassette subfamily B member(TAP1)
8038	ADAM metallopeptidase domain 12(ADAM12)
8763	CD164 molecule(CD164)
5351	procollagen-lysine,2-oxoglutarate 5-dioxygenase 1(PLOD1)
1439	colony stimulating factor 2 receptor beta common subunit(CSF2RB)
728	complement C5a receptor 1(C5AR1)
115352	Fc receptor like 3(FCRL3)
10085	EGF like repeats and discoidin domains 3(EDIL3)
51296	solute carrier family 15 member 3(SLC15A3)
6472	serine hydroxymethyltransferase 2(SHMT2)
1446	casein alpha s1(CSN1S1)
1445	c-src tyrosine kinase(CSK)
51280	golgi membrane protein 1(GOLM1)
914	CD2 molecule(CD2)
915	CD3d molecule(CD3D)
916	CD3e molecule(CD3E)
100506776	T cell receptor gamma locus antisense RNA 1(TRG-AS1)
5341	pleckstrin(PLEK)
717	complement C2(C2)
115362	guanylate binding protein 5(GBP5)
716	complement C1s(C1S)
713	complement C1q B chain(C1QB)
712	complement C1q A chain(C1QA)
5336	phospholipase C gamma 2(PLCG2)
715	complement C1r(C1R)
80709	AT-hook transcription factor(AKNA)
6480	ST6 beta-galactoside alpha-2,6-sialyltransferase 1(ST6GAL1)
51284	toll like receptor 7(TLR7)
50856	C-type lectin domain family 4 member A(CLEC4A)
387357	thymocyte selection associated(THEMIS)
10068	interleukin 18 binding protein(IL18BP)
57480	pleckstrin homology and RhoGEF domain containing G1(PLEKHG1)
50852	T cell receptor associated transmembrane adaptor 1(TRAT1)
10952	Sec61 translocon beta subunit(SEC61B)
64581	C-type lectin domain family 7 member A(CLEC7A)
8459	tyrosylprotein sulfotransferase 2(TPST2)
983	cyclin dependent kinase 1(CDK1)
27166	PRELI domain containing 1(PRELID1)
9595	cytohesin 1 interacting protein(CYTIP)
701	BUB1 mitotic checkpoint serine/threonine kinase B(BUB1B)
4969	osteoglycin(OGN)
84868	hepatitis A virus cellular receptor 2(HAVCR2)
5329	plasminogen activator, urokinase receptor(PLAUR)
706	translocator protein(TSPO)
5328	plasminogen activator, urokinase(PLAU)
5118	procollagen C-endopeptidase enhancer(PCOLCE)
5320	phospholipase A2 group IIA(PLA2G2A)
972	CD74 molecule(CD74)
9582	apolipoprotein B mRNA editing enzyme catalytic subunit 3B(APOBEC3B)
9315	neuronal regeneration related protein(NREP)
586	branched chain amino acid transaminase 1(BCAT1)
10052	gap junction protein gamma 1(GJC1)
5122	proprotein convertase subtilisin/kexin type 1(PCSK1)
10051	structural maintenance of chromosomes 4(SMC4)
63940	G-protein signaling modulator 3(GPSM3)
8514	potassium voltage-gated channel subfamily A regulatory beta subunit 2(KCNAB2)
969	CD69 molecule(CD69)
10970	cytoskeleton associated protein 4(CKAP4)
1609	diacylglycerol kinase theta(DGKQ)
963	CD53 molecule(CD53)
962	CD48 molecule(CD48)
961	CD47 molecule(CD47)
1809	dihydropyrimidinase like 3(DPYSL3)
83593	Ras association domain family member 5(RASSF5)
1805	dermatopontin(DPT)
387751	GTPase, very large interferon inducible pseudogene 1(GVINP1)
8905	adaptor related protein complex 1 sigma 2 subunit(AP1S2)
84058	WD repeat domain 54(WDR54)
8714	ATP binding cassette subfamily C member 3(ABCC3)
7378	uridine phosphorylase 1(UPP1)
2123	ecotropic viral integration site 2A(EVI2A)
23670	transmembrane protein 2(TMEM2)
2124	ecotropic viral integration site 2B(EVI2B)
951	CD37 molecule(CD37)
79874	rabaptin, RAB GTPase binding effector protein 2(RABEP2)
953	ectonucleoside triphosphate diphosphohydrolase 1(ENTPD1)
952	CD38 molecule(CD38)
55240	STEAP3 metalloreductase(STEAP3)
10788	IQ motif containing GTPase activating protein 2(IQGAP2)
8477	G protein-coupled receptor 65(GPR65)
9332	CD163 molecule(CD163)
29923	hypoxia inducible lipid droplet associated(HILPDA)
84830	androgen dependent TFPI regulating protein(ADTRP)
28823	immunoglobulin lambda variable 1-44(IGLV1-44)
10783	NIMA related kinase 6(NEK6)
29925	GDP-mannose pyrophosphorylase B(GMPPB)
79001	vitamin K epoxide reductase complex subunit 1(VKORC1)
54809	sterile alpha motif domain containing 9(SAMD9)
219699	unc-5 netrin receptor B(UNC5B)
10791	vesicle associated membrane protein 5(VAMP5)
11151	coronin 1A(CORO1A)
9555	H2A histone family member Y(H2AFY)
3003	granzyme K(GZMK)
3683	integrin subunit alpha L(ITGAL)
3684	integrin subunit alpha M(ITGAM)
3676	integrin subunit alpha 4(ITGA4)
54187	N-acetylneuraminate synthase(NANS)
4925	nucleobindin 2(NUCB2)
79887	phospholipase B domain containing 1(PLBD1)
102465871	microRNA 8071-1(MIR8071-1)
100290481	immunoglobulin lambda light chain-like(CYAT1)
55024	B-cell scaffold protein with ankyrin repeats 1(BANK1)
11156	protein tyrosine phosphatase type IVA, member 3(PTP4A3)
9144	synaptogyrin 2(SYNGR2)
29992	paired immunoglobin like type 2 receptor alpha(PILRA)
55027	HEAT repeat containing 3(HEATR3)
4924	nucleobindin 1(NUCB1)
2153	coagulation factor V(F5)
102465879	microRNA 8085(MIR8085)
60386	solute carrier family 25 member 19(SLC25A19)
1894	epithelial cell transforming 2(ECT2)
100861437	nine-amino acid residue-repeats(NARR)
1893	extracellular matrix protein 1(ECM1)
54625	poly(ADP-ribose) polymerase family member 14(PARP14)
100506718	uncharacterized LOC100506718(LOC100506718)
4033	lymphoid restricted membrane protein(LRMP)
8496	PPFIA binding protein 1(PPFIBP1)
8935	src kinase associated phosphoprotein 2(SKAP2)
8934	RAB29, member RAS oncogene family(RAB29)
4938	2'-5'-oligoadenylate synthetase 1(OAS1)
8942	kynureninase(KYNU)
23452	angiopoietin like 2(ANGPTL2)
3689	integrin subunit beta 2(ITGB2)
3002	granzyme B(GZMB)
1618	deleted in azoospermia like(DAZL)
3001	granzyme A(GZMA)
81615	transmembrane protein 163(TMEM163)
55033	FK506 binding protein 14(FKBP14)
81618	integral membrane protein 2C(ITM2C)
112399	egl-9 family hypoxia inducible factor 3(EGLN3)
56990	CDC42 small effector 2(CDC42SE2)
81610	family with sequence similarity 83 member D(FAM83D)
11130	ZW10 interacting kinetochore protein(ZWINT)
9806	SPARC/osteonectin, cwcv and kazal like domains proteoglycan 2(SPOCK2)
2769	G protein subunit alpha 15(GNA15)
9768	KIAA0101(KIAA0101)
6280	S100 calcium binding protein A9(S100A9)
2762	GDP-mannose 4,6-dehydratase(GMDS)
6282	S100 calcium binding protein A11(S100A11)
5800	protein tyrosine phosphatase, receptor type O(PTPRO)
23423	transmembrane p24 trafficking protein 3(TMED3)
203274	long intergenic non-protein coding RNA 537(LINC00537)
3418	isocitrate dehydrogenase (NADP(+)) 2, mitochondrial(IDH2)
2176	Fanconi anemia complementation group C(FANCC)
2177	Fanconi anemia complementation group D2(FANCD2)
60559	signal peptidase complex subunit 3(SPCS3)
4017	lysyl oxidase like 2(LOXL2)
102465472	microRNA 6787(MIR6787)
4015	lysyl oxidase(LOX)
4016	lysyl oxidase like 1(LOXL1)
9770	Ras association domain family member 2(RASSF2)
56975	FAM20C, golgi associated secretory pathway kinase(FAM20C)
29967	LDL receptor related protein 12(LRP12)
29760	B-cell linker(BLNK)
6279	S100 calcium binding protein A8(S100A8)
9760	thymocyte selection associated high mobility group box(TOX)
2782	G protein subunit beta 1(GNB1)
29095	ORMDL sphingolipid biosynthesis regulator 2(ORMDL2)
4958	osteomodulin(OMD)
83540	NUF2, NDC80 kinetochore complex component(NUF2)
3429	interferon alpha inducible protein 27(IFI27)
10288	leukocyte immunoglobulin like receptor B2(LILRB2)
1633	deoxycytidine kinase(DCK)
55016	membrane associated ring-CH-type finger 1(MARCH1)
11123	RCAN family member 3(RCAN3)
81671	vacuole membrane protein 1(VMP1)
53335	B-cell CLL/lymphoma 11A(BCL11A)
2706	gap junction protein beta 2(GJB2)
4001	lamin B1(LMNB1)
9830	tripartite motif containing 14(TRIM14)
54855	family with sequence similarity 46 member C(FAM46C)
115908	collagen triple helix repeat containing 1(CTHRC1)
9833	maternal embryonic leucine zipper kinase(MELK)
23406	coactosin like F-actin binding protein 1(COTL1)
9103	Fc fragment of IgG receptor IIc (gene/pseudogene)(FCGR2C)
23405	dicer 1, ribonuclease III(DICER1)
9509	ADAM metallopeptidase with thrombospondin type 1 motif 2(ADAMTS2)
8974	prolyl 4-hydroxylase subunit alpha 2(P4HA2)
2191	fibroblast activation protein alpha(FAP)
3635	inositol polyphosphate-5-phosphatase D(INPP5D)
3055	HCK proto-oncogene, Src family tyrosine kinase(HCK)
259266	abnormal spindle microtubule assembly(ASPM)
771	carbonic anhydrase 12(CA12)
79651	rhomboid 5 homolog 2(RHBDF2)
23218	neurobeachin like 2(NBEAL2)
6252	reticulon 1(RTN1)
9780	piezo type mechanosensitive ion channel component 1(PIEZO1)
23601	C-type lectin domain family 5 member A(CLEC5A)
727936	glucoside xylosyltransferase 2(GXYLT2)
9111	N-myc and STAT interactor(NMI)
728215	family with sequence similarity 155 member A(FAM155A)
55704	coiled-coil domain containing 88A(CCDC88A)
6050	ribonuclease/angiogenin inhibitor 1(RNH1)
9787	DLG associated protein 5(DLGAP5)
58191	C-X-C motif chemokine ligand 16(CXCL16)
3662	interferon regulatory factor 4(IRF4)
100996643	monofunctional C1-tetrahydrofolate synthase, mitochondrial-like(LOC100996643)
79668	poly(ADP-ribose) polymerase family member 8(PARP8)
2720	galactosidase beta 1(GLB1)
9535	glia maturation factor gamma(GMFG)
9536	prostaglandin E synthase(PTGES)
6241	ribonucleotide reductase regulatory subunit M2(RRM2)
11174	ADAM metallopeptidase with thrombospondin type 1 motif 6(ADAMTS6)
54829	asporin(ASPN)
3070	helicase, lymphoid-specific(HELLS)
3071	NCK associated protein 1 like(NCKAP1L)
1890	thymidine phosphorylase(TYMP)
6850	spleen associated tyrosine kinase(SYK)
3455	interferon alpha and beta receptor subunit 2(IFNAR2)
2526	fucosyltransferase 4(FUT4)
3659	interferon regulatory factor 1(IRF1)
9120	solute carrier family 16 member 6(SLC16A6)
3671	immunoglobulin superfamily containing leucine rich repeat(ISLR)
79675	FAST kinase domains 1(FASTKD1)
56935	single-pass membrane protein with coiled-coil domains 4(SMCO4)
3059	hematopoietic cell-specific Lyn substrate 1(HCLS1)
9837	GINS complex subunit 1(GINS1)
9834	family with sequence similarity 30, member A(FAM30A)
9839	zinc finger E-box binding homeobox 2(ZEB2)
60526	lipid droplet associated hydrolase(LDAH)
102465801	microRNA 7703(MIR7703)
9134	cyclin E2(CCNE2)
9133	cyclin B2(CCNB2)
2535	frizzled class receptor 2(FZD2)
9516	lipopolysaccharide induced TNF factor(LITAF)
3669	interferon stimulated exonuclease gene 20(ISG20)
2537	interferon alpha inducible protein 6(IFI6)
135228	CD109 molecule(CD109)
79670	zinc finger CCHC-type containing 6(ZCCHC6)
2530	fucosyltransferase 8(FUT8)
2533	FYN binding protein(FYB)
255231	mucolipin 2(MCOLN2)
10346	tripartite motif containing 22(TRIM22)
160364	C-type lectin domain family 12 member A(CLEC12A)
55741	ER degradation enhancing alpha-mannosidase like protein 2(EDEM2)
3929	lipopolysaccharide binding protein(LBP)
64393	zinc finger matrin-type 3(ZMAT3)
23136	erythrocyte membrane protein band 4.1 like 3(EPB41L3)
3920	lysosomal associated membrane protein 2(LAMP2)
6614	sialic acid binding Ig like lectin 1(SIGLEC1)
56913	core 1 synthase, glycoprotein-N-acetylgalactosamine 3-beta-galactosyltransferase 1(C1GALT1)
65244	spermatogenesis associated serine rich 2(SPATS2)
10330	canopy FGF signaling regulator 2(CNPY2)
3710	inositol 1,4,5-trisphosphate receptor type 3(ITPR3)
55754	transmembrane protein 30A(TMEM30A)
4885	neuronal pentraxin 2(NPTX2)
3718	Janus kinase 3(JAK3)
3717	Janus kinase 2(JAK2)
4891	solute carrier family 11 member 2(SLC11A2)
7070	Thy-1 cell surface antigen(THY1)
7072	TIA1 cytotoxic granule associated RNA binding protein(TIA1)
4600	MX dynamin like GTPase 2(MX2)
3910	laminin subunit alpha 4(LAMA4)
7076	TIMP metallopeptidase inhibitor 1(TIMP1)
84689	membrane spanning 4-domains A14(MS4A14)
56925	latexin(LXN)
338773	transmembrane protein 119(TMEM119)
10320	IKAROS family zinc finger 1(IKZF1)
22797	transcription factor EC(TFEC)
5756	twinfilin actin binding protein 1(TWF1)
128346	chromosome 1 open reading frame 162(C1orf162)
22795	nidogen 2(NID2)
10327	aldo-keto reductase family 1 member A1(AKR1A1)
729230	C-C motif chemokine receptor 2(CCR2)
4237	microfibrillar associated protein 2(MFAP2)
10312	T-cell immune regulator 1, ATPase H+ transporting V0 subunit a3(TCIRG1)
54480	chondroitin polymerizing factor 2(CHPF2)
3936	lymphocyte cytosolic protein 1(LCP1)
317649	eukaryotic translation initiation factor 4E family member 3(EIF4E3)
3937	lymphocyte cytosolic protein 2(LCP2)
7058	thrombospondin 2(THBS2)
56901	NDUFA4, mitochondrial complex associated like 2(NDUFA4L2)
3932	LCK proto-oncogene, Src family tyrosine kinase(LCK)
5771	protein tyrosine phosphatase, non-receptor type 2(PTPN2)
28639	T cell receptor beta constant 1(TRBC1)
89790	sialic acid binding Ig like lectin 10(SIGLEC10)
11227	polypeptide N-acetylgalactosaminyltransferase 5(GALNT5)
64151	non-SMC condensin I complex subunit G(NCAPG)
55784	multiple C2 and transmembrane domain containing 2(MCTP2)
10385	butyrophilin subfamily 2 member A2(BTN2A2)
10384	butyrophilin subfamily 3 member A3(BTN3A3)
23178	PAS domain containing serine/threonine kinase(PASK)
2675	GDNF family receptor alpha 2(GFRA2)
4860	purine nucleoside phosphorylase(PNP)
56005	myeloid derived growth factor(MYDGF)
4074	mannose-6-phosphate receptor, cation dependent(M6PR)
9061	3'-phosphoadenosine 5'-phosphosulfate synthase 1(PAPSS1)
9060	3'-phosphoadenosine 5'-phosphosulfate synthase 2(PAPSS2)
23166	stabilin 1(STAB1)
4082	myristoylated alanine rich protein kinase C substrate(MARCKS)
10577	NPC intracellular cholesterol transporter 2(NPC2)
4267	CD99 molecule(CD99)
4261	class II major histocompatibility complex transactivator(CIITA)
55790	chondroitin sulfate N-acetylgalactosaminyltransferase 1(CSGALNACT1)
4642	myosin ID(MYO1D)
3957	galectin 2(LGALS2)
4085	MAD2 mitotic arrest deficient-like 1 (yeast)(MAD2L1)
64167	endoplasmic reticulum aminopeptidase 2(ERAP2)
4644	myosin VA(MYO5A)
3500	immunoglobulin heavy constant gamma 1 (G1m marker)(IGHG1)
4048	leukotriene A4 hydrolase(LTA4H)
3507	immunoglobulin heavy constant mu(IGHM)
23150	FERM domain containing 4B(FRMD4B)
3702	IL2 inducible T-cell kinase(ITK)
23355	VPS8, CORVET complex subunit(VPS8)
3700	inter-alpha-trypsin inhibitor heavy chain family member 4(ITIH4)
23157	septin 6(SEPT6)
4277	MHC class I polypeptide-related sequence B(MICB)
23158	TBC1 domain family member 9(TBC1D9)
4050	lymphotoxin beta(LTB)
10567	Rab acceptor 1(RABAC1)
4053	latent transforming growth factor beta binding protein 2(LTBP2)
4054	latent transforming growth factor beta binding protein 3(LTBP3)
26301	globoside alpha-1,3-N-acetylgalactosaminyltransferase 1(GBGT1)
151888	B and T lymphocyte associated(BTLA)
4864	NPC intracellular cholesterol transporter 1(NPC1)
4671	NLR family apoptosis inhibitory protein(NAIP)
92370	2-phosphoxylose phosphatase 1(PXYLP1)
221336	BEN domain containing 6(BEND6)
4481	macrophage scavenger receptor 1(MSR1)
7764	zinc finger protein 217(ZNF217)
284021	mast cell immunoglobulin like receptor 1(MILR1)
9732	dedicator of cytokinesis 4(DOCK4)
50515	carbohydrate sulfotransferase 11(CHST11)
26586	cytoskeleton associated protein 2(CKAP2)
57082	kinetochore scaffold 1(KNL1)
4282	macrophage migration inhibitory factor (glycosylation-inhibiting factor)(MIF)
4283	C-X-C motif chemokine ligand 9(CXCL9)
7756	zinc finger protein 207(ZNF207)
4060	lumican(LUM)
7096	toll like receptor 1(TLR1)
4065	lymphocyte antigen 75(LY75)
7097	toll like receptor 2(TLR2)
283431	growth arrest specific 2 like 3(GAS2L3)
7090	transducin like enhancer of split 3(TLE3)
4668	alpha-N-acetylgalactosaminidase(NAGA)
4067	LYN proto-oncogene, Src family tyrosine kinase(LYN)
4068	SH2 domain containing 1A(SH2D1A)
4069	lysozyme(LYZ)
7535	zeta chain of T cell receptor associated protein kinase 70(ZAP70)
10130	protein disulfide isomerase family A member 6(PDIA6)
8530	cystatin F(CST7)
200424	tet methylcytosine dioxygenase 3(TET3)
8535	chromobox 4(CBX4)
10549	peroxiredoxin 4(PRDX4)
10548	transmembrane 9 superfamily member 1(TM9SF1)
5163	pyruvate dehydrogenase kinase 1(PDK1)
64116	solute carrier family 39 member 8(SLC39A8)
1396	cysteine rich protein 1(CRIP1)
401494	3-hydroxyacyl-CoA dehydratase 4(HACD4)
10924	sphingomyelin phosphodiesterase acid like 3A(SMPDL3A)
57035	arginine and serine rich protein 1(RSRP1)
140606	selenoprotein M(SELENOM)
445347	TCR gamma alternate reading frame protein(TARP)
54210	triggering receptor expressed on myeloid cells 1(TREM1)
30817	adhesion G protein-coupled receptor E2(ADGRE2)
8542	apolipoprotein L1(APOL1)
64744	small ArfGAP2(SMAP2)
4689	neutrophil cytosolic factor 4(NCF4)
4688	neutrophil cytosolic factor 2(NCF2)
10537	ubiquitin D(UBD)
284207	meteorin like, glial cell differentiation regulator(METRNL)
64127	nucleotide binding oligomerization domain containing 2(NOD2)
55196	KIAA1551(KIAA1551)
114614	MIR155 host gene(MIR155HG)
7940	leukocyte specific transcript 1(LST1)
55191	NAD synthetase 1(NADSYN1)
51816	cat eye syndrome chromosome region, candidate 1(CECR1)
6402	selectin L(SELL)
5552	serglycin(SRGN)
6404	selectin P ligand(SELPLG)
6696	secreted phosphoprotein 1(SPP1)
1378	complement C3b/C4b receptor 1 (Knops blood group)(CR1)
4693	NDP, norrin cystine knot growth factor(NDP)
10525	hypoxia up-regulated 1(HYOU1)
57559	STAM binding protein like 1(STAMBPL1)
493869	glutathione peroxidase 8 (putative)(GPX8)
51203	nucleolar and spindle associated protein 1(NUSAP1)
6401	selectin E(SELE)
6400	SEL1L ERAD E3 ligase adaptor subunit(SEL1L)
1123	chimerin 1(CHN1)
55161	transmembrane protein 33(TMEM33)
55165	centrosomal protein 55(CEP55)
51614	ERGIC and golgi 3(ERGIC3)
27319	basic helix-loop-helix family member e22(BHLHE22)
64919	B-cell CLL/lymphoma 11B(BCL11B)
64333	Rho GTPase activating protein 9(ARHGAP9)
64332	NFKB inhibitor zeta(NFKBIZ)
147372	collagen and calcium binding EGF domains 1(CCBE1)
10112	kinesin family member 20A(KIF20A)
5966	REL proto-oncogene, NF-kB subunit(REL)
597	BCL2 related protein A1(BCL2A1)
8566	pyridoxal (pyridoxine, vitamin B6) kinase(PDXK)
8564	kynurenine 3-monooxygenase(KMO)
10519	calcium and integrin binding 1(CIB1)
147138	transmembrane channel like 8(TMC8)
5567	protein kinase cAMP-activated catalytic subunit beta(PRKACB)
1116	chitinase 3 like 1(CHI3L1)
1117	chitinase 3 like 2(CHI3L2)
84419	chromosome 15 open reading frame 48(C15orf48)
25816	TNF alpha induced protein 8(TNFAIP8)
6676	sperm associated antigen 4(SPAG4)
154075	sterile alpha motif domain containing 3(SAMD3)
397	Rho GDP dissociation inhibitor beta(ARHGDIB)
10123	ADP ribosylation factor like GTPase 4C(ARL4C)
399	ras homolog family member H(RHOH)
10125	RAS guanyl releasing protein 1(RASGRP1)
56675	nuclear receptor interacting protein 3(NRIP3)
5579	protein kinase C beta(PRKCB)
6659	SRY-box 4(SOX4)
5578	protein kinase C alpha(PRKCA)
56672	A-kinase interacting protein 1(AKIP1)
5993	regulatory factor X5(RFX5)
10507	semaphorin 4D(SEMA4D)
55589	BMP2 inducible kinase(BMP2K)
64778	fibronectin type III domain containing 3B(FNDC3B)
201799	transmembrane protein 154(TMEM154)
51466	Enah/Vasp-like(EVL)
26127	FGFR1 oncogene partner 2(FGFR1OP2)
57333	reticulocalbin 3(RCN3)
283897	chromosome 16 open reading frame 54(C16orf54)
5777	protein tyrosine phosphatase, non-receptor type 6(PTPN6)
5778	protein tyrosine phosphatase, non-receptor type 7(PTPN7)
7903	ST8 alpha-N-acetyl-neuraminide alpha-2,8-sialyltransferase 4(ST8SIA4)
51465	ubiquitin conjugating enzyme E2 J1(UBE2J1)
7905	receptor accessory protein 5(REEP5)
5795	protein tyrosine phosphatase, receptor type J(PTPRJ)
257106	Rho GTPase activating protein 30(ARHGAP30)
7503	X inactive specific transcript (non-protein coding)(XIST)
51056	leucine aminopeptidase 3(LAP3)
378	ADP ribosylation factor 4(ARF4)
25878	matrix remodeling associated 5(MXRA5)
7305	TYRO protein tyrosine kinase binding protein(TYROBP)
377	ADP ribosylation factor 3(ARF3)
6447	secretogranin V(SCG5)
5788	protein tyrosine phosphatase, receptor type C(PTPRC)
6653	sortilin related receptor 1(SORL1)
5594	mitogen-activated protein kinase 1(MAPK1)
6444	sarcoglycan delta(SGCD)
54436	SH3 domain and tetratricopeptide repeats 1(SH3TC1)
27350	apolipoprotein B mRNA editing enzyme catalytic subunit 3C(APOBEC3C)
3903	leukocyte associated immunoglobulin like receptor 1(LAIR1)
64759	tensin 3(TNS3)
366	aquaporin 9(AQP9)
8795	TNF receptor superfamily member 10b(TNFRSF10B)
64761	poly(ADP-ribose) polymerase family member 12(PARP12)
4200	malic enzyme 2(ME2)
26781	small nucleolar RNA, H/ACA box 67(SNORA67)
64105	centromere protein K(CENPK)
168455	coiled-coil domain containing 71-like(CCDC71L)
54440	SAM and SH3 domain containing 3(SASH3)
55577	N-acetylglucosamine kinase(NAGK)
54443	anillin actin binding protein(ANLN)
57502	neuroligin 4, X-linked(NLGN4X)
5996	regulator of G-protein signaling 1(RGS1)
355	Fas cell surface death receptor(FAS)
5998	regulator of G-protein signaling 3(RGS3)
7009	transmembrane BAX inhibitor motif containing 6(TMBIM6)
1164	CDC28 protein kinase regulatory subunit 2(CKS2)
2210	Fc fragment of IgG receptor Ib(FCGR1B)
51379	cytokine receptor like factor 3(CRLF3)
5230	phosphoglycerate kinase 1(PGK1)
29127	Rac GTPase activating protein 1(RACGAP1)
6772	signal transducer and activator of transcription 1(STAT1)
29126	CD274 molecule(CD274)
6773	signal transducer and activator of transcription 2(STAT2)
1317	solute carrier family 31 member 1(SLC31A1)
10609	prolyl 3-hydroxylase family member 4 (non-enzymatic)(P3H4)
8320	eomesodermin(EOMES)
6352	C-C motif chemokine ligand 5(CCL5)
6351	C-C motif chemokine ligand 4(CCL4)
6357	C-C motif chemokine ligand 13(CCL13)
51176	lymphoid enhancer binding factor 1(LEF1)
6355	C-C motif chemokine ligand 8(CCL8)
51177	pleckstrin homology domain containing O1(PLEKHO1)
29128	ubiquitin like with PHD and ring finger domains 1(UHRF1)
2207	Fc fragment of IgE receptor Ig(FCER1G)
11098	protease, serine 23(PRSS23)
8879	sphingosine-1-phosphate lyase 1(SGPL1)
2203	fructose-bisphosphatase 1(FBP1)
8600	tumor necrosis factor superfamily member 11(TNFSF11)
202	absent in melanoma 1(AIM1)
27071	dual adaptor of phosphotyrosine and 3-phosphoinositides 1(DAPP1)
6782	heat shock protein family A (Hsp70) member 13(HSPA13)
5223	phosphoglycerate mutase 1(PGAM1)
8111	G protein-coupled receptor 68(GPR68)
27074	lysosomal associated membrane protein 3(LAMP3)
79713	IGF like family receptor 1(IGFLR1)
165	AE binding protein 1(AEBP1)
57214	cell migration inducing hyaluronan binding protein(CEMIP)
340419	R-spondin 2(RSPO2)
6362	C-C motif chemokine ligand 18(CCL18)
26002	monooxygenase DBH like 1(MOXD1)
6363	C-C motif chemokine ligand 19(CCL19)
2215	Fc fragment of IgG receptor IIIb(FCGR3B)
2212	Fc fragment of IgG receptor IIa(FCGR2A)
2841	G protein-coupled receptor 18(GPR18)
2214	Fc fragment of IgG receptor IIIa(FCGR3A)
5216	profilin 1(PFN1)
2213	Fc fragment of IgG receptor IIb(FCGR2B)
822	capping actin protein, gelsolin like(CAPG)
10870	hematopoietic cell signal transducer(HCST)
55118	cartilage acidic protein 1(CRTAC1)
214	activated leukocyte cell adhesion molecule(ALCAM)
58489	abhydrolase domain containing 17C(ABHD17C)
51192	chemokine like factor(CKLF)
51393	transient receptor potential cation channel subfamily V member 2(TRPV2)
27286	sushi repeat containing protein, X-linked 2(SRPX2)
6375	X-C motif chemokine ligand 1(XCL1)
175	aspartylglucosaminidase(AGA)
6373	C-X-C motif chemokine ligand 11(CXCL11)
6372	C-X-C motif chemokine ligand 6(CXCL6)
6748	signal sequence receptor subunit 4(SSR4)
6747	signal sequence receptor subunit 3(SSR3)
6745	signal sequence receptor subunit 1(SSR1)
629	complement factor B(CFB)
813	calumenin(CALU)
58477	SRP receptor beta subunit(SRPRB)
132671	spermatogenesis associated 18(SPATA18)
55103	Ral GEF with PH domain and SH3 binding motif 2(RALGPS2)
1303	collagen type XII alpha 1 chain(COL12A1)
94081	sideroflexin 1(SFXN1)
23526	Rho GTPase activating protein 45(ARHGAP45)
6387	C-X-C motif chemokine ligand 12(CXCL12)
100505498	uncharacterized LOC100505498(LOC100505498)
129607	cytidine/uridine monophosphate kinase 2(CMPK2)
387882	chromosome 12 open reading frame 75(C12orf75)
27299	ADAM like decysin 1(ADAMDEC1)
58475	membrane spanning 4-domains A7(MS4A7)
6382	syndecan 1(SDC1)
8847	deleted in lymphocytic leukemia 2 (non-protein coding)(DLEU2)
841	caspase 8(CASP8)
3111	major histocompatibility complex, class II, DO alpha(HLA-DOA)
3112	major histocompatibility complex, class II, DO beta(HLA-DOB)
10855	heparanase(HPSE)
113	adenylate cyclase 7(ADCY7)
3385	intercellular adhesion molecule 3(ICAM3)
84958	synaptotagmin like 1(SYTL1)
8635	ribonuclease T2(RNASET2)
5912	RAP2B, member of RAS oncogene family(RAP2B)
3381	integrin binding sialoprotein(IBSP)
8840	WNT1 inducible signaling pathway protein 1(WISP1)
57580	phosphatidylinositol-3,4,5-trisphosphate dependent Rac exchange factor 1(PREX1)
7456	WAS/WASL interacting protein family member 1(WIPF1)
10653	serine peptidase inhibitor, Kunitz type 2(SPINT2)
8836	gamma-glutamyl hydrolase(GGH)
2896	granulin precursor(GRN)
3107	major histocompatibility complex, class I, C(HLA-C)
3106	major histocompatibility complex, class I, B(HLA-B)
3109	major histocompatibility complex, class II, DM beta(HLA-DMB)
3108	major histocompatibility complex, class II, DM alpha(HLA-DMA)
55332	DNA damage regulated autophagy modulator 1(DRAM1)
26031	oxysterol binding protein like 3(OSBPL3)
6398	secreted and transmembrane 1(SECTM1)
3105	major histocompatibility complex, class I, A(HLA-A)
100131541	uncharacterized LOC100131541(LOC100131541)
3101	hexokinase 3(HK3)
10866	HLA complex P5 (non-protein coding)(HCP5)
10863	ADAM metallopeptidase domain 28(ADAM28)
837	caspase 4(CASP4)
834	caspase 1(CASP1)
3394	interferon regulatory factor 8(IRF8)
5920	retinoic acid receptor responder 3(RARRES3)
60489	apolipoprotein B mRNA editing enzyme catalytic subunit 3G(APOBEC3G)
94241	tumor protein p53 inducible nuclear protein 1(TP53INP1)
645784	ankyrin repeat domain 36B pseudogene 2(ANKRD36BP2)
94240	epithelial stromal interaction 1(EPSTI1)
8828	neuropilin 2(NRP2)
9214	Fc fragment of IgM receptor(FCMR)
51129	angiopoietin like 4(ANGPTL4)
2885	growth factor receptor bound protein 2(GRB2)
6195	ribosomal protein S6 kinase A1(RPS6KA1)
860	runt related transcription factor 2(RUNX2)
864	runt related transcription factor 3(RUNX3)
81704	dedicator of cytokinesis 8(DOCK8)
27040	linker for activation of T-cells(LAT)
6793	serine/threonine kinase 10(STK10)
29100	transmembrane protein 208(TMEM208)
7474	Wnt family member 5A(WNT5A)
28959	transmembrane protein 176B(TMEM176B)
9473	thymocyte selection associated family member 2(THEMIS2)
6789	serine/threonine kinase 4(STK4)
10630	podoplanin(PDPN)
10631	periostin(POSTN)
2876	glutathione peroxidase 1(GPX1)
29108	PYD and CARD domain containing(PYCARD)
54502	RNA binding motif protein 47(RBM47)
10635	RAD51 associated protein 1(RAD51AP1)
54504	carboxypeptidase, vitellogenic like(CPVL)
51150	stromal cell derived factor 4(SDF4)
3371	tenascin C(TNC)
54900	lymphocyte transmembrane adaptor 1(LAX1)
27436	echinoderm microtubule associated protein like 4(EML4)
6999	tryptophan 2,3-dioxygenase(TDO2)
84969	TOX high mobility group box family member 2(TOX2)
7462	linker for activation of T-cells family member 2(LAT2)
219285	sterile alpha motif domain containing 9 like(SAMD9L)
84166	NLR family CARD domain containing 5(NLRC5)
9466	interleukin 27 receptor subunit alpha(IL27RA)
221830	TWIST neighbor(TWISTNB)
7291	twist family bHLH transcription factor 1(TWIST1)
2643	GTP cyclohydrolase 1(GCH1)
28396	immunoglobulin heavy variable 4-31(IGHV4-31)
682	basigin (Ok blood group)(BSG)
83872	hemicentin 1(HMCN1)
7298	thymidylate synthetase(TYMS)
9246	ubiquitin conjugating enzyme E2 L6(UBE2L6)
11010	GLI pathogenesis related 1(GLIPR1)
9450	lymphocyte antigen 86(LY86)
11015	KDEL endoplasmic reticulum protein retention receptor 3(KDELR3)
9046	docking protein 2(DOK2)
3537	immunoglobulin lambda constant 1(IGLC1)
1522	cathepsin Z(CTSZ)
2297	forkhead box D1(FOXD1)
4820	natural killer cell triggering receptor(NKTR)
11014	KDEL endoplasmic reticulum protein retention receptor 2(KDELR2)
1520	cathepsin S(CTSS)
10159	ATPase H+ transporting accessory protein 2(ATP6AP2)
10154	plexin C1(PLXNC1)
4199	malic enzyme 1(ME1)
9636	ISG15 ubiquitin-like modifier(ISG15)
9448	mitogen-activated protein kinase kinase kinase kinase 4(MAP4K4)
3135	major histocompatibility complex, class I, G(HLA-G)
9447	absent in melanoma 2(AIM2)
9446	glutathione S-transferase omega 1(GSTO1)
3137	major histocompatibility complex, class I, J (pseudogene)(HLA-J)
100423062	immunoglobulin lambda like polypeptide 5(IGLL5)
1794	dedicator of cytokinesis 2(DOCK2)
83666	poly(ADP-ribose) polymerase family member 9(PARP9)
1514	cathepsin L(CTSL)
11006	leukocyte immunoglobulin like receptor B4(LILRB4)
1513	cathepsin K(CTSK)
9056	solute carrier family 7 member 7(SLC7A7)
79158	N-acetylglucosamine-1-phosphate transferase alpha and beta subunits(GNPTAB)
1512	cathepsin H(CTSH)
80228	ORAI calcium release-activated calcium modulator 2(ORAI2)
4830	NME/NM23 nucleoside diphosphate kinase 1(NME1)
23312	Dmx like 2(DMXL2)
9645	microtubule associated monooxygenase, calponin and LIM domain containing 2(MICAL2)
871	serpin family H member 1(SERPINH1)
9055	protein regulator of cytokinesis 1(PRC1)
3140	major histocompatibility complex, class I-related(MR1)
2621	growth arrest specific 6(GAS6)
3126	major histocompatibility complex, class II, DR beta 4(HLA-DRB4)
10170	dehydrogenase/reductase 9(DHRS9)
283459	glutamyl-tRNA amidotransferase subunit C(GATC)
406991	microRNA 21(MIR21)
6184	ribophorin I(RPN1)
112770	glycosylated lysosomal membrane protein(GLMP)
3128	major histocompatibility complex, class II, DR beta 6 (pseudogene)(HLA-DRB6)
10673	tumor necrosis factor superfamily member 13b(TNFSF13B)
2268	FGR proto-oncogene, Src family tyrosine kinase(FGR)
56886	UDP-glucose glycoprotein glucosyltransferase 1(UGGT1)
6185	ribophorin II(RPN2)
158402	uncharacterized LOC158402(LOC158402)
54739	XIAP associated factor 1(XAF1)
11031	RAB31, member RAS oncogene family(RAB31)
9902	mannose receptor C type 2(MRC2)
3512	joining chain of multimeric IgA and IgM(JCHAIN)
81552	vesicular, overexpressed in cancer, prosurvival protein 1(VOPP1)
9023	cholesterol 25-hydroxylase(CH25H)
3514	immunoglobulin kappa constant(IGKC)
286827	tripartite motif containing 59(TRIM59)
145508	centrosomal protein 128(CEP128)
3134	major histocompatibility complex, class I, F(HLA-F)
1509	cathepsin D(CTSD)
1508	cathepsin B(CTSB)
100500810	microRNA 3620(MIR3620)
3113	major histocompatibility complex, class II, DP alpha 1(HLA-DPA1)
695	Bruton tyrosine kinase(BTK)
9424	potassium two pore domain channel subfamily K member 6(KCNK6)
79770	thioredoxin domain containing 15(TXNDC15)
3115	major histocompatibility complex, class II, DP beta 1(HLA-DPB1)
10180	RNA binding motif protein 6(RBM6)
4174	minichromosome maintenance complex component 5(MCM5)
3117	major histocompatibility complex, class II, DQ alpha 1(HLA-DQA1)
2633	guanylate binding protein 1(GBP1)
55303	GTPase, IMAP family member 4(GIMAP4)
3119	major histocompatibility complex, class II, DQ beta 1(HLA-DQB1)
2635	guanylate binding protein 3(GBP3)
81539	solute carrier family 38 member 1(SLC38A1)
9235	interleukin 32(IL32)
9232	pituitary tumor-transforming 1(PTTG1)
79139	derlin 1(DERL1)
100507463	PSMB8 antisense RNA 1 (head to head)(PSMB8-AS1)
9034	C-C motif chemokine receptor like 2(CCRL2)
79961	DENN domain containing 2D(DENND2D)
894	cyclin D2(CCND2)
891	cyclin B1(CCNB1)
54941	ring finger protein 125(RNF125)
896	cyclin D3(CCND3)
3122	major histocompatibility complex, class II, DR alpha(HLA-DRA)
9966	tumor necrosis factor superfamily member 15(TNFSF15)
56253	cytotoxic and regulatory T-cell molecule(CRTAM)
649	bone morphogenetic protein 1(BMP1)
340152	zinc finger CCCH-type containing 12D(ZC3H12D)
79958	DENN domain containing 1C(DENND1C)
3778	potassium calcium-activated channel subfamily M alpha 1(KCNMA1)
131578	leucine rich repeat containing 15(LRRC15)
199	allograft inflammatory factor 1(AIF1)
80005	dedicator of cytokinesis 5(DOCK5)
11057	abhydrolase domain containing 2(ABHD2)
3575	interleukin 7 receptor(IL7R)
79953	synapse differentiation inducing 1(SYNDIG1)
3576	C-X-C motif chemokine ligand 8(CXCL8)
3594	interleukin 12 receptor subunit beta 1(IL12RB1)
80279	CDK5 regulatory subunit associated protein 3(CDK5RAP3)
29887	sorting nexin 10(SNX10)
639	PR/SET domain 1(PRDM1)
11040	Pim-2 proto-oncogene, serine/threonine kinase(PIM2)
637	BH3 interacting domain death agonist(BID)
2617	glycyl-tRNA synthetase(GARS)
633	biglycan(BGN)
9404	leupaxin(LPXN)
6932	transcription factor 7 (T-cell specific, HMG-box)(TCF7)
9961	major vault protein(MVP)
3587	interleukin 10 receptor subunit alpha(IL10RA)
28755	T-cell receptor alpha constant(TRAC)
79161	transmembrane protein 243(TMEM243)
79365	basic helix-loop-helix family member e41(BHLHE41)
3561	interleukin 2 receptor subunit gamma(IL2RG)
3560	interleukin 2 receptor subunit beta(IL2RB)
9262	serine/threonine kinase 17b(STK17B)
9263	serine/threonine kinase 17a(STK17A)
1540	CYLD lysine 63 deubiquitinase(CYLD)
79930	docking protein 3(DOK3)
9953	heparan sulfate-glucosamine 3-sulfotransferase 3B1(HS3ST3B1)
406948	microRNA 15a(MIR15A)
53831	G protein-coupled receptor 84(GPR84)
3557	interleukin 1 receptor antagonist(IL1RN)
79174	cysteine rich with EGF like domains 2(CRELD2)
9938	Rho GTPase activating protein 25(ARHGAP25)
6715	steroid 5 alpha-reductase 1(SRD5A1)
56833	SLAM family member 8(SLAMF8)
6713	squalene epoxidase(SQLE)
727820	uncharacterized LOC727820(LOC727820)
163486	DENN domain containing 1B(DENND1B)
100033819	microRNA 675(MIR675)
3772	potassium voltage-gated channel subfamily J member 15(KCNJ15)
55824	phosphoprotein membrane anchor with glycosphingolipid microdomains 1(PAG1)
3161	hyaluronan mediated motility receptor(HMMR)
100500842	microRNA 3652(MIR3652)
80896	N-acetylneuraminate pyruvate lyase(NPL)
53827	FXYD domain containing ion transport regulator 5(FXYD5)
1535	cytochrome b-245 alpha chain(CYBA)
1536	cytochrome b-245 beta chain(CYBB)
83641	family with sequence similarity 107 member B(FAM107B)
10205	myelin protein zero like 2(MPZL2)
64094	SPARC related modular calcium binding 2(SMOC2)
1476	cystatin B(CSTB)
64092	SAM domain, SH3 domain and nuclear localization signals 1(SAMSN1)
55840	ELL associated factor 2(EAF2)
51571	family with sequence similarity 49 member B(FAM49B)
2335	fibronectin 1(FN1)
10483	Sec23 homolog B, coat complex II component(SEC23B)
89857	kelch like family member 6(KLHL6)
7163	tumor protein D52(TPD52)
11320	mannosyl (alpha-1,3-)-glycoprotein beta-1,4-N-acetylglucosaminyltransferase, isozyme A(MGAT4A)
11322	transmembrane channel like 6(TMC6)
64098	parvin gamma(PARVG)
92610	TRAF interacting protein with forkhead associated domain(TIFA)
51561	interleukin 23 subunit alpha(IL23A)
83416	Fc receptor like 5(FCRL5)
100529251	CKLF-CMTM1 readthrough(CKLF-CMTM1)
89845	ATP binding cassette subfamily C member 10(ABCC10)
89846	FYVE, RhoGEF and PH domain containing 3(FGD3)
89849	autophagy related 16 like 2(ATG16L2)
28517	T cell receptor delta variable 2(TRDV2)
4124	mannosidase alpha class 2A member 1(MAN2A1)
11332	acyl-CoA thioesterase 7(ACOT7)
7171	tropomyosin 4(TPM4)
83706	fermitin family member 3(FERMT3)
11335	chromobox 3(CBX3)
1452	casein kinase 1 alpha 1(CSNK1A1)
1075	cathepsin C(CTSC)
5611	DnaJ heat shock protein family (Hsp40) member C3(DNAJC3)
5613	protein kinase, X-linked(PRKX)
643977	uncharacterized LOC643977(FLJ32255)
1997	E74 like ETS transcription factor 1(ELF1)
25903	olfactomedin like 2B(OLFML2B)
2596	growth associated protein 43(GAP43)
83716	cysteine rich secretory protein LCCL domain containing 2(CRISPLD2)
7184	heat shock protein 90 beta family member 1(HSP90B1)
401115	chromosome 4 open reading frame 48(C4orf48)
9991	polypyrimidine tract binding protein 3(PTBP3)
55872	PDZ binding kinase(PBK)
9997	SCO2, cytochrome c oxidase assembly protein(SCO2)
114088	tripartite motif containing 9(TRIM9)
10212	DExD-box helicase 39A(DDX39A)
3832	kinesin family member 11(KIF11)
124935	solute carrier family 43 member 2(SLC43A2)
2589	polypeptide N-acetylgalactosaminyltransferase 1(GALNT1)
9180	oncostatin M receptor(OSMR)
100190986	uncharacterized LOC100190986(LOC100190986)
3627	C-X-C motif chemokine ligand 10(CXCL10)
100526836	BLOC1S5-TXNDC5 readthrough (NMD candidate)(BLOC1S5-TXNDC5)
9601	protein disulfide isomerase family A member 4(PDIA4)
3620	indoleamine 2,3-dioxygenase 1(IDO1)
83442	SH3 domain binding glutamate rich protein like 3(SH3BGRL3)
4758	neuraminidase 1(NEU1)
83937	Ras association domain family member 4(RASSF4)
221472	FYVE, RhoGEF and PH domain containing 2(FGD2)
55603	family with sequence similarity 46 member A(FAM46A)
23231	SEL1L family member 3(SEL1L3)
7852	C-X-C motif chemokine receptor 4(CXCR4)
23225	nucleoporin 210(NUP210)
10234	leucine rich repeat containing 17(LRRC17)
253832	zinc finger DHHC-type containing 20(ZDHHC20)
10437	IFI30, lysosomal thiol reductase(IFI30)
54757	FAM20A, golgi associated secretory pathway pseudokinase(FAM20A)
286336	family with sequence similarity 78 member A(FAM78A)
4358	MPV17, mitochondrial inner membrane protein(MPV17)
55619	dedicator of cytokinesis 10(DOCK10)
4332	myeloid cell nuclear differentiation antigen(MNDA)
2359	formyl peptide receptor 3(FPR3)
2357	formyl peptide receptor 1(FPR1)
4125	mannosidase alpha class 2B member 1(MAN2B1)
4542	myosin IF(MYO1F)
3600	interleukin 15(IL15)
79415	chromosome 17 open reading frame 62(C17orf62)
100529209	RNASEK-C17orf49 readthrough(RNASEK-C17orf49)
10261	immunoglobulin superfamily member 6(IGSF6)
117289	T-cell activation RhoGTPase activating protein(TAGAP)
4327	matrix metallopeptidase 19(MMP19)
7873	mesencephalic astrocyte derived neurotrophic factor(MANF)
10462	C-type lectin domain family 10 member A(CLEC10A)
261729	STEAP2 metalloreductase(STEAP2)
440823	myocardial infarction associated transcript (non-protein coding)(MIAT)
11118	butyrophilin subfamily 3 member A2(BTN3A2)
11119	butyrophilin subfamily 3 member A1(BTN3A1)
11117	elastin microfibril interfacer 1(EMILIN1)
11314	CD300a molecule(CD300A)
653361	neutrophil cytosolic factor 1(NCF1)
80342	TRAF3 interacting protein 3(TRAF3IP3)
53	acid phosphatase 2, lysosomal(ACP2)
10457	glycoprotein nmb(GPNMB)
54	acid phosphatase 5, tartrate resistant(ACP5)
10451	vav guanine nucleotide exchange factor 3(VAV3)
64859	nucleic acid binding protein 1(NABP1)
1292	collagen type VI alpha 2 chain(COL6A2)
1290	collagen type V alpha 2 chain(COL5A2)
26088	golgi associated, gamma adaptin ear containing, ARF binding protein 1(GGA1)
55041	pleckstrin homology domain containing B2(PLEKHB2)
200185	keratinocyte associated protein 2(KRTCAP2)
6556	solute carrier family 11 member 1(SLC11A1)
1295	collagen type VIII alpha 1 chain(COL8A1)
57674	ring finger protein 213(RNF213)
10403	NDC80, kinetochore complex component(NDC80)
1009	cadherin 11(CDH11)
489	ATPase sarcoplasmic/endoplasmic reticulum Ca2+ transporting 3(ATP2A3)
10409	brain abundant membrane attached signal protein 1(BASP1)
8673	vesicle associated membrane protein 8(VAMP8)
23468	chromobox 5(CBX5)
160428	aldehyde dehydrogenase 1 family member L2(ALDH1L2)
90701	SEC11 homolog C, signal peptidase complex subunit(SEC11C)
7804	LDL receptor related protein 8(LRP8)
1289	collagen type V alpha 1 chain(COL5A1)
7805	lysosomal protein transmembrane 5(LAPTM5)
4314	matrix metallopeptidase 3(MMP3)
4313	matrix metallopeptidase 2(MMP2)
10808	heat shock protein family H (Hsp110) member 1(HSPH1)
1281	collagen type III alpha 1 chain(COL3A1)
4312	matrix metallopeptidase 1(MMP1)
6546	solute carrier family 8 member A1(SLC8A1)
1284	collagen type IV alpha 2 chain(COL4A2)
23471	translocation associated membrane protein 1(TRAM1)
475	antioxidant 1 copper chaperone(ATOX1)
5034	prolyl 4-hydroxylase subunit beta(P4HB)
272	adenosine monophosphate deaminase 3(AMPD3)
8685	macrophage receptor with collagenous structure(MARCO)
474344	GTPase, IMAP family member 6(GIMAP6)
5027	purinergic receptor P2X 7(P2RX7)
7412	vascular cell adhesion molecule 1(VCAM1)
64407	regulator of G-protein signaling 18(RGS18)
5832	aldehyde dehydrogenase 18 family member A1(ALDH18A1)
472	ATM serine/threonine kinase(ATM)
1277	collagen type I alpha 1 chain(COL1A1)
57168	aspartate beta-hydroxylase domain containing 2(ASPHD2)
5450	POU class 2 associating factor 1(POU2AF1)
1278	collagen type I alpha 2 chain(COL1A2)
4322	matrix metallopeptidase 13(MMP13)
5452	POU class 2 homeobox 2(POU2F2)
26872	STEAP family member 1(STEAP1)
81037	CLPTM1 like(CLPTM1L)
8650	NUMB, endocytic adaptor protein(NUMB)
57699	copine 5(CPNE5)
23480	Sec61 translocon gamma subunit(SEC61G)
197358	NLR family CARD domain containing 3(NLRC3)
8655	dynein light chain LC8-type 1(DYNLL1)
51303	FK506 binding protein 11(FKBP11)
7421	vitamin D (1,25- dihydroxyvitamin D3) receptor(VDR)
7424	vascular endothelial growth factor C(VEGFC)
23092	Rho GTPase activating protein 26(ARHGAP26)
116984	ArfGAP with RhoGAP domain, ankyrin repeat and PH domain 2(ARAP2)
84513	phospholipid phosphatase 5(PLPP5)
10018	BCL2 like 11(BCL2L11)
101	ADAM metallopeptidase domain 8(ADAM8)
5699	proteasome subunit beta 10(PSMB10)
114548	NLR family pyrin domain containing 3(NLRP3)
5698	proteasome subunit beta 9(PSMB9)
10802	SEC24 homolog A, COPII coat complex component(SEC24A)
55076	transmembrane protein 45A(TMEM45A)
26270	F-box protein 6(FBXO6)
54549	sidekick cell adhesion molecule 2(SDK2)
51703	acyl-CoA synthetase long-chain family member 5(ACSL5)
124460	sorting nexin 20(SNX20)
2799	glucosamine (N-acetyl)-6-sulfatase(GNS)
290	alanyl aminopeptidase, membrane(ANPEP)
100132417	Fc fragment of IgG receptor Ic, pseudogene(FCGR1CP)
58527	ABRA C-terminal like(ABRACL)
51316	placenta specific 8(PLAC8)
7107	G protein-coupled receptor 137B(GPR137B)
100505549	uncharacterized LOC100505549(LOC100505549)
6574	solute carrier family 20 member 1(SLC20A1)
51311	toll like receptor 8(TLR8)
57407	NmrA like redox sensor 1(NMRAL1)
64420	sushi domain containing 1(SUSD1)
50802	immunoglobulin kappa locus(IGK)
54552	G protein nucleolar 3 like(GNL3L)
240	arachidonate 5-lipoxygenase(ALOX5)
91526	ankyrin repeat domain 44(ANKRD44)
55686	melanoregulin(MREG)
114769	caspase recruitment domain family member 16(CARD16)
6518	solute carrier family 2 member 5(SLC2A5)
27230	stress associated endoplasmic reticulum protein 1(SERP1)
5479	peptidylprolyl isomerase B(PPIB)
84102	solute carrier family 41 member 2(SLC41A2)
85377	MICAL like 1(MICALL1)
6320	C-type lectin domain family 11 member A(CLEC11A)
441168	family with sequence similarity 26 member F(FAM26F)
6513	solute carrier family 2 member 1(SLC2A1)
5265	serpin family A member 1(SERPINA1)
7130	TNF alpha induced protein 6(TNFAIP6)
5880	ras-related C3 botulinum toxin substrate 2 (rho family, small GTP binding protein Rac2)(RAC2)
30008	EGF containing fibulin like extracellular matrix protein 2(EFEMP2)
6310	ataxin 1(ATXN1)
55092	transmembrane protein 51(TMEM51)
30001	endoplasmic reticulum oxidoreductase 1 alpha(ERO1A)
441155	zinc finger CCCH-type domain-containing-like(LOC441155)
6503	Src-like-adaptor(SLA)
5696	proteasome subunit beta 8(PSMB8)
6504	signaling lymphocytic activation molecule family member 1(SLAMF1)
1234	C-C motif chemokine receptor 5 (gene/pseudogene)(CCR5)
153339	transmembrane protein 167A(TMEM167A)
1236	C-C motif chemokine receptor 7(CCR7)
5270	serpin family E member 2(SERPINE2)
286530	purinergic receptor P2Y8(P2RY8)
1043	CD52 molecule(CD52)
7128	TNF alpha induced protein 3(TNFAIP3)
58505	oligosaccharyltransferase complex non-catalytic subunit(OSTC)
200916	ribosomal protein L22 like 1(RPL22L1)
91319	derlin 3(DERL3)
91316	glucuronidase, beta pseudogene 11(GUSBP11)
65108	MARCKS like 1(MARCKSL1)
5873	RAB27A, member RAS oncogene family(RAB27A)
91353	immunoglobulin lambda like polypeptide 3, pseudogene(IGLL3P)
133619	proline rich coiled-coil 1(PRRC1)
1230	C-C motif chemokine receptor 1(CCR1)
51752	endoplasmic reticulum aminopeptidase 1(ERAP1)
91351	DEAD-box helicase 60-like(DDX60L)
120939	transmembrane protein 52B(TMEM52B)
1033	cyclin dependent kinase inhibitor 3(CDKN3)
151556	G protein-coupled receptor 155(GPR155)
256380	sex comb on midleg-like 4 (Drosophila)(SCML4)
64231	membrane spanning 4-domains A6A(MS4A6A)
100505702	long intergenic non-protein coding RNA 1094(LINC01094)
25953	paroxysmal nonkinesigenic dyskinesia(PNKD)
148170	CDC42 effector protein 5(CDC42EP5)
118788	phosphoinositide-3-kinase adaptor protein 1(PIK3AP1)
94039	zinc finger protein 101(ZNF101)
26230	T-cell lymphoma invasion and metastasis 2(TIAM2)
121551	BTB domain containing 11(BTBD11)
7153	topoisomerase (DNA) II alpha(TOP2A)
5293	phosphatidylinositol-4,5-bisphosphate 3-kinase catalytic subunit delta(PIK3CD)
100506403	uncharacterized LOC100506403(LOC100506403)
5294	phosphatidylinositol-4,5-bisphosphate 3-kinase catalytic subunit gamma(PIK3CG)

## Sheet: DOWNREGULATED_GENES
EntrezID	Gene Name
1410	crystallin alpha B(CRYAB)
338	apolipoprotein B(APOB)
3280	hes family bHLH transcription factor 1(HES1)
63924	cell death inducing DFFA like effector c(CIDEC)
155370	Shwachman-Bodian-Diamond syndrome pseudogene 1(SBDSP1)
947	CD34 molecule(CD34)
5376	peripheral myelin protein 22(PMP22)
948	CD36 molecule(CD36)
85463	zinc finger CCCH-type containing 12C(ZC3H12C)
8425	latent transforming growth factor beta binding protein 4(LTBP4)
744	metallophosphoesterase domain containing 2(MPPED2)
6495	SIX homeobox 1(SIX1)
6095	RAR related orphan receptor A(RORA)
8406	sushi repeat containing protein, X-linked(SRPX)
55225	ribonucleoprotein, PTB binding 2(RAVER2)
23645	protein phosphatase 1 regulatory subunit 15A(PPP1R15A)
118987	PDZ domain containing 8(PDZD8)
3489	insulin like growth factor binding protein 6(IGFBP6)
3488	insulin like growth factor binding protein 5(IGFBP5)
347	apolipoprotein D(APOD)
5358	plastin 3(PLS3)
7345	ubiquitin C-terminal hydrolase L1(UCHL1)
6876	transgelin(TAGLN)
85477	scinderin(SCIN)
79611	acyl-CoA synthetase short-chain family member 3(ACSS3)
730	complement C7(C7)
2949	glutathione S-transferase mu 5(GSTM5)
84293	family with sequence similarity 213 member A(FAM213A)
316	aldehyde oxidase 1(AOX1)
166647	adhesion G protein-coupled receptor A3(ADGRA3)
928	CD9 molecule(CD9)
5354	proteolipid protein 1(PLP1)
57224	NHS like 1(NHSL1)
5350	phospholamban(PLN)
8766	RAB11A, member RAS oncogene family(RAB11A)
729	complement C6(C6)
2977	guanylate cyclase 1 soluble subunit alpha 2(GUCY1A2)
84886	chromosome 1 open reading frame 198(C1orf198)
5348	FXYD domain containing ion transport regulator 1(FXYD1)
100506965	Prader Willi/Angelman region RNA 6(PWAR6)
5346	perilipin 1(PLIN1)
51299	neuritin 1(NRN1)
1846	dual specificity phosphatase 4(DUSP4)
79625	neuron derived neurotrophic factor(NDNF)
121227	leucine rich repeats and immunoglobulin like domains 3(LRIG3)
10079	ATPase phospholipid transporting 9A (putative)(ATP9A)
85458	DIX domain containing 1(DIXDC1)
5339	plectin(PLEC)
10742	retinoic acid induced 2(RAI2)
8745	ADAM metallopeptidase domain 23(ADAM23)
28231	solute carrier organic anion transporter family member 4A1(SLCO4A1)
2962	general transcription factor IIF subunit 1(GTF2F1)
1839	heparin binding EGF like growth factor(HBEGF)
8436	serum deprivation response(SDPR)
8434	reversion inducing cysteine rich protein with kazal motifs(RECK)
29951	PDZ domain containing ring finger 4(PDZRN4)
10950	BTG anti-proliferation factor 3(BTG3)
57484	ring finger protein 150(RNF150)
5332	phospholipase C beta 4(PLCB4)
140597	transcription elongation factor A like 2(TCEAL2)
51278	immediate early response 5(IER5)
10758	TRAF3 interacting protein 2(TRAF3IP2)
55273	transmembrane protein 100(TMEM100)
5327	plasminogen activator, tissue type(PLAT)
57488	extended synaptotagmin 2(ESYT2)
10060	ATP binding cassette subfamily C member 9(ABCC9)
29953	thyrotropin releasing hormone degrading enzyme(TRHDE)
9590	A-kinase anchoring protein 12(AKAP12)
140862	isthmin 1(ISM1)
50863	neurotrimin(NTM)
143098	membrane palmitoylated protein 7(MPP7)
306	annexin A3(ANXA3)
100616282	microRNA 4738(MIR4738)
10965	acyl-CoA thioesterase 2(ACOT2)
4982	TNF receptor superfamily member 11b(TNFRSF11B)
135293	peptidase M20 domain containing 2(PM20D2)
3248	hydroxyprostaglandin dehydrogenase 15-(NAD)(HPGD)
9314	Kruppel like factor 4(KLF4)
2114	ETS proto-oncogene 2, transcription factor(ETS2)
5311	polycystin 2, transient receptor potential cation channel(PKD2)
5108	pericentriolar material 1(PCM1)
10974	adipogenesis regulatory factor(ADIRF)
147727	ILF3 antisense RNA 1 (head to head)(ILF3-AS1)
5105	phosphoenolpyruvate carboxykinase 1(PCK1)
10979	fermitin family member 2(FERMT2)
27145	filamin A interacting protein 1(FILIP1)
8076	microfibrillar associated protein 5(MFAP5)
1803	dipeptidyl peptidase 4(DPP4)
558	AXL receptor tyrosine kinase(AXL)
29931	long intergenic non-protein coding RNA 312(LINC00312)
8908	glycogenin 2(GYG2)
10040	target of myb1 like 1 membrane trafficking protein(TOM1L1)
8483	cartilage intermediate layer protein(CILP)
956	ectonucleoside triphosphate diphosphohydrolase 3(ENTPD3)
8082	sarcospan(SSPN)
27151	C3 and PZP like, alpha-2-macroglobulin domain containing 8(CPAMD8)
79875	thrombospondin type 1 domain containing 4(THSD4)
55244	solute carrier family 47 member 1(SLC47A1)
8910	sarcoglycan epsilon(SGCE)
7360	UDP-glucose pyrophosphorylase 2(UGP2)
5101	protocadherin 9(PCDH9)
8470	sorbin and SH3 domain containing 2(SORBS2)
9337	CCR4-NOT transcription complex subunit 8(CNOT8)
192668	cystin 1(CYS1)
4040	LDL receptor related protein 6(LRP6)
10797	methylenetetrahydrofolate dehydrogenase (NADP+ dependent) 2, methenyltetrahydrofolate cyclohydrolase(MTHFD2)
3005	H1 histone family member 0(H1F0)
4926	nuclear mitotic apparatus protein 1(NUMA1)
113246	chromosome 12 open reading frame 57(C12orf57)
4929	nuclear receptor subfamily 4 group A member 2(NR4A2)
3679	integrin subunit alpha 7(ITGA7)
55022	phosphotyrosine interaction domain containing 1(PID1)
11155	LIM domain binding 3(LDB3)
283131	nuclear paraspeckle assembly transcript 1 (non-protein coding)(NEAT1)
55026	transmembrane protein 255A(TMEM255A)
4921	discoidin domain receptor tyrosine kinase 2(DDR2)
56994	choline phosphotransferase 1(CHPT1)
9358	integrin subunit beta like 1(ITGBL1)
152503	SH3 domain containing 19(SH3D19)
56997	coenzyme Q8A(COQ8A)
3206	homeobox A10(HOXA10)
4291	myeloid leukemia factor 1(MLF1)
8490	regulator of G-protein signaling 5(RGS5)
9547	C-X-C motif chemokine ligand 14(CXCL14)
9352	thioredoxin like 1(TXNL1)
114818	kelch like family member 29(KLHL29)
79695	polypeptide N-acetylgalactosaminyltransferase 12(GALNT12)
9737	G protein-coupled receptor associated sorting protein 1(GPRASP1)
4299	AF4/FMR2 family member 1(AFF1)
55422	zinc finger protein 331(ZNF331)
139065	SLIT and NTRK like family member 4(SLITRK4)
80176	splA/ryanodine receptor domain and SOCS box containing 1(SPSB1)
3400	inhibitor of DNA binding 4, HLH protein(ID4)
11145	phospholipase A2 group XVI(PLA2G16)
81617	calcium binding protein 39 like(CAB39L)
286133	scavenger receptor class A member 5(SCARA5)
4023	lipoprotein lipase(LPL)
56981	PR/SET domain 11(PRDM11)
2167	fatty acid binding protein 4(FABP4)
116362	retinol binding protein 7(RBP7)
199870	family with sequence similarity 76 member A(FAM76A)
3899	AF4/FMR2 family member 3(AFF3)
644150	WAS/WASL interacting protein family member 3(WIPF3)
2770	G protein subunit alpha i1(GNAI1)
10278	embryonal Fyn-associated substrate(EFS)
3033	hydroxyacyl-CoA dehydrogenase(HADH)
29080	coiled-coil domain containing 59(CCDC59)
5803	protein tyrosine phosphatase, receptor type Z1(PTPRZ1)
10276	neuroepithelial cell transforming 1(NET1)
3030	hydroxyacyl-CoA dehydrogenase/3-ketoacyl-CoA thiolase/enoyl-CoA hydratase (trifunctional protein), alpha subunit(HADHA)
1647	growth arrest and DNA damage inducible alpha(GADD45A)
1649	DNA damage inducible transcript 3(DDIT3)
79026	AHNAK nucleoprotein(AHNAK)
1646	aldo-keto reductase family 1 member C2(AKR1C2)
11138	TBC1 domain family member 8(TBC1D8)
1645	aldo-keto reductase family 1 member C1(AKR1C1)
23428	solute carrier family 7 member 8(SLC7A8)
6004	regulator of G-protein signaling 16(RGS16)
53342	interleukin 17D(IL17D)
9370	adiponectin, C1Q and collagen domain containing(ADIPOQ)
10284	Sin3A associated protein 18(SAP18)
794	calbindin 2(CALB2)
56977	storkhead box 2(STOX2)
2774	G protein subunit alpha L(GNAL)
29091	syntaxin binding protein 6(STXBP6)
2180	acyl-CoA synthetase long-chain family member 1(ACSL1)
29094	galectin like(LGALSL)
4008	LIM domain 7(LMO7)
1634	decorin(DCN)
83543	allograft inflammatory factor 1 like(AIF1L)
79038	zinc finger FYVE-type containing 21(ZFYVE21)
11124	Fas associated factor 1(FAF1)
2184	fumarylacetoacetate hydrolase(FAH)
154807	vitamin K epoxide reductase complex subunit 1 like 1(VKORC1L1)
9510	ADAM metallopeptidase with thrombospondin type 1 motif 1(ADAMTS1)
56963	repulsive guidance molecule family member a(RGMA)
6263	ryanodine receptor 3(RYR3)
112609	melanocortin 2 receptor accessory protein 2(MRAP2)
2192	fibulin 1(FBLN1)
2194	fatty acid synthase(FASN)
2199	fibulin 2(FBLN2)
3632	inositol polyphosphate-5-phosphatase A(INPP5A)
8971	H1 histone family member X(H1FX)
3037	hyaluronan synthase 2(HAS2)
222389	BEN domain containing 7(BEND7)
3036	hyaluronan synthase 1(HAS1)
8976	Wiskott-Aldrich syndrome like(WASL)
2908	nuclear receptor subfamily 3 group C member 1(NR3C1)
1660	DExH-box helicase 9(DHX9)
2719	glypican 3(GPC3)
11185	indolethylamine N-methyltransferase(INMT)
9397	N-myristoyltransferase 2(NMT2)
6840	supervillin(SVIL)
283392	TRHDE antisense RNA 1(TRHDE-AS1)
23414	zinc finger protein, FOG family member 2(ZFPM2)
29070	coiled-coil domain containing 113(CCDC113)
9531	BCL2 associated athanogene 3(BAG3)
2934	gelsolin(GSN)
79667	KLF3 antisense RNA 1(KLF3-AS1)
1690	cochlin(COCH)
56943	ENY2, transcription and export complex 2 subunit(ENY2)
11170	family with sequence similarity 107 member A(FAM107A)
80762	Nedd4 family interacting protein 1(NDFIP1)
3075	complement factor H(CFH)
80760	inter-alpha-trypsin inhibitor heavy chain family member 5(ITIH5)
9520	aminopeptidase puromycin sensitive(NPEPPS)
59271	eva-1 homolog C(EVA1C)
1879	early B-cell factor 1(EBF1)
11163	nudix hydrolase 4(NUDT4)
3475	interferon related developmental regulator 1(IFRD1)
6236	RRAD, Ras related glycolysis inhibitor and calcium channel regulator(RRAD)
6038	ribonuclease A family member 4(RNASE4)
1675	complement factor D(CFD)
3667	insulin receptor substrate 1(IRS1)
4915	neurotrophic receptor tyrosine kinase 2(NTRK2)
2532	atypical chemokine receptor 1 (Duffy blood group)(ACKR1)
3725	Jun proto-oncogene, AP-1 transcription factor subunit(JUN)
5733	prostaglandin E receptor 3(PTGER3)
55742	parvin alpha(PARVA)
9863	membrane associated guanylate kinase, WW and PDZ domain containing 2(MAGI2)
83604	transmembrane protein 47(TMEM47)
3726	JunB proto-oncogene, AP-1 transcription factor subunit(JUNB)
4616	growth arrest and DNA damage inducible beta(GADD45B)
7060	thrombospondin 4(THBS4)
114898	C1q and tumor necrosis factor related protein 2(C1QTNF2)
80206	formin homology 2 domain containing 3(FHOD3)
7068	thyroid hormone receptor beta(THRB)
7067	thyroid hormone receptor, alpha(THRA)
5740	prostaglandin I2 synthase(PTGIS)
7069	thyroid hormone responsive(THRSP)
5743	prostaglandin-endoperoxide synthase 2(PTGS2)
4886	neuropeptide Y receptor Y1(NPY1R)
56920	semaphorin 3G(SEMA3G)
55553	SRY-box 6(SOX6)
7079	TIMP metallopeptidase inhibitor 4(TIMP4)
4223	mesenchyme homeobox 2(MEOX2)
201562	3-hydroxyacyl-CoA dehydratase 2(HACD2)
3912	laminin subunit beta 1(LAMB1)
7078	TIMP metallopeptidase inhibitor 3(TIMP3)
23127	collagen beta(1-O)galactosyltransferase 2(COLGALT2)
4499	metallothionein 1M(MT1M)
4609	v-myc avian myelocytomatosis viral oncogene homolog(MYC)
253738	early B-cell factor 3(EBF3)
388815	mir-99a-let-7c cluster host gene(MIR99AHG)
54884	retinol saturase(RETSAT)
404201	WDFY3 antisense RNA 2(WDFY3-AS2)
7042	transforming growth factor beta 2(TGFB2)
3949	low density lipoprotein receptor(LDLR)
81563	chromosome 1 open reading frame 21(C1orf21)
4638	myosin light chain kinase(MYLK)
114876	oxysterol binding protein like 1A(OSBPL1A)
7049	transforming growth factor beta receptor 3(TGFBR3)
7048	transforming growth factor beta receptor 2(TGFBR2)
49854	zinc finger and BTB domain containing 21(ZBTB21)
4232	mesoderm specific transcript(MEST)
55737	VPS35, retromer complex component(VPS35)
91653	BOC cell adhesion associated, oncogene regulated(BOC)
65062	transmembrane protein 237(TMEM237)
4239	microfibrillar associated protein 4(MFAP4)
65265	chromosome 8 open reading frame 33(C8orf33)
54873	palmdelphin(PALMD)
100507632	long intergenic non-protein coding RNA 968(LINC00968)
9899	synaptic vesicle glycoprotein 2B(SV2B)
130399	activin A receptor type 1C(ACVR1C)
222166	maturin, neural progenitor differentiation regulator homolog(MTURN)
81575	apolipoprotein L domain containing 1(APOLD1)
4629	myosin heavy chain 11(MYH11)
116039	odd-skipped related transciption factor 2(OSR2)
4628	myosin heavy chain 10(MYH10)
4857	NOVA alternative splicing regulator 1(NOVA1)
4856	nephroblastoma overexpressed(NOV)
4660	protein phosphatase 1 regulatory subunit 12B(PPP1R12B)
23171	glycerol-3-phosphate dehydrogenase 1-like(GPD1L)
10580	sorbin and SH3 domain containing 1(SORBS1)
23176	septin 8(SEPT8)
100128252	ZNF667 antisense RNA 1 (head to head)(ZNF667-AS1)
4071	transmembrane 4 L six family member 1(TM4SF1)
23177	centrosomal protein 68(CEP68)
10586	mab-21 like 2(MAB21L2)
23371	tensin 2(TNS2)
2674	GDNF family receptor alpha 1(GFRA1)
89797	neuron navigator 2(NAV2)
4653	myocilin(MYOC)
9068	angiopoietin like 1(ANGPTL1)
11231	SEC63 homolog, protein translocation regulator(SEC63)
4257	microsomal glutathione S-transferase 1(MGST1)
4259	microsomal glutathione S-transferase 3(MGST3)
5507	protein phosphatase 1 regulatory subunit 3C(PPP1R3C)
3953	leptin receptor(LEPR)
10370	Cbp/p300 interacting transactivator with Glu/Asp rich carboxy-terminal domain 2(CITED2)
2662	growth differentiation factor 10(GDF10)
5502	protein phosphatase 1 regulatory inhibitor subunit 1A(PPP1R1A)
3952	leptin(LEP)
4088	SMAD family member 3(SMAD3)
10579	transforming acidic coiled-coil containing protein 2(TACC2)
56603	cytochrome P450 family 26 subfamily B member 1(CYP26B1)
55766	H2A histone family member J(H2AFJ)
10365	Kruppel like factor 2(KLF2)
9723	semaphorin 3E(SEMA3E)
3991	lipase E, hormone sensitive type(LIPE)
51655	ras related dexamethasone induced 1(RASD1)
133383	SET domain containing 9(SETD9)
26577	procollagen C-endopeptidase enhancer 2(PCOLCE2)
3983	actin binding LIM protein 1(ABLIM1)
10560	solute carrier family 19 member 2(SLC19A2)
7088	transducin like enhancer of split 1(TLE1)
100505881	MAGI2 antisense RNA 3(MAGI2-AS3)
4675	nucleosome assembly protein 1 like 3(NAP1L3)
151887	coiled-coil domain containing 80(CCDC80)
4882	natriuretic peptide receptor 2(NPR2)
11211	frizzled class receptor 10(FZD10)
4673	nucleosome assembly protein 1 like 1(NAP1L1)
7957	epilepsy, progressive myoclonus type 2A, Lafora disease (laforin)(EPM2A)
7763	zinc finger AN1-type containing 5(ZFAND5)
10351	ATP binding cassette subfamily A member 8(ABCA8)
100509620	putative aquaporin-7-like protein 3(LOC100509620)
2690	growth hormone receptor(GHR)
9086	eukaryotic translation initiation factor 1A, Y-linked(EIF1AY)
5727	patched 1(PTCH1)
5523	protein phosphatase 2 regulatory subunit B''alpha(PPP2R3A)
3976	leukemia inhibitory factor(LIF)
57088	phospholipid scramblase 4(PLSCR4)
10555	1-acylglycerol-3-phosphate O-acyltransferase 2(AGPAT2)
3977	leukemia inhibitory factor receptor alpha(LIFR)
10350	ATP binding cassette subfamily A member 9(ABCA9)
7095	SEC62 homolog, preprotein translocation factor(SEC62)
50937	cell adhesion associated, oncogene regulated(CDON)
7536	splicing factor 1(SF1)
5950	retinol binding protein 4(RBP4)
8531	Y-box binding protein 3(YBX3)
5166	pyruvate dehydrogenase kinase 4(PDK4)
7538	ZFP36 ring finger protein(ZFP36)
5167	ectonucleotide pyrophosphatase/phosphodiesterase 1(ENPP1)
84935	mesenteric estrogen dependent adipogenesis(MEDAG)
55186	solute carrier family 25 member 36(SLC25A36)
6423	secreted frizzled related protein 2(SFRP2)
6422	secreted frizzled related protein 1(SFRP1)
6421	splicing factor proline and glutamine rich(SFPQ)
51421	angiomotin like 2(AMOTL2)
122953	Jun dimerization protein 2(JDP2)
30819	potassium voltage-gated channel interacting protein 2(KCNIP2)
284018	chromosome 17 open reading frame 58(C17orf58)
57569	Rho GTPase activating protein 20(ARHGAP20)
5178	paternally expressed 3(PEG3)
10140	transducer of ERBB2, 1(TOB1)
5179	proenkephalin(PENK)
728819	C1GALT1-specific chaperone 1 like(C1GALT1C1L)
8544	pirin(PIR)
51018	ribosomal RNA processing 15 homolog(RRP15)
401093	MBNL1 antisense RNA 1(MBNL1-AS1)
10914	poly(A) polymerase alpha(PAPOLA)
91461	protein kinase domain containing, cytoplasmic(PKDCC)
26353	heat shock protein family B (small) member 8(HSPB8)
57562	centrosomal protein 126(CEP126)
10149	adhesion G protein-coupled receptor G2(ADGRG2)
51433	anaphase promoting complex subunit 5(ANAPC5)
51435	scavenger receptor class A member 3(SCARA3)
619279	zinc finger protein 704(ZNF704)
64321	SRY-box 17(SOX17)
5142	phosphodiesterase 4B(PDE4B)
23580	CDC42 effector protein 4(CDC42EP4)
5140	phosphodiesterase 3B(PDE3B)
8553	basic helix-loop-helix family member e40(BHLHE40)
22998	LIM and calponin homology domains 1(LIMCH1)
5144	phosphodiesterase 4D(PDE4D)
342035	gliomedin(GLDN)
134466	zinc finger protein 300 pseudogene 1(ZNF300P1)
84417	chromosome 2 open reading frame 40(C2orf40)
5563	protein kinase AMP-activated catalytic subunit alpha 2(PRKAA2)
5137	phosphodiesterase 1C(PDE1C)
25802	leiomodin 1(LMOD1)
10516	fibulin 5(FBLN5)
285313	immunoglobulin superfamily member 10(IGSF10)
23593	heme binding protein 2(HEBP2)
596	BCL2, apoptosis regulator(BCL2)
390	Rho family GTPase 3(RND3)
395	Rho GTPase activating protein 6(ARHGAP6)
91851	chordin like 1(CHRDL1)
23189	KN motif and ankyrin repeat domains 1(KANK1)
27303	RNA binding motif single stranded interacting protein 3(RBMS3)
27306	hematopoietic prostaglandin D synthase(HPGDS)
729970	hCG2028352-like(LOC729970)
26137	zinc finger and BTB domain containing 20(ZBTB20)
5781	protein tyrosine phosphatase, non-receptor type 11(PTPN11)
7704	zinc finger and BTB domain containing 16(ZBTB16)
100129583	family with sequence similarity 47 member E(FAM47E)
5577	protein kinase cAMP-dependent type II regulatory subunit beta(PRKAR2B)
5990	regulatory factor X2(RFX2)
388	ras homolog family member B(RHOB)
1153	cold inducible RNA binding protein(CIRBP)
7018	transferrin(TF)
1346	cytochrome c oxidase subunit 7A1(COX7A1)
1152	creatine kinase B(CKB)
6662	SRY-box 9(SOX9)
5793	protein tyrosine phosphatase, receptor type G(PTPRG)
7035	tissue factor pathway inhibitor(TFPI)
7039	transforming growth factor alpha(TGFA)
5792	protein tyrosine phosphatase, receptor type F(PTPRF)
5980	REV3 like, DNA directed polymerase zeta catalytic subunit(REV3L)
54463	family with sequence similarity 134 member B(FAM134B)
5787	protein tyrosine phosphatase, receptor type B(PTPRB)
5592	protein kinase, cGMP-dependent, type I(PRKG1)
219348	placenta specific 9(PLAC9)
51069	mitochondrial ribosomal protein L2(MRPL2)
55568	polypeptide N-acetylgalactosaminyltransferase 10(GALNT10)
101926960	uncharacterized LOC101926960(LOC101926960)
3908	laminin subunit alpha 2(LAMA2)
51449	prenylcysteine oxidase 1(PCYOX1)
90865	interleukin 33(IL33)
368	ATP binding cassette subfamily C member 6(ABCC6)
367	androgen receptor(AR)
25849	prostate androgen-regulated mucin-like protein 1(PARM1)
57016	aldo-keto reductase family 1 member B10(AKR1B10)
57018	cyclin L1(CCNL1)
84263	hydroxysteroid dehydrogenase like 2(HSDL2)
26778	small nucleolar RNA, H/ACA box 70(SNORA70)
6432	serine and arginine rich splicing factor 7(SRSF7)
6434	transformer 2 beta homolog (Drosophila)(TRA2B)
57509	microtubule associated tumor suppressor 1(MTUS1)
1363	carboxypeptidase E(CPE)
57717	protocadherin beta 16(PCDHB16)
493812	HLA complex group 11 (non-protein coding)(HCG11)
51076	cutC copper transporter(CUTC)
351	amyloid beta precursor protein(APP)
25854	family with sequence similarity 149 member A(FAM149A)
100506548	uncharacterized LOC100506548(LOC100506548)
1356	ceruloplasmin(CP)
51454	GULP, engulfment adaptor PTB domain containing 1(GULP1)
6424	secreted frizzled related protein 4(SFRP4)
1163	CDC28 protein kinase regulatory subunit 1B(CKS1B)
57007	atypical chemokine receptor 3(ACKR3)
7008	TEF, PAR bZIP transcription factor(TEF)
10894	lymphatic vessel endothelial hyaluronan receptor 1(LYVE1)
2009	echinoderm microtubule associated protein like 1(EML1)
7499	Xg blood group(XG)
800	caldesmon 1(CALD1)
11099	protein tyrosine phosphatase, non-receptor type 21(PTPN21)
51375	sorting nexin 7(SNX7)
150	adrenoceptor alpha 2A(ADRA2A)
1728	NAD(P)H quinone dehydrogenase 1(NQO1)
8322	frizzled class receptor 4(FZD4)
2012	epithelial membrane protein 1(EMP1)
94274	protein phosphatase 1 regulatory inhibitor subunit 14A(PPP1R14A)
2205	Fc fragment of IgE receptor Ia(FCER1A)
22800	related RAS viral (r-ras) oncogene homolog 2(RRAS2)
22801	integrin subunit alpha 11(ITGA11)
604	B-cell CLL/lymphoma 6(BCL6)
2200	fibrillin 1(FBN1)
2018	empty spiracles homeobox 2(EMX2)
6781	stanniocalcin 1(STC1)
23500	dishevelled associated activator of morphogenesis 2(DAAM2)
1326	mitogen-activated protein kinase kinase kinase 8(MAP3K8)
79710	MORC family CW-type zinc finger 4(MORC4)
1718	24-dehydrocholesterol reductase(DHCR24)
10628	thioredoxin interacting protein(TXNIP)
59353	transmembrane protein 35A(TMEM35A)
101930114	uncharacterized LOC101930114(LOC101930114)
55366	leucine rich repeat containing G protein-coupled receptor 4(LGR4)
100033416	small nucleolar RNA, C/D box 116-4(SNORD116-4)
8864	period circadian clock 2(PER2)
23531	monocyte to macrophage differentiation associated(MMD)
10875	fibrinogen like 2(FGL2)
80856	lunapark, ER junction formation factor(LNPK)
90523	muscular LMNA interacting protein(MLIP)
6376	C-X3-C motif chemokine ligand 1(CX3CL1)
624	bradykinin receptor B2(BDKRB2)
8853	ArfGAP with SH3 domain, ankyrin repeat and PH domain 2(ASAP2)
23524	serine/arginine repetitive matrix 2(SRRM2)
59338	pleckstrin homology domain containing A1(PLEKHA1)
64499	tryptase beta 2 (gene/pseudogene)(TPSB2)
55384	maternally expressed 3 (non-protein coding)(MEG3)
2825	G protein-coupled receptor 1(GPR1)
100534589	HOXA10-HOXA9 readthrough(HOXA10-HOXA9)
182	jagged 1(JAG1)
185	angiotensin II receptor type 1(AGTR1)
6385	syndecan 4(SDC4)
5236	phosphoglucomutase 1(PGM1)
8848	TSC22 domain family member 1(TSC22D1)
5239	phosphoglucomutase 5(PGM5)
6595	SWI/SNF related, matrix associated, actin dependent regulator of chromatin, subfamily a, member 2(SMARCA2)
55137	fidgetin, microtubule severing factor(FIGN)
84171	lysyl oxidase like 4(LOXL4)
200734	sprouty related EVH1 domain containing 2(SPRED2)
847	catalase(CAT)
6590	secretory leukocyte peptidase inhibitor(SLPI)
8639	amine oxidase, copper containing 3(AOC3)
8843	hydroxycarboxylic acid receptor 3(HCAR3)
28971	adipogenesis associated Mth938 domain containing(AAMDC)
8835	suppressor of cytokine signaling 2(SOCS2)
2247	fibroblast growth factor 2(FGF2)
8644	aldo-keto reductase family 1 member C3(AKR1C3)
55335	nipsnap homolog 3B(NIPSNAP3B)
10656	KH RNA binding domain containing, signal transduction associated 3(KHDRBS3)
125	alcohol dehydrogenase 1B (class I), beta polypeptide(ADH1B)
126	alcohol dehydrogenase 1C (class I), gamma polypeptide(ADH1C)
60485	salvador family WW domain containing protein 1(SAV1)
128	alcohol dehydrogenase 5 (class III), chi polypeptide(ADH5)
123	perilipin 2(PLIN2)
124	alcohol dehydrogenase 1A (class I), alpha polypeptide(ADH1A)
3397	inhibitor of DNA binding 1, HLH protein(ID1)
2260	fibroblast growth factor receptor 1(FGFR1)
444	aspartate beta-hydroxylase(ASPH)
84952	cingulin like 1(CGNL1)
28984	regulator of cell cycle(RGCC)
445	argininosuccinate synthase 1(ASS1)
7436	very low density lipoprotein receptor(VLDLR)
9481	solute carrier family 25 member 27(SLC25A27)
117583	par-3 family cell polarity regulator beta(PARD3B)
23743	betaine--homocysteine S-methyltransferase 2(BHMT2)
443	aspartoacylase(ASPA)
2258	fibroblast growth factor 13(FGF13)
55323	La ribonucleoprotein domain family member 6(LARP6)
6192	ribosomal protein S4, Y-linked 1(RPS4Y1)
93380	membrane magnesium transporter 1(MMGT1)
26040	SET binding protein 1(SETBP1)
51123	zinc finger protein 706(ZNF706)
26018	leucine rich repeats and immunoglobulin like domains 1(LRIG1)
133	adrenomedullin(ADM)
256691	MAM domain containing 2(MAMDC2)
100506365	OTUD6B antisense RNA 1 (head to head)(OTUD6B-AS1)
257194	neuronal growth regulator 1(NEGR1)
868	Cbl proto-oncogene B(CBLB)
29105	cilia and flagella associated protein 20(CFAP20)
5212	vitrin(VIT)
8613	phospholipid phosphatase 3(PLPP3)
5010	claudin 11(CLDN11)
2872	MAP kinase interacting serine/threonine kinase 2(MKNK2)
5205	ATPase phospholipid transporting 8B1(ATP8B1)
8817	fibroblast growth factor 18(FGF18)
5209	6-phosphofructo-2-kinase/fructose-2,6-biphosphatase 3(PFKFB3)
84159	AT-rich interaction domain 5B(ARID5B)
2878	glutathione peroxidase 3(GPX3)
26010	spermatogenesis associated serine rich 2 like(SPATS2L)
26960	neurobeachin(NBEA)
858	caveolin 2(CAV2)
5901	RAN, member RAS oncogene family(RAN)
8611	phospholipid phosphatase 1(PLPP1)
463	zinc finger homeobox 3(ZFHX3)
23764	MAF bZIP transcription factor F(MAFF)
400027	long intergenic non-protein coding RNA 938(LINC00938)
467	activating transcription factor 3(ATF3)
8803	succinate-CoA ligase ADP-forming beta subunit(SUCLA2)
2239	glypican 4(GPC4)
9467	SH3 domain binding protein 5(SH3BP5)
84168	anthrax toxin receptor 1(ANTXR1)
2869	G protein-coupled receptor kinase 5(GRK5)
26025	protocadherin gamma subfamily A, 12(PCDHGA12)
114926	small integral membrane protein 19(SMIM19)
687	Kruppel like factor 9(KLF9)
9452	integral membrane protein 2A(ITM2A)
2644	GTP cyclohydrolase I feedback regulator(GCHFR)
688	Kruppel like factor 5(KLF5)
9457	four and a half LIM domains 5(FHL5)
3148	high mobility group box 2(HMGB2)
685	betacellulin(BTC)
3339	heparan sulfate proteoglycan 2(HSPG2)
9244	cytokine receptor like factor 1(CRLF1)
3337	DnaJ heat shock protein family (Hsp40) member B1(DNAJB1)
6168	ribosomal protein L37a(RPL37A)
2289	FK506 binding protein 5(FKBP5)
83876	maestro(MRO)
23710	GABA type A receptor associated protein like 1(GABARAPL1)
80243	phosphatidylinositol-3,4,5-trisphosphate dependent Rac exchange factor 2(PREX2)
9249	dehydrogenase/reductase 3(DHRS3)
2296	forkhead box C1(FOXC1)
79148	matrix metallopeptidase 28(MMP28)
79993	ELOVL fatty acid elongase 7(ELOVL7)
100507472	uncharacterized LOC100507472(LOC100507472)
23301	EH domain binding protein 1(EHBP1)
79785	RERG like(RERGL)
4828	neuromedin B(NMB)
1528	cytochrome b5 type A(CYB5A)
678	ZFP36 ring finger protein like 2(ZFP36L2)
9638	fasciculation and elongation protein zeta 1(FEZ1)
114915	EPB41L4A antisense RNA 1(EPB41L4A-AS1)
2653	glycine cleavage system protein H(GCSH)
9255	aminoacyl tRNA synthetase complex interacting multifunctional protein 1(AIMP1)
283481	FGF14 antisense RNA 2(FGF14-AS2)
83660	talin 2(TLN2)
9052	G protein-coupled receptor class C group 5 member A(GPRC5A)
3995	fatty acid desaturase 3(FADS3)
65084	transmembrane protein 135(TMEM135)
9627	synuclein alpha interacting protein(SNCAIP)
11030	RNA binding protein with multiple splicing(RBPMS)
3316	heat shock protein family B (small) member 2(HSPB2)
11034	destrin, actin depolymerizing factor(DSTN)
79974	cadherin like and PC-esterase domain containing 1(CPED1)
2273	four and a half LIM domains 1(FHL1)
3321	immunoglobulin superfamily member 3(IGSF3)
23328	SAM and SH3 domain containing 1(SASH1)
10178	teneurin transmembrane protein 1(TENM1)
79762	chromosome 1 open reading frame 115(C1orf115)
83690	cysteine rich secretory protein LCCL domain containing 1(CRISPLD1)
3131	HLF, PAR bZIP transcription factor(HLF)
23321	tripartite motif containing 2(TRIM2)
2632	1,4-alpha-glucan branching enzyme 1(GBE1)
83888	fibroblast growth factor binding protein 2(FGFBP2)
54749	ependymin related 1(EPDR1)
100302263	microRNA 1908(MIR1908)
1776	deoxyribonuclease 1 like 3(DNASE1L3)
79960	jade family PHD finger 1(JADE1)
4811	nidogen 1(NID1)
10186	lipoma HMGIC fusion partner(LHFP)
23336	synemin(SYNM)
79776	zinc finger homeobox 4(ZFHX4)
11259	filamin A interacting protein 1 like(FILIP1L)
29899	G-protein signaling modulator 2(GPSM2)
2052	epoxide hydrolase 1(EPHX1)
10398	myosin light chain 9(MYL9)
10395	DLC1 Rho GTPase activating protein(DLC1)
113146	AHNAK nucleoprotein 2(AHNAK2)
119385	ArfGAP with GTPase domain, ankyrin repeat and PH domain 11(AGAP11)
8165	A-kinase anchoring protein 1(AKAP1)
3777	potassium two pore domain channel subfamily K member 3(KCNK3)
10391	coronin 2B(CORO2B)
6920	transcription elongation factor A3(TCEA3)
56255	thioredoxin related transmembrane protein 4(TMX4)
56256	SERTA domain containing 4(SERTAD4)
6926	T-box 3(TBX3)
9975	nuclear receptor subfamily 1 group D member 2(NR1D2)
2619	growth arrest specific 1(GAS1)
2066	erb-b2 receptor tyrosine kinase 4(ERBB4)
1756	dystrophin(DMD)
9956	heparan sulfate-glucosamine 3-sulfotransferase 2(HS3ST2)
2065	erb-b2 receptor tyrosine kinase 3(ERBB3)
3306	heat shock protein family A (Hsp70) member 2(HSPA2)
644246	KANSL1 antisense RNA 1(KANSL1-AS1)
347902	adhesion molecule with Ig like domain 2(AMIGO2)
3303	heat shock protein family A (Hsp70) member 1A(HSPA1A)
79191	iroquois homeobox 3(IRX3)
9686	vestigial like family member 4(VGLL4)
93986	forkhead box P2(FOXP2)
9689	basic leucine zipper and W2 domains 1(BZW1)
100652988	long intergenic non-protein coding RNA 702(LINC00702)
53844	COPG2 imprinted transcript 1 (non-protein coding)(COPG2IT1)
6935	zinc finger E-box binding homeobox 1(ZEB1)
6934	transcription factor 7 like 2(TCF7L2)
102465532	microRNA 6883(MIR6883)
11076	tubulin polymerization promoting protein(TPPP)
2034	endothelial PAS domain protein 1(EPAS1)
664	BCL2 interacting protein 3(BNIP3)
56849	transcription elongation factor A like 7(TCEAL7)
114905	C1q and tumor necrosis factor related protein 7(C1QTNF7)
666	BOK, BCL2 family apoptosis regulator(BOK)
100996506	uncharacterized LOC100996506(LOC100996506)
3178	heterogeneous nuclear ribonucleoprotein A1(HNRNPA1)
9671	WSC domain containing 2(WSCD2)
653082	zinc finger DHHC-type containing 11B(ZDHHC11B)
1730	diaphanous related formin 2(DIAPH2)
6717	sorcin(SRI)
657	bone morphogenetic protein receptor type 1A(BMPR1A)
2045	EPH receptor A7(EPHA7)
9934	purinergic receptor P2Y14(P2RY14)
6711	spectrin beta, non-erythrocytic 1(SPTBN1)
652	bone morphogenetic protein 4(BMP4)
9270	integrin subunit beta 1 binding protein 1(ITGB1BP1)
653	bone morphogenetic protein 5(BMP5)
6913	T-box 15(TBX15)
11067	chromosome 10 open reading frame 10(C10orf10)
83643	coiled-coil domain containing 3(CCDC3)
10207	PATJ, crumbs cell polarity complex component(PATJ)
153579	butyrophilin like 9(BTNL9)
286097	mitochondrial calcium uptake family member 3(MICU3)
90293	kelch like family member 13(KLHL13)
10209	eukaryotic translation initiation factor 1(EIF1)
33	acyl-CoA dehydrogenase, long chain(ACADL)
79901	cytochrome b reductase 1(CYBRD1)
126393	heat shock protein family B (small) member 6(HSPB6)
38	acetyl-CoA acetyltransferase 1(ACAT1)
7168	tropomyosin 1 (alpha)(TPM1)
1973	eukaryotic translation initiation factor 4A1(EIF4A1)
51776	sterile alpha motif and leucine zipper containing kinase AZK(ZAK)
7164	tumor protein D52-like 1(TPD52L1)
171024	synaptopodin 2(SYNPO2)
5649	reelin(RELN)
2327	flavin containing monooxygenase 2(FMO2)
54996	mitochondrial amidoxime reducing component 2(MARC2)
1983	eukaryotic translation initiation factor 5(EIF5)
28513	cadherin 19(CDH19)
1981	eukaryotic translation initiation factor 4 gamma 1(EIF4G1)
4121	mannosidase alpha class 1A member 1(MAN1A1)
7881	potassium voltage-gated channel subfamily A member regulatory beta subunit 1(KCNAB1)
32	acetyl-CoA carboxylase beta(ACACB)
7177	tryptase alpha/beta 1(TPSAB1)
1490	connective tissue growth factor(CTGF)
283927	nudix hydrolase 7(NUDT7)
4792	NFKB inhibitor alpha(NFKBIA)
2318	filamin C(FLNC)
4774	nuclear factor I A(NFIA)
10221	tribbles pseudokinase 1(TRIB1)
3841	karyopherin subunit alpha 5(KPNA5)
1073	cofilin 2(CFL2)
12	serpin family A member 3(SERPINA3)
53405	chloride intracellular channel 5(CLIC5)
25909	AT-hook containing transcription factor 1(AHCTF1)
23013	spen family transcriptional repressor(SPEN)
4783	nuclear factor, interleukin 3 regulated(NFIL3)
4781	nuclear factor I B(NFIB)
11343	monoglyceride lipase(MGLL)
206338	laeverin(LVRN)
221091	LRRN4 C-terminal like(LRRN4CL)
1466	cysteine and glycine rich protein 2(CSRP2)
2308	forkhead box O1(FOXO1)
10217	CTD small phosphatase like(CTDSPL)
2309	forkhead box O3(FOXO3)
64084	calsyntenin 2(CLSTN2)
1066	carboxylesterase 1(CES1)
10491	cartilage associated protein(CRTAP)
151050	KAT8 regulatory NSL complex subunit 1 like(KANSL1L)
10492	synaptotagmin binding cytoplasmic RNA interacting protein(SYNCRIP)
53616	ADAM metallopeptidase domain 22(ADAM22)
221294	5'-nucleotidase domain containing 1(NT5DC1)
23284	adhesion G protein-coupled receptor L3(ADGRL3)
152831	klotho beta(KLB)
79442	leucine rich repeat containing 2(LRRC2)
260293	cytochrome P450 family 4 subfamily X member 1(CYP4X1)
80303	EF-hand domain family member D1(EFHD1)
9188	DExD-box helicase 21(DDX21)
4772	nuclear factor of activated T-cells 1(NFATC1)
23239	PH domain and leucine rich repeat protein phosphatase 1(PHLPP1)
23236	phospholipase C beta 1(PLCB1)
4147	matrilin 2(MATN2)
23235	salt inducible kinase 2(SIK2)
572558	PGM5 antisense RNA 1(PGM5-AS1)
80310	platelet derived growth factor D(PDGFD)
83940	TatD DNase domain containing 1(TATDN1)
23037	PDZ domain containing 2(PDZD2)
23034	sterile alpha motif domain containing 4A(SAMD4A)
439921	matrix remodeling associated 7(MXRA7)
4155	myelin basic protein(MBP)
100526832	PHOSPHO2-KLHL23 readthrough(PHOSPHO2-KLHL23)
10231	regulator of calcineurin 2(RCAN2)
100532742	PIR-FIGF readthrough(PIR-FIGF)
23022	palladin, cytoskeletal associated protein(PALLD)
7832	BTG anti-proliferation factor 2(BTG2)
55893	zinc finger protein 395(ZNF395)
134147	carboxymethylenebutenolidase homolog(CMBL)
64061	TSPY like 2(TSPYL2)
80318	G kinase anchoring protein 1(GKAP1)
54756	interleukin 17 receptor D(IL17RD)
152559	progestin and adipoQ receptor family member 3(PAQR3)
10439	olfactomedin 1(OLFM1)
64065	PERP, TP53 apoptosis effector(PERP)
103091866	uncharacterized LOC103091866(LOC103091866)
2564	gamma-aminobutyric acid type A receptor epsilon subunit(GABRE)
72	actin, gamma 2, smooth muscle, enteric(ACTG2)
23051	zinc fingers and homeoboxes 3(ZHX3)
2561	gamma-aminobutyric acid type A receptor beta2 subunit(GABRB2)
4330	MN1 proto-oncogene, transcriptional regulator(MN1)
59	actin, alpha 2, smooth muscle, aorta(ACTA2)
10266	receptor activity modifying protein 2(RAMP2)
4128	monoamine oxidase A(MAOA)
65983	GRAM domain containing 3(GRAMD3)
2355	FOS like 2, AP-1 transcription factor subunit(FOSL2)
2354	FosB proto-oncogene, AP-1 transcription factor subunit(FOSB)
152137	coiled-coil domain containing 50(CCDC50)
65986	zinc finger and BTB domain containing 10(ZBTB10)
92689	family with sequence similarity 114 member A1(FAM114A1)
56129	protocadherin beta 7(PCDHB7)
161176	spectrin repeat containing nuclear envelope family member 3(SYNE3)
7871	sarcolemma associated protein(SLMAP)
4329	aldehyde dehydrogenase 6 family member A1(ALDH6A1)
4134	microtubule associated protein 4(MAP4)
10468	follistatin(FST)
22891	zinc finger protein 365(ZNF365)
4133	microtubule associated protein 2(MAP2)
4131	microtubule associated protein 1B(MAP1B)
253827	methionine sulfoxide reductase B3(MSRB3)
221037	jumonji domain containing 1C(JMJD1C)
10253	sprouty RTK signaling antagonist 2(SPRY2)
4137	microtubule associated protein tau(MAPT)
10252	sprouty RTK signaling antagonist 1(SPRY1)
4139	microtubule affinity regulating kinase 1(MARK1)
4724	NADH:ubiquinone oxidoreductase subunit S4(NDUFS4)
116535	MAS related GPR family member F(MRGPRF)
100302239	microRNA 548f-5(MIR548F5)
56112	protocadherin gamma subfamily A, 3(PCDHGA3)
93649	myocardin(MYOCD)
10455	enoyl-CoA delta isomerase 2(ECI2)
4144	methionine adenosyltransferase 2A(MAT2A)
57188	ADAMTS like 3(ADAMTSL3)
55638	syntabulin(SYBU)
22875	ectonucleotide pyrophosphatase/phosphodiesterase 4 (putative)(ENPP4)
26084	Rho guanine nucleotide exchange factor 26(ARHGEF26)
4306	nuclear receptor subfamily 3 group C member 2(NR3C2)
23461	ATP binding cassette subfamily A member 5(ABCA5)
57678	glycerol-3-phosphate acyltransferase, mitochondrial(GPAM)
8671	solute carrier family 4 member 4(SLC4A4)
283	angiogenin(ANG)
54511	3-hydroxymethyl-3-methylglutaryl-CoA lyase like 1(HMGCLL1)
5019	3-oxoacid CoA-transferase 1(OXCT1)
288	ankyrin 3(ANK3)
284119	polymerase I and transcript release factor(PTRF)
287	ankyrin 2(ANK2)
147495	APC down-regulated 1(APCDD1)
1287	collagen type IV alpha 5 chain(COL4A5)
10826	fatty acid hydroxylase domain containing 2(FAXDC2)
57162	pellino E3 ubiquitin protein ligase 1(PELI1)
57161	pellino E3 ubiquitin protein ligase family member 2(PELI2)
84133	zinc and ring finger 3(ZNRF3)
22881	ankyrin repeat domain 6(ANKRD6)
1902	lysophosphatidic acid receptor 1(LPAR1)
146894	CD300 molecule like family member g(CD300LG)
100288695	LIM zinc finger domain containing 4(LIMS4)
25976	TCDD inducible poly(ADP-ribose) polymerase(TIPARP)
57669	erythrocyte membrane protein band 4.1 like 5(EPB41L5)
477	ATPase Na+/K+ transporting subunit alpha 2(ATP1A2)
5830	peroxisomal biogenesis factor 5(PEX5)
276	amylase, alpha 1A (salivary)(AMY1A)
92293	transmembrane protein 132C(TMEM132C)
23066	cullin associated and neddylation dissociated 2 (putative)(CAND2)
10810	WAS protein family member 3(WASF3)
1910	endothelin receptor type B(EDNRB)
157567	ankyrin repeat domain 46(ANKRD46)
10424	progesterone receptor membrane component 2(PGRMC2)
1272	contactin 1(CNTN1)
117245	HRAS like suppressor family member 5(HRASLS5)
51715	RAB23, member RAS oncogene family(RAB23)
7102	tetraspanin 7(TSPAN7)
81035	collectin subfamily member 12(COLEC12)
54532	ubiquitin specific peptidase 53(USP53)
25987	tsukushi, small leucine rich proteoglycan(TSKU)
8653	DEAD-box helicase 3, Y-linked(DDX3Y)
5824	peroxisomal biogenesis factor 19(PEX19)
7422	vascular endothelial growth factor A(VEGFA)
108	adenylate cyclase 2(ADCY2)
51705	endomucin(EMCN)
5829	paxillin(PXN)
1266	calponin 3(CNN3)
6586	slit guidance ligand 3(SLIT3)
7111	tropomodulin 1(TMOD1)
401317	uncharacterized LOC401317(LOC401317)
1264	calponin 1(CNN1)
116987	ArfGAP with GTPase domain, ankyrin repeat and PH domain 1(AGAP1)
26054	SUMO1/sentrin specific peptidase 6(SENP6)
51704	G protein-coupled receptor class C group 5 member B(GPRC5B)
51309	armadillo repeat containing, X-linked 1(ARMCX1)
57689	leucine rich repeat containing 4C(LRRC4C)
8660	insulin receptor substrate 2(IRS2)
54541	DNA damage inducible transcript 4(DDIT4)
57685	cache domain containing 1(CACHD1)
23493	hes related family bHLH transcription factor with YRPW motif 2(HEY2)
51312	solute carrier family 25 member 37(SLC25A37)
57683	zinc finger DBF-type containing 2(ZDBF2)
25992	sushi, nidogen and EGF like domains 1(SNED1)
58526	MID1 interacting protein 1(MID1IP1)
26471	nuclear protein 1, transcriptional regulator(NUPR1)
6576	solute carrier family 25 member 1(SLC25A1)
22837	cordon-bleu WH2 repeat protein like 1(COBLL1)
22836	Rho related BTB domain containing 3(RHOBTB3)
5069	pappalysin 1(PAPPA)
5067	contactin 3(CNTN3)
57820	cyclin B1 interacting protein 1(CCNB1IP1)
6319	stearoyl-CoA desaturase(SCD)
55088	coiled-coil domain containing 186(CCDC186)
1052	CCAAT/enhancer binding protein delta(CEBPD)
5887	RAD23 homolog B, nucleotide excision repair protein(RAD23B)
5264	phytanoyl-CoA 2-hydroxylase(PHYH)
50486	G0/G1 switch 2(G0S2)
164832	LON peptidase N-terminal domain and ring finger 2(LONRF2)
5074	pro-apoptotic WT1 regulator(PAWR)
54566	erythrocyte membrane protein band 4.1 like 4B(EPB41L4B)
6509	solute carrier family 1 member 4(SLC1A4)
1948	ephrin B2(EFNB2)
6505	solute carrier family 1 member 1(SLC1A1)
729359	perilipin 4(PLIN4)
64641	early B-cell factor 2(EBF2)
1036	cysteine dioxygenase type 1(CDO1)
5493	periplakin(PPL)
5494	protein phosphatase, Mg2+/Mn2+ dependent 1A(PPM1A)
5274	serpin family I member 1(SERPINI1)
5277	phosphatidylinositol glycan anchor biosynthesis class A(PIGA)
25945	nectin cell adhesion molecule 3(NECTIN3)
5087	PBX homeobox 1(PBX1)
1956	epidermal growth factor receptor(EGFR)
7145	tensin 1(TNS1)
7146	tenascin XA (pseudogene)(TNXA)
151011	septin 10(SEPT10)
169044	collagen type XXII alpha 1 chain(COL22A1)
257019	FERM domain containing 3(FRMD3)
57459	GATA zinc finger domain containing 2B(GATAD2B)
729582	disrupted in renal carcinoma 3(DIRC3)
100288911	uncharacterized LOC100288911(LOC100288911)
6330	sodium voltage-gated channel beta subunit 4(SCN4B)
1964	eukaryotic translation initiation factor 1A, X-linked(EIF1AX)
6332	sodium voltage-gated channel alpha subunit 7(SCN7A)
5468	peroxisome proliferator activated receptor gamma(PPARG)
151742	protein phosphatase, Mg2+/Mn2+ dependent 1L(PPM1L)
25959	KN motif and ankyrin repeat domains 2(KANK2)
1960	early growth response 3(EGR3)
5292	Pim-1 proto-oncogene, serine/threonine kinase(PIM1)
57447	NDRG family member 2(NDRG2)
50808	adenylate kinase 3(AK3)
