# Supplementary material for: Effects of rheumatoid arthritis associated transcriptional changes on osteoclast differentiation network in the synovium
Source: PeerJ. 2018 Oct 11;6:e5743. doi: 10.7717/peerj.5743 (PMC6186409; doi:10.7717/peerj.5743)
Supplement: Supplemental Information 5 — The KEGG pathway term name along with the KEGG pathway identifier is listed in column B. The “Count” in column C denotes the number of upregulated genes which belong to the KEGG pathway term. The Entrez ID of these upregulated genes are provided in column D. The parameter in column E represents the percentage of upregulated genes that are part of the KEGG pathway term. “List Total” denotes the total number of upregulated genes which are part of the KEGG pathway database. “Population Total” represents the total number of genes that belong to the KEGG Pathway database. “Population Hits” signifies the number of the “Population Total” genes which are part of the KEGG pathway term. The “Fold.Enrichment” column is the proportion of “Count”/“List Total” to “Population Hits”/“Population Total.” The “PValue” is the EASE score which represents the significance of obtaining “count” genes in the “List Total” for the given KEGG pathway term which has “Population Hits” genes in the background “Population Total.” The columns termed as “Bonferroni,” “Benjamini” and “FDR” represent the adjusted Pvalue to control the effect of multiple testing. [file peerj-06-5743-s005.xlsx]

## Sheet: Sheet1
Category	Term	Count	Genes	X.	List.Total	Pop.Total	Pop.Hits	Fold.Enrichment	PValue	Bonferroni	Benjamini	FDR
KEGG_PATHWAY	hsa05150:Staphylococcus aureus infection	28	3126, 2359, 3111, 3112, 2357, 3683, 3684, 728, 9103, 3109, 3108, 629, 3113, 3115, 3117, 3119, 717, 716, 6404, 713, 712, 3689, 715, 2215, 2212, 2214, 2213, 3122	2.75049	471	6208	49	7.5317	2.60296e-18	6.84577e-16	6.84577e-16	3.40844e-15
KEGG_PATHWAY	hsa04145:Phagosome	46	3126, 3111, 3112, 11151, 10952, 6891, 23480, 6890, 64581, 3684, 9902, 9103, 1520, 3107, 3106, 3109, 537, 3920, 3108, 3134, 3105, 4074, 3113, 3115, 3117, 4689, 3135, 10312, 4688, 3119, 4481, 8685, 1514, 929, 653361, 3689, 715, 2215, 7058, 7097, 2212, 1535, 1536, 2214, 2213, 3122	4.51866	471	6208	146	4.15275	3.49089e-17	9.18105e-15	4.59052e-15	4.57116e-14
KEGG_PATHWAY	hsa05323:Rheumatoid arthritis	31	3126, 3111, 3112, 942, 940, 10673, 3683, 3600, 6352, 4050, 6372, 3109, 537, 3108, 3576, 8600, 3113, 4314, 3115, 51561, 4312, 3117, 10312, 3119, 1514, 1513, 6387, 3689, 7097, 54, 3122	3.04519	471	6208	83	4.92283	7.74567e-14	2.03808e-11	6.79357e-12	1.01474e-10
KEGG_PATHWAY	hsa05140:Leishmaniasis	28	3126, 3111, 3112, 6772, 3684, 3676, 9103, 3109, 3108, 5777, 3113, 3115, 4689, 3117, 4688, 3119, 3717, 653361, 3689, 1378, 2215, 7097, 2212, 1535, 2214, 5594, 3122, 65108	2.75049	471	6208	68	5.42725	9.7146e-14	2.5549e-11	6.38722e-12	1.27209e-10
KEGG_PATHWAY	hsa05332:Graft-versus-host disease	19	3126, 3113, 3111, 3115, 3112, 3135, 3117, 942, 3119, 940, 355, 3002, 3107, 3106, 3109, 3108, 3134, 3105, 3122	1.8664	471	6208	30	8.34763	1.80134e-13	4.73606e-11	9.47209e-12	2.358e-10
KEGG_PATHWAY	hsa05152:Tuberculosis	44	3126, 3111, 841, 3112, 11151, 6772, 5993, 64581, 3684, 9902, 3929, 6850, 7421, 9103, 1520, 2207, 3109, 537, 3920, 3108, 1509, 3113, 3115, 51561, 3117, 637, 10312, 3119, 64127, 972, 3717, 929, 3689, 4261, 1378, 2215, 7096, 7097, 2212, 3587, 2214, 2213, 3122, 5594	4.3222	471	6208	170	3.41142	5.14806e-13	1.35395e-10	2.25658e-11	6.74116e-10
KEGG_PATHWAY	hsa04612:Antigen processing and presentation	27	3113, 3126, 920, 3111, 3115, 3112, 3117, 3135, 3119, 6891, 6892, 5993, 925, 6890, 972, 1514, 10437, 4261, 1520, 3107, 3106, 3109, 3108, 3134, 1508, 3105, 3122	2.65226	471	6208	70	5.08389	1.78632e-12	4.6981e-10	6.71156e-11	2.33914e-09
KEGG_PATHWAY	hsa05330:Allograft rejection	19	3126, 3113, 3111, 3115, 3112, 3135, 3117, 942, 3119, 940, 355, 3002, 3107, 3106, 3109, 3108, 3134, 3105, 3122	1.8664	471	6208	34	7.36556	3.44735e-12	9.06654e-10	1.13332e-10	4.51414e-09
KEGG_PATHWAY	hsa05416:Viral myocarditis	23	6444, 3126, 3113, 3111, 841, 5880, 3115, 3112, 637, 3117, 3135, 942, 3119, 940, 3683, 3689, 3107, 3106, 3109, 3108, 3134, 3105, 3122	2.25933	471	6208	53	5.71983	6.90521e-12	1.81608e-09	2.01787e-10	9.0421e-09
KEGG_PATHWAY	hsa04514:Cell adhesion molecules (CAMs)	36	3126, 920, 3111, 3112, 942, 29126, 214, 940, 6401, 3385, 925, 3683, 3684, 3676, 3107, 3106, 3109, 6614, 3108, 3134, 3105, 3113, 3115, 3117, 3135, 3119, 914, 57502, 6402, 7412, 6404, 4267, 3689, 6382, 5788, 3122	3.53635	471	6208	137	3.46348	6.19478e-11	1.62923e-08	1.62923e-09	8.11176e-08
KEGG_PATHWAY	hsa04940:Type I diabetes mellitus	19	3126, 3113, 3111, 3115, 3112, 3135, 3117, 942, 3119, 940, 355, 3002, 3107, 3106, 3109, 3108, 3134, 3105, 3122	1.8664	471	6208	39	6.42125	6.81887e-11	1.79336e-08	1.63033e-09	8.92898e-08
KEGG_PATHWAY	hsa04142:Lysosome	31	2720, 26088, 4125, 6556, 1075, 8763, 4758, 1522, 175, 8905, 1520, 537, 3920, 7805, 1509, 1508, 4074, 4864, 10312, 2799, 27074, 1514, 1513, 4891, 1512, 79158, 10577, 9516, 53, 54, 4668	3.04519	471	6208	119	3.43357	2.13977e-09	5.6276e-07	4.68967e-08	2.80193e-06
KEGG_PATHWAY	hsa05320:Autoimmune thyroid disease	19	3126, 3113, 3111, 3115, 3112, 3135, 3117, 942, 3119, 940, 355, 3002, 3107, 3106, 3109, 3108, 3134, 3105, 3122	1.8664	471	6208	47	5.32827	2.81835e-09	7.41227e-07	5.70174e-08	3.6905e-06
KEGG_PATHWAY	hsa04062:Chemokine signaling pathway	39	3627, 113, 6772, 6773, 1230, 2268, 3702, 57580, 6352, 6351, 6357, 6375, 6355, 6373, 6372, 729230, 7852, 3576, 3055, 5880, 5567, 3718, 1794, 3717, 6362, 4283, 6387, 1234, 5293, 6363, 2782, 1236, 653361, 2885, 58191, 5294, 10451, 4067, 5594	3.83104	471	6208	182	2.82439	4.96179e-09	1.30495e-06	9.32107e-08	6.49722e-06
KEGG_PATHWAY	hsa04650:Natural killer cell mediated cytotoxicity	30	7535, 10870, 5579, 5578, 8743, 962, 3683, 27040, 6850, 8795, 3455, 2207, 5777, 5880, 637, 3937, 355, 5293, 7305, 5336, 3689, 2885, 3002, 2215, 5294, 10451, 3932, 2214, 4068, 5594	2.94695	471	6208	117	3.37961	6.09722e-09	1.60357e-06	1.06905e-07	7.98402e-06
KEGG_PATHWAY	hsa04064:NF-kappa B signaling pathway	25	7535, 10673, 330, 27040, 6351, 3929, 6357, 6850, 4050, 8600, 5328, 3576, 695, 597, 29760, 23643, 6387, 7412, 929, 6363, 5336, 472, 7128, 4067, 3932	2.4558	471	6208	84	3.92276	6.25349e-09	1.64467e-06	1.02792e-07	8.18865e-06
KEGG_PATHWAY	hsa04380:Osteoclast differentiation	31	1436, 6772, 6773, 6850, 9103, 3455, 1540, 8600, 695, 29760, 4689, 4688, 1513, 11006, 3937, 7305, 5293, 653361, 5336, 2885, 10288, 2215, 54, 2212, 5294, 1535, 1536, 3932, 2214, 2213, 5594	3.04519	471	6208	131	3.11904	2.40551e-08	6.32648e-06	3.72147e-07	3.1499e-05
KEGG_PATHWAY	hsa04672:Intestinal immune network for IgA production	17	3126, 3113, 3111, 3115, 3112, 3117, 942, 3119, 940, 10673, 3600, 3676, 6387, 7852, 3109, 3108, 3122	1.66994	471	6208	44	5.09245	5.18162e-08	1.36276e-05	7.57093e-07	6.78508e-05
KEGG_PATHWAY	hsa05340:Primary immunodeficiency	15	7535, 695, 920, 29760, 3561, 6891, 915, 5993, 925, 916, 6890, 4261, 3932, 5788, 3575	1.47348	471	6208	34	5.81491	5.702e-08	1.49961e-05	7.89277e-07	7.46649e-05
KEGG_PATHWAY	hsa05164:Influenza A	32	3126, 3111, 3627, 3112, 5579, 5578, 6772, 6773, 8743, 5611, 6352, 8795, 29108, 3455, 3109, 3108, 3576, 114548, 3113, 3115, 3117, 3119, 834, 3717, 4938, 355, 5293, 4261, 51284, 5294, 3122, 5594	3.14342	471	6208	165	2.55621	1.57214e-06	0.000413388	2.06735e-05	0.00205862
KEGG_PATHWAY	hsa04666:Fc gamma R-mediated phagocytosis	21	5880, 5579, 5578, 27040, 1794, 4082, 5293, 6850, 653361, 5336, 10095, 2212, 5294, 4067, 10451, 5788, 2213, 65108, 3055, 3635, 5594	2.06287	471	6208	84	3.29512	2.86338e-06	0.000752787	3.58598e-05	0.00374939
KEGG_PATHWAY	hsa04670:Leukocyte transendothelial migration	25	5880, 4313, 4689, 5579, 4688, 5578, 3683, 3702, 3684, 83593, 7412, 3676, 6387, 4267, 5293, 7070, 653361, 5336, 3689, 7852, 399, 1535, 5294, 1536, 10451	2.4558	471	6208	115	2.86532	3.6715e-06	0.00096514	4.38902e-05	0.00480754
KEGG_PATHWAY	hsa05321:Inflammatory bowel disease (IBD)	17	3594, 3126, 3113, 3111, 3115, 51561, 3112, 3117, 6772, 3561, 3119, 64127, 50615, 3109, 3108, 7097, 3122	1.66994	471	6208	61	3.67324	7.5281e-06	0.00197794	8.60788e-05	0.00985724
KEGG_PATHWAY	hsa05166:HTLV-I infection	40	3126, 3111, 3112, 113, 3561, 3560, 3683, 3600, 7474, 6513, 3107, 3106, 3109, 701, 3108, 3134, 3105, 706, 3113, 3115, 3117, 3135, 3119, 5567, 915, 916, 3718, 9232, 7412, 94241, 5293, 3689, 472, 2535, 894, 5294, 3932, 4085, 896, 3122	3.92927	471	6208	249	2.11734	8.13484e-06	0.00213718	8.91406e-05	0.0106517
KEGG_PATHWAY	hsa04060:Cytokine-cytokine receptor interaction	37	9966, 1436, 3627, 3561, 3560, 10673, 1230, 8743, 944, 3600, 1439, 50615, 6352, 6351, 6357, 4050, 6355, 6373, 7424, 3455, 729230, 7852, 3575, 3576, 8600, 3594, 51561, 939, 4283, 6387, 355, 1234, 9180, 6363, 1236, 58191, 3587	3.63458	471	6208	222	2.19674	8.28151e-06	0.00217568	8.7118e-05	0.0108437
KEGG_PATHWAY	hsa05133:Pertussis	18	51561, 23643, 834, 3684, 3394, 717, 929, 716, 713, 3689, 712, 715, 6372, 29108, 3659, 3576, 114548, 5594	1.76817	471	6208	69	3.43838	9.79465e-06	0.00257269	9.90723e-05	0.0128249
KEGG_PATHWAY	hsa05145:Toxoplasmosis	24	3113, 3126, 3111, 841, 3115, 3112, 240, 3117, 3119, 6772, 330, 23643, 3717, 1234, 5293, 4261, 3910, 3109, 3108, 7097, 5294, 3587, 3122, 5594	2.35756	471	6208	114	2.77484	1.06223e-05	0.00278977	0.000103464	0.0139084
KEGG_PATHWAY	hsa04620:Toll-like receptor signaling pathway	22	841, 3627, 942, 6772, 23643, 929, 1513, 6352, 4283, 6351, 5293, 3929, 6696, 6373, 3455, 7096, 51284, 7097, 5294, 51311, 3576, 5594	2.1611	471	6208	100	2.8997	1.3487e-05	0.00354081	0.000126674	0.0176591
KEGG_PATHWAY	hsa05310:Asthma	11	3126, 3113, 3111, 3115, 3112, 3117, 3119, 2207, 3109, 3108, 3122	1.08055	471	6208	27	5.36982	1.46304e-05	0.00384042	0.000132674	0.0191561
KEGG_PATHWAY	hsa05162:Measles	25	3561, 6772, 3560, 6773, 940, 8743, 8795, 3455, 915, 916, 3718, 6504, 3717, 9134, 355, 4938, 5293, 7128, 894, 51284, 7097, 5294, 4068, 896, 2213	2.4558	471	6208	130	2.53471	3.26673e-05	0.00855483	0.000286347	0.0427678
KEGG_PATHWAY	hsa05168:Herpes simplex infection	30	3126, 3111, 841, 3112, 6772, 6773, 6891, 6890, 3600, 983, 6352, 3455, 3107, 3106, 3109, 3108, 3134, 29992, 3105, 3113, 3115, 3135, 3117, 3119, 972, 3717, 4938, 355, 7097, 3122	2.94695	471	6208	173	2.28563	3.39203e-05	0.00888152	0.000287739	0.0444079
KEGG_PATHWAY	hsa04664:Fc epsilon RI signaling pathway	16	695, 5880, 5579, 5578, 27040, 3937, 5293, 6850, 5336, 2885, 2207, 5294, 4067, 10451, 3635, 5594	1.57171	471	6208	66	3.19526	8.95593e-05	0.0232799	0.000735828	0.11721
KEGG_PATHWAY	hsa05322:Systemic lupus erythematosus	21	3126, 3113, 3111, 3115, 3112, 3117, 942, 3119, 940, 9555, 717, 716, 713, 712, 715, 2215, 3109, 3108, 2212, 2214, 3122	2.06287	471	6208	106	2.61122	0.00010785	0.0279676	0.000859212	0.141133
KEGG_PATHWAY	hsa04662:B cell receptor signaling pathway	16	27071, 695, 5880, 29760, 118788, 5293, 6850, 5336, 2885, 5294, 5777, 4067, 10451, 2213, 3635, 5594	1.57171	471	6208	69	3.05634	0.000153095	0.039467	0.00118362	0.200285
KEGG_PATHWAY	hsa04512:ECM-receptor interaction	17	1292, 1290, 1281, 1284, 3371, 2335, 961, 3381, 3161, 3676, 6696, 1277, 7058, 3910, 1289, 6382, 1278	1.66994	471	6208	84	2.66748	0.000465558	0.115268	0.00349303	0.607912
KEGG_PATHWAY	hsa04141:Protein processing in endoplasmic reticulum	26	10525, 10130, 6184, 9601, 10970, 10952, 6400, 55741, 23480, 5611, 56886, 6185, 10483, 6748, 6747, 6745, 7184, 51465, 10802, 10808, 26270, 23471, 30001, 5034, 79139, 91319	2.55403	471	6208	166	2.06441	0.00064502	0.156078	0.00470266	0.841337
KEGG_PATHWAY	hsa04621:NOD-like receptor signaling pathway	13	6352, 841, 4671, 29108, 22900, 7128, 330, 64127, 834, 7184, 5594, 3576, 114548	1.27701	471	6208	55	3.11538	0.000668969	0.16138	0.0047454	0.872448
KEGG_PATHWAY	hsa05146:Amoebiasis	19	1290, 1281, 1284, 5579, 5578, 2769, 2335, 5567, 3684, 929, 5293, 3689, 1277, 3910, 1289, 7097, 1278, 5294, 3576	1.8664	471	6208	106	2.36254	0.000892142	0.209222	0.00615827	1.16193
KEGG_PATHWAY	hsa04640:Hematopoietic cell lineage	16	3126, 920, 1436, 931, 951, 914, 915, 925, 916, 290, 3684, 929, 3676, 1378, 3575, 3122	1.57171	471	6208	82	2.5718	0.00107859	0.2471	0.00725109	1.40319
KEGG_PATHWAY	hsa04611:Platelet activation	21	695, 1281, 1290, 113, 3710, 5567, 8673, 3937, 5293, 6850, 5336, 1277, 2207, 1289, 1278, 2212, 5294, 83706, 4067, 10125, 5594	2.06287	471	6208	126	2.19674	0.00113718	0.258624	0.00745328	1.47888
KEGG_PATHWAY	hsa05110:Vibrio cholerae infection	12	11015, 9601, 10312, 5579, 5336, 5578, 10952, 11014, 5567, 537, 23480, 30001	1.17878	471	6208	51	3.10129	0.00123142	0.276795	0.00787281	1.60053
KEGG_PATHWAY	hsa04660:T cell receptor signaling pathway	18	7535, 920, 940, 915, 925, 916, 3702, 27040, 3937, 5293, 2885, 5777, 5294, 3932, 10451, 5788, 10125, 5594	1.76817	471	6208	103	2.30338	0.0016985	0.36051	0.0105884	2.2014
KEGG_PATHWAY	hsa04115:p53 signaling pathway	13	841, 637, 6241, 983, 9134, 55240, 355, 9133, 64393, 472, 894, 891, 896	1.27701	471	6208	66	2.59615	0.00350462	0.602807	0.021244	4.49312
KEGG_PATHWAY	hsa04630:Jak-STAT signaling pathway	21	3594, 51561, 6772, 3561, 6773, 3560, 3600, 3718, 1439, 3717, 50615, 9180, 5293, 2885, 3455, 894, 5777, 5294, 3587, 3575, 896	2.06287	471	6208	141	1.96305	0.00445206	0.69072	0.0263181	5.67536
KEGG_PATHWAY	hsa04510:Focal adhesion	27	1292, 1290, 5579, 5578, 2335, 330, 3381, 3676, 7424, 1289, 64098, 1281, 5880, 1284, 3371, 5293, 6696, 2885, 1277, 7058, 894, 3910, 1278, 5294, 10451, 896, 5594	2.65226	471	6208	202	1.76175	0.00497748	0.730812	0.0287421	6.32515
KEGG_PATHWAY	hsa05205:Proteoglycans in cancer	25	7291, 406991, 4313, 10855, 3059, 5579, 5578, 3710, 5567, 2335, 7474, 1514, 355, 5293, 5336, 2885, 4060, 2535, 6382, 7097, 5294, 5777, 5329, 5328, 5594	2.4558	471	6208	194	1.69851	0.0110282	0.945878	0.0614344	13.516
KEGG_PATHWAY	hsa04610:Complement and coagulation cascades	12	717, 716, 728, 713, 712, 1378, 715, 2153, 629, 5329, 5265, 5328	1.17878	471	6208	67	2.36068	0.0110954	0.946838	0.0605251	13.593
KEGG_PATHWAY	hsa05134:Legionellosis	10	929, 841, 4671, 3689, 1378, 29108, 7097, 834, 3684, 3576	0.982318	471	6208	53	2.48688	0.0167904	0.988361	0.0886045	19.8867
KEGG_PATHWAY	hsa05144:Malaria	9	7412, 3689, 1378, 6401, 7058, 6382, 7097, 3683, 3576	0.884086	471	6208	47	2.52392	0.0232383	0.997937	0.116334	26.5001
KEGG_PATHWAY	hsa05223:Non-small cell lung cancer	10	5293, 6789, 5579, 5336, 2885, 5578, 27436, 5294, 83593, 5594	0.982318	471	6208	56	2.35365	0.0234975	0.998077	0.1154	26.7551
KEGG_PATHWAY	hsa05143:African trypanosomiasis	7	7412, 355, 5579, 5578, 6401, 3910, 3620	0.687623	471	6208	32	2.88323	0.0305413	0.999713	0.14519	33.3795
KEGG_PATHWAY	hsa04210:Apoptosis	10	841, 355, 5293, 637, 8795, 472, 330, 8743, 5294, 1439	0.982318	471	6208	62	2.12588	0.0422554	0.999988	0.192846	43.1835
