# Supplementary material for: Effects of rheumatoid arthritis associated transcriptional changes on osteoclast differentiation network in the synovium
Source: PeerJ. 2018 Oct 11;6:e5743. doi: 10.7717/peerj.5743 (PMC6186409; doi:10.7717/peerj.5743)
Supplement: Supplemental Information 6 — The KEGG pathway term name along with the KEGG pathway identifier is listed in column B. The “Count” in column C denotes the number of downregulated genes which belong to the KEGG pathway term. The Entrez ID of these downregulated genes are provided in column D. The parameter in column E represents the percentage of downregulated genes that are part of the KEGG pathway term. “List Total” denotes the total number of downregulated genes which are part of the KEGG pathway database. “Population Total” represents the total number of genes that belong to the KEGG Pathway database. “Population Hits” signifies the number of the “Population Total” genes which are part of the KEGG pathway term. The “Fold.Enrichment” column is the proportion of “Count”/“List Total” to “Population Hits”/“Population Total.” The “PValue” is the EASE score which represents the significance of obtaining “count” genes in the “List Total” for the given KEGG pathway term which has “Population Hits” genes in the background “Population Total.” The columns termed as “Bonferroni,” “Benjamini” and “FDR” represent the adjusted Pvalue to control the effect of multiple testing. [file peerj-06-5743-s006.xlsx]

## Sheet: Sheet1
Category	Term	Count	Genes	X.	List.Total	Pop.Total	Pop.Hits	Fold.Enrichment	PValue	Bonferroni	Benjamini	FDR
KEGG_PATHWAY	hsa04923:Regulation of lipolysis in adipocytes	14	5140, 2167, 5743, 5733, 8660, 3991, 4886, 2770, 5346, 108, 3667, 11145, 5592, 11343	1.56775	379	6208	55	4.16944	1.79136e-05	0.00452193	0.00452193	0.0233127
KEGG_PATHWAY	hsa05205:Proteoglycans in cancer	27	4660, 5781, 2318, 1956, 3339, 868, 3316, 288, 7042, 287, 8322, 7422, 2247, 22800, 5829, 2066, 11211, 2065, 858, 5727, 2719, 2260, 6385, 1634, 1839, 7078, 4609	3.02352	379	6208	194	2.27968	0.000105156	0.0262551	0.0132149	0.136778
KEGG_PATHWAY	hsa00071:Fatty acid degradation	10	125, 2180, 126, 3033, 128, 3030, 124, 10455, 33, 38	1.11982	379	6208	43	3.80929	0.000925946	0.208933	0.0751505	1.19847
KEGG_PATHWAY	hsa05200:Pathways in cancer	39	3725, 1910, 23236, 7704, 1956, 5332, 5733, 2034, 868, 3908, 2770, 7042, 8817, 8322, 7422, 2247, 108, 367, 7048, 624, 1287, 11211, 596, 7039, 2308, 5743, 652, 1902, 5468, 5727, 2260, 185, 2258, 4088, 3912, 4792, 1163, 4609, 6934	4.3673	379	6208	387	1.65069	0.00200584	0.398295	0.119264	2.57944
KEGG_PATHWAY	hsa04152:AMPK signaling pathway	17	2308, 2309, 5105, 9370, 8660, 5468, 3991, 948, 3953, 6319, 5523, 2194, 5209, 3952, 5563, 3667, 81617	1.9037	379	6208	121	2.30131	0.00256251	0.477509	0.121755	3.28433
KEGG_PATHWAY	hsa04520:Adherens junction	12	25945, 8976, 5792, 1956, 4008, 4088, 10580, 10810, 7048, 5787, 2260, 6934	1.34378	379	6208	70	2.80799	0.00308238	0.542074	0.122058	3.93837
KEGG_PATHWAY	hsa04920:Adipocytokine signaling pathway	12	2180, 3953, 5781, 5563, 3952, 32, 5105, 3667, 9370, 8660, 4792, 948	1.34378	379	6208	70	2.80799	0.00308238	0.542074	0.122058	3.93837
KEGG_PATHWAY	hsa00350:Tyrosine metabolism	8	125, 126, 128, 4128, 316, 124, 8639, 2184	0.895857	379	6208	35	3.74399	0.00446875	0.677975	0.149453	5.66261
KEGG_PATHWAY	hsa03320:PPAR signaling pathway	11	2180, 6319, 4023, 2167, 5346, 5105, 9370, 10580, 33, 5468, 948	1.2318	379	6208	66	2.72999	0.00612222	0.788532	0.176515	7.68169
KEGG_PATHWAY	hsa04068:FoxO signaling pathway	17	2308, 1956, 2309, 5105, 10365, 8660, 847, 664, 23710, 7042, 4616, 1647, 5563, 4088, 3667, 7048, 604	1.9037	379	6208	133	2.09368	0.0065784	0.811722	0.169342	8.23167
KEGG_PATHWAY	hsa04270:Vascular smooth muscle contraction	15	59, 23236, 4660, 10266, 800, 5332, 10398, 2977, 4638, 108, 185, 94274, 72, 4882, 5592	1.67973	379	6208	111	2.21351	0.00710532	0.835371	0.165069	8.86317
KEGG_PATHWAY	hsa00982:Drug metabolism - cytochrome P450	10	125, 126, 128, 4128, 316, 124, 4257, 2327, 2949, 4259	1.11982	379	6208	58	2.82413	0.00780253	0.862177	0.164865	9.6926
KEGG_PATHWAY	hsa04350:TGF-beta signaling pathway	12	7042, 657, 3397, 4088, 3400, 10468, 1634, 652, 7048, 130399, 4609, 653	1.34378	379	6208	81	2.42666	0.00949175	0.910443	0.182148	11.6733
KEGG_PATHWAY	hsa04022:cGMP-PKG signaling pathway	19	1910, 5140, 23236, 5332, 8660, 477, 10398, 5350, 2770, 150, 2977, 4638, 185, 108, 3667, 624, 4772, 4882, 5592	2.12766	379	6208	163	1.90932	0.00985448	0.918369	0.175299	12.0934
KEGG_PATHWAY	hsa00980:Metabolism of xenobiotics by cytochrome P450	10	125, 126, 128, 124, 2052, 1646, 1645, 4257, 2949, 4259	1.11982	379	6208	64	2.55937	0.0146502	0.976101	0.234104	17.4766
KEGG_PATHWAY	hsa04910:Insulin signaling pathway	16	5140, 2308, 5792, 5577, 5105, 868, 10580, 8660, 3991, 5507, 2872, 8835, 2194, 32, 5563, 3667	1.79171	379	6208	135	1.94133	0.0167396	0.986032	0.247783	19.7253
KEGG_PATHWAY	hsa04550:Signaling pathways regulating pluripotency of stem cells	16	11211, 657, 3397, 652, 130399, 2260, 463, 8322, 3976, 2247, 3977, 4088, 3400, 9314, 4609, 6926	1.79171	379	6208	136	1.92705	0.0178067	0.989387	0.247313	20.8518
KEGG_PATHWAY	hsa01212:Fatty acid metabolism	8	2180, 6319, 3033, 2194, 3030, 201562, 33, 38	0.895857	379	6208	46	2.84869	0.0200441	0.99404	0.260169	23.1666
KEGG_PATHWAY	hsa05206:MicroRNAs in cancer	17	596, 2065, 10253, 5743, 1956, 8660, 54541, 7042, 5292, 7168, 7422, 3667, 7078, 23414, 4609, 6935, 8434	1.9037	379	6208	151	1.8441	0.0207848	0.995078	0.255633	23.9191
KEGG_PATHWAY	hsa00640:Propanoate metabolism	6	3030, 8803, 32, 4329, 79611, 38	0.671892	379	6208	28	3.50999	0.0250878	0.998385	0.287037	28.1574
KEGG_PATHWAY	hsa04512:ECM-receptor interaction	11	7060, 3679, 6385, 9899, 3339, 1287, 22801, 3912, 5649, 3908, 948	1.2318	379	6208	84	2.14499	0.0304849	0.999603	0.324049	33.1651
KEGG_PATHWAY	hsa00380:Tryptophan metabolism	7	3033, 4128, 3030, 316, 847, 11185, 38	0.783875	379	6208	40	2.86649	0.0324071	0.99976	0.327596	34.8694
KEGG_PATHWAY	hsa04310:Wnt signaling pathway	15	3725, 11211, 23236, 4040, 23500, 5332, 6423, 6422, 8322, 2239, 4772, 6424, 4609, 64321, 6934	1.67973	379	6208	134	1.83358	0.0326973	0.999778	0.317712	35.1232
KEGG_PATHWAY	hsa04010:MAPK signaling pathway	24	3725, 3306, 4137, 1956, 3303, 2318, 1326, 2260, 7042, 4616, 2872, 8817, 5494, 2247, 1647, 51776, 1649, 2258, 22800, 7048, 4772, 4915, 4609, 1846	2.68757	379	6208	252	1.55999	0.0327475	0.99978	0.306673	35.167
KEGG_PATHWAY	hsa04510:Focal adhesion	20	3725, 4660, 596, 2318, 1956, 55742, 858, 5649, 10398, 3908, 7060, 80310, 4638, 7422, 3679, 1287, 22801, 3912, 5829, 83660	2.23964	379	6208	202	1.62178	0.0379012	0.999943	0.334562	39.5218
KEGG_PATHWAY	hsa00830:Retinol metabolism	8	125, 126, 128, 316, 124, 54884, 56603, 9249	0.895857	379	6208	53	2.47244	0.0402291	0.999969	0.340013	41.399
KEGG_PATHWAY	hsa00062:Fatty acid elongation	5	79993, 3033, 3030, 10965, 201562	0.55991	379	6208	22	3.72272	0.0413598	0.999977	0.337028	42.2912
KEGG_PATHWAY	hsa04024:cAMP signaling pathway	19	5142, 3725, 5140, 5144, 5733, 3991, 5727, 477, 10398, 5350, 4886, 8843, 2770, 5348, 108, 22800, 4772, 4792, 6662	2.12766	379	6208	192	1.62093	0.0437522	0.999988	0.342436	44.1378
KEGG_PATHWAY	hsa05204:Chemical carcinogenesis	9	125, 126, 128, 5743, 124, 2052, 4257, 2949, 4259	1.00784	379	6208	66	2.23363	0.0457402	0.999993	0.344952	45.6306
