# Supplementary material for: Effects of rheumatoid arthritis associated transcriptional changes on osteoclast differentiation network in the synovium
Source: PeerJ. 2018 Oct 11;6:e5743. doi: 10.7717/peerj.5743 (PMC6186409; doi:10.7717/peerj.5743)
Supplement: Supplemental Information 8 — The process pathways are highlighted in blue and the signaling pathways are highlighted in pink. The pathways belonging to category of “metabolism” or the ones that lack protein-protein interactions in the KEGG database are white rows. The KEGG pathway identifier and the name are listed in column A and B respectively. Column C and D contain the information about the total number of genes that belong to each of the KEGG pathway term. Of the total genes, information about the ones that are assayed in the microarray data analysis is provided in column E and F. The information about the upregulated and downregulated genes in each pathway is provided in the columns G-J. [file peerj-06-5743-s008.xlsx]

## Sheet: Sheet1
pathways	pathway names	pathway genes from KEGG	# pathway genes from KEGG	Pathway genes measured by microarray	# Pathway genes measured by microarray	Downregulated pathway genes	# Downregulated pathway genes	Upregulated pathway genes	# Upregulated pathway genes
hsa04923	Regulation of lipolysis in adipocytes	7252, 1081, 7253, 153, 154, 155, 2778, 107, 108, 109, 196883, 111, 112, 113, 114, 115, 5566, 5567, 5568, 4881, 5592, 5593, 5346, 3991, 57104, 51099, 11343, 2167, 364, 3630, 3643, 3667, 8660, 8471, 5290, 5293, 5291, 5295, 5296, 8503, 207, 208, 10000, 5140, 11145, 5742, 5743, 134, 5733, 4852, 4886, 2770, 2773, 2771	54	7252, 1081, 7253, 153, 154, 155, 2778, 107, 108, 109, 196883, 111, 112, 113, 114, 115, 5566, 5567, 5568, 4881, 5592, 5593, 5346, 3991, 57104, 51099, 11343, 2167, 3630, 3643, 3667, 8660, 8471, 5290, 5293, 5291, 5295, 5296, 8503, 207, 208, 10000, 5140, 11145, 5742, 5743, 134, 5733, 4852, 4886, 2770, 2773, 2771	53	108, 5592, 5346, 3991, 11343, 2167, 3667, 8660, 5140, 11145, 5743, 5733, 4886, 2770	14	113, 5567, 5293	3
hsa00071	Fatty acid degradation	39, 38, 30, 10449, 3032, 3033, 3030, 1962, 1892, 8310, 51, 35, 34, 33, 36, 37, 2639, 23305, 2182, 2180, 51703, 2181, 23205, 81616, 1374, 1375, 126129, 1376, 1632, 10455, 1579, 284541, 124, 125, 126, 131, 127, 128, 130, 217, 224, 219, 501, 223	44	39, 38, 30, 10449, 3032, 3033, 3030, 1962, 1892, 8310, 51, 35, 34, 33, 36, 37, 2639, 23305, 2182, 2180, 51703, 2181, 23205, 81616, 1374, 1375, 126129, 1376, 1632, 10455, 1579, 124, 125, 126, 131, 127, 128, 130, 217, 224, 219, 501, 223	43	38, 3033, 3030, 33, 2180, 10455, 124, 125, 126, 128	10	51703	1
hsa04152	AMPK signaling pathway	6885, 6794, 51719, 81617, 92335, 55437, 3952, 3953, 10645, 148, 9370, 51094, 79602, 5562, 5563, 5564, 5565, 5571, 53632, 51422, 5207, 5208, 5209, 5210, 2203, 8789, 5213, 5214, 5211, 3172, 2538, 57818, 92579, 5105, 5106, 200186, 1385, 10488, 90993, 64764, 84699, 148327, 9586, 10891, 1994, 595, 890, 8900, 29904, 101930123, 1938, 2308, 2309, 23411, 6517, 2998, 2997, 3991, 3156, 6720, 2194, 31, 6319,…	121	6885, 6794, 51719, 81617, 92335, 55437, 3952, 3953, 10645, 148, 9370, 51094, 79602, 5562, 5563, 5564, 5565, 5571, 53632, 51422, 5207, 5208, 5209, 5210, 2203, 8789, 5213, 5214, 5211, 3172, 2538, 57818, 92579, 5105, 5106, 200186, 1385, 10488, 90993, 64764, 84699, 148327, 9586, 10891, 1994, 595, 890, 8900, 101930123, 1938, 2308, 2309, 23411, 6517, 2998, 2997, 3991, 3156, 6720, 2194, 31, 6319, 79966,…	120	81617, 3952, 3953, 9370, 5563, 5209, 5105, 2308, 2309, 3991, 2194, 6319, 32, 5523, 948, 3667, 8660, 5468	18	2203, 5293	2
hsa04520	Adherens junction	5818, 5819, 25945, 81607, 56288, 6714, 9855, 998, 5879, 5880, 5881, 7454, 8976, 8826, 10458, 8936, 10163, 10810, 4301, 4008, 117178, 10580, 87, 81, 7414, 7082, 999, 1500, 1499, 29119, 1495, 1496, 60, 71, 387, 5797, 5787, 5792, 5770, 5777, 5795, 1457, 1459, 283106, 1460, 6932, 83439, 6934, 51176, 3480, 3643, 4233, 1956, 2064, 2260, 2534, 7525, 5594, 5595, 6591, 6615, 7046, 7048, 4087, 4088, 4089, …	72	5818, 5819, 25945, 81607, 56288, 6714, 9855, 998, 5879, 5880, 5881, 7454, 8976, 8826, 10458, 8936, 10163, 10810, 4301, 4008, 117178, 10580, 87, 81, 7414, 7082, 999, 1500, 1499, 29119, 1495, 1496, 60, 387, 5797, 5787, 5792, 5770, 5777, 5795, 1457, 1459, 1460, 6932, 83439, 6934, 51176, 3480, 3643, 4233, 1956, 2064, 2260, 2534, 7525, 5594, 5595, 6591, 6615, 7046, 7048, 4087, 4088, 4089, 1387, 2033, …	70	25945, 8976, 10810, 4008, 10580, 5787, 5792, 6934, 1956, 2260, 7048, 4088	12	5880, 5777, 5795, 6932, 51176, 5594	6
hsa04920	Adipocytokine signaling pathway	7124, 7132, 8717, 7133, 7186, 2475, 5599, 5602, 5601, 1147, 3551, 8517, 4792, 4793, 4794, 4790, 5970, 9021, 3667, 8660, 8471, 207, 208, 10000, 948, 23305, 2182, 2180, 51703, 2181, 23205, 81616, 5588, 3952, 3953, 3717, 6774, 5443, 5562, 5563, 5564, 5565, 5571, 53632, 51422, 181, 4852, 10891, 5105, 5106, 2538, 57818, 92579, 5781, 5465, 6256, 6257, 6258, 9370, 51094, 79602, 6794, 10645, 32, 1374, 13…	69	7124, 7132, 8717, 7133, 7186, 2475, 5599, 5602, 5601, 1147, 3551, 8517, 4792, 4793, 4794, 4790, 5970, 9021, 3667, 8660, 8471, 207, 208, 10000, 948, 23305, 2182, 2180, 51703, 2181, 23205, 81616, 5588, 3952, 3953, 3717, 6774, 5443, 5562, 5563, 5564, 5565, 5571, 53632, 51422, 181, 4852, 10891, 5105, 5106, 2538, 57818, 92579, 5781, 5465, 6256, 6257, 6258, 9370, 51094, 79602, 6794, 10645, 32, 1374, 13…	69	4792, 3667, 8660, 948, 2180, 3952, 3953, 5563, 5105, 5781, 9370, 32	12	51703, 3717, 6513	3
hsa00350	Tyrosine metabolism	2805, 2806, 6898, 259307, 3242, 3081, 2954, 2184, 7299, 7054, 1638, 7306, 1644, 1621, 5409, 1312, 4129, 4128, 8639, 314, 221, 222, 220, 218, 124, 125, 126, 131, 127, 128, 130, 7173, 316, 81889, 4282	35	2805, 2806, 6898, 259307, 3242, 3081, 2954, 2184, 7299, 7054, 1638, 7306, 1644, 1621, 5409, 1312, 4129, 4128, 8639, 314, 221, 222, 220, 218, 124, 125, 126, 131, 127, 128, 130, 7173, 316, 81889, 4282	35	2184, 4128, 8639, 124, 125, 126, 128, 316	8	4282	1
hsa03320	PPAR signaling pathway	948, 376497, 10999, 11001, 10998, 28965, 2168, 2169, 2170, 2167, 2171, 2172, 2173, 5465, 6256, 6257, 6258, 5467, 5468, 335, 336, 345, 116519, 5360, 9415, 6319, 79966, 1581, 1582, 10062, 1593, 1622, 4023, 23305, 2182, 2180, 51703, 2181, 23205, 81616, 4973, 1962, 30, 6342, 8310, 51, 8309, 1374, 1375, 126129, 1376, 33, 34, 51129, 10580, 5346, 123, 729359, 440503, 9370, 4312, 7350, 3611, 5170, 7316, …	72	948, 376497, 10999, 11001, 10998, 28965, 2168, 2169, 2170, 2167, 2171, 2172, 2173, 5465, 6256, 6257, 6258, 5467, 5468, 335, 336, 345, 116519, 5360, 9415, 6319, 79966, 1581, 1582, 10062, 1593, 1622, 4023, 23305, 2182, 2180, 51703, 2181, 23205, 81616, 4973, 1962, 30, 6342, 8310, 51, 8309, 1374, 1375, 126129, 1376, 33, 34, 51129, 10580, 5346, 123, 729359, 440503, 9370, 4312, 7350, 3611, 5170, 7316, …	71	948, 2167, 5468, 6319, 4023, 2180, 33, 10580, 5346, 123, 729359, 9370, 5105	13	5360, 51703, 51129, 4312, 4199	5
hsa04068	FoxO signaling pathway	7040, 7042, 7043, 7046, 7048, 4089, 4087, 4088, 6794, 5562, 5563, 5564, 5565, 5571, 53632, 51422, 51701, 6502, 4193, 80854, 1387, 2033, 23411, 7874, 6517, 5599, 5602, 5601, 6789, 3479, 3480, 3630, 3643, 3667, 8660, 8471, 5290, 5293, 5291, 5295, 5296, 8503, 5170, 1147, 3551, 5728, 207, 208, 10000, 6446, 10110, 23678, 100533105, 2308, 2309, 4303, 100132074, 2911, 9456, 9455, 9454, 116986, 1454, 102…	132	7040, 7042, 7043, 7046, 7048, 4089, 4087, 4088, 6794, 5562, 5563, 5564, 5565, 5571, 53632, 51422, 51701, 6502, 4193, 80854, 1387, 2033, 23411, 7874, 6517, 5599, 5602, 5601, 6789, 3479, 3480, 3630, 3643, 3667, 8660, 8471, 5290, 5293, 5291, 5295, 5296, 8503, 5170, 1147, 3551, 5728, 207, 208, 10000, 6446, 10110, 100533105, 2308, 2309, 4303, 100132074, 2911, 9456, 9455, 9454, 116986, 1454, 102800317,…	131	7042, 7048, 4088, 5563, 3667, 8660, 2308, 2309, 1956, 1647, 4616, 604, 664, 23710, 847, 5105, 10365	17	6789, 5293, 2885, 5594, 891, 9133, 894, 10018, 8743, 472, 3575	11
hsa04270	Vascular smooth muscle contraction	148, 147, 146, 185, 1909, 552, 553, 2776, 2767, 8399, 26279, 30814, 50487, 64600, 81579, 84647, 5319, 5322, 5320, 391013, 123745, 5321, 8681, 100137049, 8605, 283748, 255189, 8398, 1579, 284541, 3778, 157855, 3779, 10242, 27094, 27345, 775, 776, 778, 779, 810, 805, 808, 801, 163688, 51806, 91860, 4638, 85366, 91807, 340156, 140465, 4637, 10398, 23236, 5330, 5331, 5332, 3708, 3709, 3710, 5578, 557…	121	148, 147, 146, 185, 1909, 552, 553, 2776, 2767, 26279, 30814, 50487, 64600, 81579, 84647, 5319, 5322, 5320, 5321, 100137049, 8605, 283748, 255189, 8398, 1579, 3778, 157855, 3779, 10242, 27094, 27345, 775, 776, 778, 779, 810, 801, 163688, 51806, 91860, 4638, 85366, 91807, 340156, 140465, 4637, 10398, 23236, 5330, 5331, 5332, 3708, 3709, 3710, 5578, 5579, 5582, 5580, 5581, 5583, 5588, 369, 673, 589…	113	185, 4638, 10398, 23236, 5332, 800, 59, 72, 94274, 4660, 10266, 108, 4882, 5592, 2977, 4629	16	5320, 3778, 3710, 5578, 5579, 5594, 113, 5567	8
hsa00982	Drug metabolism - cytochrome P450	1565, 107987478, 1559, 1576, 2326, 2327, 2330, 2328, 2329, 1557, 1555, 1577, 221357, 2939, 2941, 119391, 2948, 2953, 2952, 2947, 4257, 4259, 2950, 2944, 2949, 4258, 2938, 2946, 2940, 9446, 653689, 373156, 27306, 124, 125, 126, 131, 127, 128, 130, 221, 222, 220, 218, 4129, 4128, 316, 10941, 79799, 7367, 10720, 54490, 54578, 54657, 54658, 54659, 7365, 54600, 7364, 54575, 54576, 54579, 7366, 54577, …	70	1565, 1559, 1576, 2326, 2327, 2330, 2328, 2329, 1557, 1555, 1577, 2941, 119391, 2948, 2953, 2952, 2947, 4257, 4259, 2950, 2944, 2949, 4258, 2938, 2946, 2940, 9446, 373156, 27306, 124, 125, 126, 131, 127, 128, 130, 221, 222, 220, 218, 4129, 4128, 316, 10941, 79799, 7367, 10720, 54490, 54578, 54658, 7364, 54575, 54576, 7366, 7363, 1544, 1571, 1558, 1548	59	2327, 4257, 4259, 2949, 27306, 124, 125, 126, 128, 4128, 316	11	9446	1
hsa04350	TGF-beta signaling pathway	8646, 9241, 4681, 100532736, 7057, 1634, 10637, 7044, 10468, 650, 652, 653, 654, 655, 656, 353500, 8200, 392255, 151449, 268, 4052, 7040, 7042, 7043, 3624, 3625, 3626, 83729, 4838, 659, 269, 7048, 92, 93, 657, 658, 90, 7046, 91, 130399, 25805, 4086, 4090, 4093, 4087, 4088, 4089, 4091, 4092, 57154, 64750, 9372, 9765, 3397, 3398, 3399, 3400, 5933, 1874, 1875, 7027, 1387, 2033, 6667, 7050, 60436, 46…	84	8646, 9241, 4681, 100532736, 7057, 1634, 10637, 10468, 650, 652, 653, 654, 655, 656, 353500, 8200, 268, 4052, 7040, 7042, 7043, 3624, 3625, 3626, 83729, 4838, 659, 269, 7048, 92, 93, 657, 658, 90, 7046, 91, 130399, 25805, 4086, 4090, 4093, 4087, 4088, 4089, 4091, 4092, 57154, 64750, 9372, 9765, 3397, 3398, 3399, 3400, 5933, 1874, 1875, 7027, 1387, 2033, 6667, 7050, 60436, 4609, 1030, 5308, 9978, …	81	1634, 10468, 652, 653, 7042, 7048, 657, 130399, 4088, 3397, 3400, 4609	12	5594	1
hsa04022	cGMP-PKG signaling pathway	185, 1909, 1910, 148, 147, 146, 150, 151, 152, 2776, 2767, 2768, 10672, 7225, 5530, 5532, 5533, 5534, 5535, 4205, 4207, 100271849, 4208, 4209, 4772, 4773, 4775, 4776, 6722, 2626, 4879, 4881, 4882, 5592, 5593, 775, 776, 778, 779, 3778, 157855, 3779, 10242, 27094, 27345, 6546, 6543, 6547, 476, 477, 478, 480, 23439, 481, 482, 483, 486, 490, 492, 493, 491, 5997, 9569, 2969, 23236, 5330, 5331, 5332, 3…	163	185, 1909, 1910, 148, 147, 146, 150, 151, 152, 2776, 2767, 2768, 10672, 7225, 5530, 5532, 5533, 5534, 5535, 4205, 100271849, 4208, 4209, 4772, 4773, 4775, 4776, 6722, 2626, 4879, 4881, 4882, 5592, 5593, 775, 776, 778, 779, 3778, 157855, 3779, 10242, 27094, 27345, 6546, 6543, 6547, 476, 477, 478, 480, 23439, 481, 482, 483, 486, 490, 492, 493, 491, 5997, 9569, 2969, 23236, 5330, 5331, 5332, 3708, 3…	160	185, 1910, 150, 4772, 4882, 5592, 477, 23236, 5332, 5350, 4638, 10398, 108, 5140, 2977, 624, 2770, 3667, 8660	19	3778, 6546, 3710, 489, 113, 5294, 5594	7
hsa00980	Metabolism of xenobiotics by cytochrome P450	1543, 1559, 1576, 1545, 221357, 2939, 2941, 119391, 2948, 2953, 2952, 2947, 4257, 4259, 2950, 2944, 2949, 4258, 2938, 2946, 2940, 9446, 653689, 373156, 27306, 2052, 1555, 6822, 1544, 1548, 1571, 1572, 29785, 1645, 27294, 1553, 1565, 107987478, 3290, 873, 874, 10941, 79799, 7367, 10720, 54490, 54578, 54657, 54658, 54659, 7365, 54600, 7364, 54575, 54576, 54579, 7366, 54577, 7363, 574537, 1577, 8574…	74	1543, 1559, 1576, 1545, 2941, 119391, 2948, 2953, 2952, 2947, 4257, 4259, 2950, 2944, 2949, 4258, 2938, 2946, 2940, 9446, 373156, 27306, 2052, 1555, 6822, 1544, 1548, 1571, 1572, 29785, 1645, 27294, 1553, 1565, 3290, 873, 874, 10941, 79799, 7367, 10720, 54490, 54578, 54658, 7364, 54575, 54576, 7366, 7363, 1577, 8574, 22977, 221, 222, 220, 218, 124, 125, 126, 131, 127, 128, 130	63	4257, 4259, 2949, 27306, 2052, 1645, 124, 125, 126, 128	10	9446	1
hsa04910	Insulin signaling pathway	3630, 3643, 3667, 8660, 8471, 5295, 5296, 8503, 5290, 5293, 5291, 5170, 207, 208, 10000, 2932, 2998, 2997, 5499, 5500, 5501, 5506, 5507, 5509, 79660, 90673, 89801, 5260, 5261, 5257, 5256, 5255, 810, 805, 808, 801, 163688, 51806, 91860, 5836, 5837, 5834, 5140, 5566, 5567, 5568, 5573, 5576, 5577, 5575, 3991, 5590, 5584, 6517, 2319, 10211, 10603, 10580, 23624, 867, 868, 1398, 1399, 2889, 23433, 2326…	138	3630, 3643, 3667, 8660, 8471, 5295, 5296, 8503, 5290, 5293, 5291, 5170, 207, 208, 10000, 2932, 2998, 2997, 5499, 5500, 5501, 5506, 5507, 5509, 79660, 90673, 89801, 5260, 5261, 5257, 5256, 5255, 810, 801, 163688, 51806, 91860, 5836, 5837, 5834, 5140, 5566, 5567, 5568, 5573, 5576, 5577, 5575, 3991, 5590, 5584, 6517, 2319, 10211, 10603, 10580, 23624, 867, 868, 1398, 1399, 2889, 23433, 23265, 9322, 6…	135	3667, 8660, 5507, 5140, 5577, 3991, 10580, 868, 32, 2194, 5563, 2308, 5105, 2872, 8835, 5792	16	5293, 5567, 3101, 2203, 2885, 5594	6
hsa04550	Signaling pathways regulating pluripotency of stem cells	3976, 3977, 3572, 3716, 3717, 3718, 6774, 9314, 6657, 4609, 2885, 5604, 5605, 5594, 5595, 5290, 5293, 5291, 5295, 5296, 8503, 207, 208, 10000, 6926, 79923, 3624, 3625, 3626, 83729, 4838, 91, 130399, 92, 93, 4087, 4088, 652, 657, 658, 90, 659, 4086, 4090, 4093, 4089, 3397, 3398, 3399, 3400, 1852, 5600, 6300, 5603, 1432, 7471, 7472, 7482, 7473, 89780, 54361, 7474, 81029, 7475, 7476, 7477, 7478, 747…	139	3976, 3977, 3572, 3716, 3717, 3718, 6774, 9314, 6657, 4609, 2885, 5604, 5605, 5594, 5595, 5290, 5293, 5291, 5295, 5296, 8503, 207, 208, 10000, 6926, 79923, 3624, 3625, 3626, 83729, 4838, 91, 130399, 92, 93, 4087, 4088, 652, 657, 658, 90, 659, 4086, 4090, 4093, 4089, 3397, 3398, 3399, 3400, 1852, 5600, 6300, 5603, 1432, 7471, 7472, 7482, 54361, 7474, 81029, 7475, 7476, 7477, 7478, 7479, 7483, 7484…	134	3976, 3977, 9314, 4609, 6926, 130399, 4088, 652, 657, 3397, 3400, 8322, 11211, 2247, 2260, 463	16	3717, 3718, 2885, 5594, 5293, 7474, 2535	7
hsa01212	Fatty acid metabolism	10449, 126129, 1374, 1375, 1376, 1892 , 1962, 201562, 2180, 2181, 2182, 2194, 23205, 23305, 27349, 30, 3030, 3032, 3033, 31, 33, 34, 35, 36, 37 , 38, 39 , 3992, 401494, 51, 51102, 51144, 51495, 51703, 54898 , 54995, 5538, 55825, 60481 , 6319, 79071, 79966, 81616, 8310, 9200, 9374, 9415, 9524	48	10449, 126129, 1374, 1375, 1376, 1962, 201562, 2180, 2181, 2182, 2194, 23205, 23305, 27349, 30, 3030, 3032, 3033, 31, 33, 34, 35, 36, 38, 401494, 51, 51102, 51144, 51495, 51703, 54995, 5538, 55825, 6319, 79071, 79966, 81616, 8310, 9200, 9415, 9524	41	201562, 2180, 2194, 3030, 3033, 33, 38, 6319	8	401494, 51703	2
hsa00640	Propanoate metabolism	84532, 55902, 79611, 593, 594, 1629, 1738, 34, 3030, 1962, 1892, 26275, 31, 32, 23417, 18, 5095, 5096, 55862, 84693, 4594, 8802, 8801, 8803, 4329, 160287, 92483, 3939, 3945, 3948, 39, 38	32	84532, 55902, 79611, 593, 594, 1629, 1738, 34, 3030, 1962, 1892, 26275, 31, 32, 23417, 18, 5095, 5096, 55862, 84693, 4594, 8802, 8801, 8803, 4329, 160287, 92483, 3939, 3945, 3948, 39, 38	32	79611, 3030, 32, 8803, 4329, 38	6		0
hsa04512	ECM-receptor interaction	1277, 1278, 1280, 1284, 1286, 1288, 1282, 1287, 1285, 1291, 1292, 1293, 131873, 256076, 1297, 1298, 1299, 284217, 3908, 3909, 3911, 3910, 3912, 3913, 3914, 22798, 3915, 3918, 10319, 1101, 5649, 7057, 1311, 7058, 7059, 7060, 2335, 6696, 7448, 3371, 63923, 7143, 7148, 7450, 3381, 375790, 3339, 3672, 3673, 3674, 3675, 3676, 3678, 3655, 3679, 8516, 3680, 8515, 22801, 3685, 3688, 3690, 3691, 3693, 369…	82	1277, 1278, 1280, 1284, 1286, 1288, 1282, 1287, 1285, 1291, 1292, 1293, 131873, 256076, 1297, 1298, 1299, 284217, 3908, 3909, 3911, 3910, 3912, 3913, 3914, 22798, 3915, 3918, 10319, 1101, 5649, 7057, 1311, 7058, 7059, 7060, 2335, 6696, 3371, 63923, 7143, 7148, 7450, 3381, 375790, 3339, 3672, 3673, 3674, 3675, 3676, 3678, 3655, 3679, 8516, 3680, 8515, 22801, 3685, 3688, 3690, 3691, 3693, 3695, 369…	79	1287, 3908, 3912, 5649, 7060, 3339, 3679, 22801, 6385, 9899, 948	11	1277, 1278, 1284, 1292, 3910, 7058, 2335, 6696, 3371, 3381, 3676, 6382, 961, 3161	14
hsa00380	Tryptophan metabolism	6999, 3620, 169355, 125061, 8564, 8942, 23498, 130013, 55753, 4967, 2639, 3030, 1962, 1892, 3033, 39, 38, 56267, 883, 51166, 121278, 7166, 1644, 4129, 4128, 217, 224, 219, 501, 223, 316, 438, 15, 1543, 1544, 1545, 11185, 259307, 26, 847	40	6999, 3620, 169355, 125061, 8564, 8942, 23498, 130013, 55753, 4967, 2639, 3030, 1962, 1892, 3033, 39, 38, 56267, 883, 51166, 121278, 7166, 1644, 4129, 4128, 217, 224, 219, 501, 223, 316, 438, 15, 1543, 1544, 1545, 11185, 259307, 26, 847	40	3030, 3033, 38, 4128, 316, 11185, 847	7	6999, 3620, 8564, 8942	4
hsa04310	Wnt signaling pathway	64840, 7471, 7472, 7482, 7473, 89780, 54361, 7474, 81029, 7475, 7476, 7477, 7478, 7479, 7483, 7484, 7480, 80326, 7481, 51384, 9350, 147111, 11197, 5176, 50964, 22943, 27123, 27121, 6422, 6423, 6424, 6425, 8321, 8324, 2535, 7976, 8322, 7855, 8325, 8323, 11211, 8326, 4041, 4040, 25805, 1454, 102800317, 1857, 1856, 1855, 10023, 23401, 1457, 1459, 283106, 1460, 85407, 85409, 80319, 59343, 2932, 1499,…	143	64840, 7471, 7472, 7482, 54361, 7474, 81029, 7475, 7476, 7477, 7478, 7479, 7483, 7484, 7480, 80326, 7481, 51384, 9350, 147111, 11197, 5176, 50964, 22943, 27123, 27121, 6422, 6423, 6424, 6425, 8321, 8324, 2535, 7976, 8322, 7855, 8323, 11211, 8326, 4041, 4040, 25805, 1454, 102800317, 1857, 1856, 1855, 10023, 23401, 1457, 1459, 1460, 85407, 85409, 80319, 59343, 2932, 1499, 8312, 8313, 324, 10297, 14…	138	6422, 6423, 6424, 8322, 11211, 4040, 6934, 64321, 4609, 3725, 2239, 23500, 23236, 5332, 4772, 4088	16	7474, 2535, 1452, 6932, 51176, 894, 896, 5567, 5880, 5578, 5579	11
hsa04010	MAPK signaling pathway	773, 774, 775, 776, 777, 778, 8913, 8912, 8911, 779, 781, 9254, 55799, 93589, 782, 783, 784, 785, 786, 10369, 10368, 27092, 27091, 59285, 59284, 59283, 5566, 5567, 5568, 5578, 5579, 5582, 2768, 55970, 5530, 5532, 5533, 5534, 5535, 5923, 5924, 10125, 10235, 25780, 115727, 9693, 4763, 5921, 5922, 5906, 5908, 4803, 627, 4908, 4909, 1950, 2246, 2247, 2248, 2249, 8822, 2251, 2252, 2253, 2254, 2255, 22…	255	773, 774, 775, 776, 777, 778, 8913, 8912, 8911, 779, 781, 9254, 55799, 93589, 782, 783, 784, 785, 786, 10369, 10368, 27092, 27091, 59285, 59284, 59283, 5566, 5567, 5568, 5578, 5579, 5582, 2768, 55970, 5530, 5532, 5533, 5534, 5535, 5923, 5924, 10125, 10235, 25780, 115727, 9693, 4763, 5921, 5922, 5906, 5908, 4803, 627, 4908, 4909, 1950, 2246, 2247, 2248, 2249, 8822, 2251, 2252, 2253, 2254, 2255, 22…	252	2247, 2258, 8817, 4915, 1956, 2260, 22800, 2872, 4609, 4137, 7042, 7048, 1647, 4616, 1326, 51776, 2318, 4772, 3725, 1649, 5494, 1846, 3303, 3306	24	5567, 5578, 5579, 10125, 2885, 5594, 6195, 355, 929, 5880, 9448, 6789, 5778	13
hsa04510	Focal adhesion	1277, 1278, 1280, 1284, 1286, 1288, 1282, 1287, 1285, 1291, 1292, 1293, 131873, 256076, 1297, 1298, 1299, 284217, 3908, 3909, 3911, 3910, 3912, 3913, 3914, 22798, 3915, 3918, 10319, 1101, 5649, 7057, 1311, 7058, 7059, 7060, 2335, 6696, 7448, 3371, 63923, 7143, 7148, 7450, 3381, 3672, 3673, 3674, 3675, 3676, 3678, 3655, 3679, 8516, 3680, 8515, 22801, 3685, 3688, 3690, 3691, 3693, 3694, 3695, 3696,…	199	1277, 1278, 1280, 1284, 1286, 1288, 1282, 1287, 1285, 1291, 1292, 1293, 131873, 256076, 1297, 1298, 1299, 284217, 3908, 3909, 3911, 3910, 3912, 3913, 3914, 22798, 3915, 3918, 10319, 1101, 5649, 7057, 1311, 7058, 7059, 7060, 2335, 6696, 3371, 63923, 7143, 7148, 7450, 3381, 3672, 3673, 3674, 3675, 3676, 3678, 3655, 3679, 8516, 3680, 8515, 22801, 3685, 3688, 3690, 3691, 3693, 3695, 3696, 5154, 5155,…	194	1287, 3908, 3912, 5649, 7060, 3679, 22801, 80310, 7422, 1956, 10398, 4660, 4638, 83660, 2318, 5829, 55742, 3725, 858, 596	20	1277, 1278, 1284, 1292, 3910, 7058, 2335, 6696, 3371, 3381, 3676, 7424, 64098, 5578, 5579, 5293, 10451, 5880, 2885, 5594, 894, 896, 330	23
hsa00830	Retinol metabolism	53630, 124, 125, 126, 131, 127, 128, 130, 9249, 10901, 728635, 317749, 10170, 50700, 157506, 51109, 145226, 8608, 195814, 8630, 9227, 8694, 158835, 8228, 6121, 5959, 316, 8854, 216, 1592, 56603, 340665, 1543, 1544, 1548, 1555, 1558, 1559, 1562, 29785, 1576, 1577, 1551, 100861540, 1579, 10941, 79799, 7367, 10720, 54490, 54578, 54657, 54658, 54659, 7365, 54600, 7364, 54575, 54576, 54579, 7366, 5457…	65	53630, 124, 125, 126, 131, 127, 128, 130, 9249, 10901, 10170, 50700, 157506, 51109, 145226, 8608, 195814, 8630, 9227, 8694, 8228, 6121, 5959, 316, 8854, 216, 1592, 56603, 1543, 1544, 1548, 1555, 1558, 1559, 1562, 29785, 1576, 1577, 100861540, 1579, 10941, 79799, 7367, 10720, 54490, 54578, 54658, 7364, 54575, 54576, 7366, 7363, 54884	53	124, 125, 126, 128, 9249, 316, 56603, 54884	8	10170	1
hsa00062	Fatty acid elongation	10449, 3032, 3033, 3030, 1892, 51102, 5538, 9374, 64834, 54898, 83401, 6785, 60481, 79071, 79993, 51144, 201562, 9200, 401494, 51495, 9524, 122970, 10965, 641371, 11332	25	10449, 3032, 3033, 3030, 1892, 51102, 5538, 54898, 83401, 6785, 60481, 79071, 79993, 51144, 201562, 9200, 401494, 51495, 9524, 122970, 10965, 11332	22	3033, 3030, 79993, 201562, 10965	5	401494, 11332	2
hsa04024	cAMP signaling pathway	2488, 153, 1812, 1816, 135, 3360, 3362, 5732, 117, 7434, 7253, 4158, 2740, 2696, 139760, 2492, 4881, 2778, 4852, 51738, 154, 3350, 3351, 3352, 3354, 3355, 1128, 1129, 1813, 2550, 9568, 134, 1909, 4886, 6751, 6752, 6755, 27198, 338442, 8843, 2867, 56670, 5733, 5021, 2693, 2770, 2773, 2771, 107, 108, 109, 196883, 111, 112, 113, 114, 115, 55811, 610, 10021, 1259, 1260, 1261, 1262, 1258, 54714, 810, …	198	2488, 153, 1812, 1816, 3360, 3362, 5732, 117, 7434, 7253, 4158, 2740, 2696, 2492, 4881, 2778, 4852, 51738, 154, 3350, 3351, 3352, 3354, 3355, 1128, 1129, 1813, 2550, 9568, 134, 1909, 4886, 6751, 6752, 6755, 27198, 8843, 2867, 56670, 5733, 5021, 2693, 2770, 2773, 2771, 107, 108, 109, 196883, 111, 112, 113, 114, 115, 55811, 610, 10021, 1259, 1261, 1262, 1258, 54714, 810, 801, 163688, 51806, 91860, …	192	4886, 8843, 5733, 2770, 108, 22800, 3725, 5727, 4792, 6662, 4772, 3991, 10398, 5350, 477, 5348, 5140, 5142, 5144	19	113, 10451, 5880, 5293, 5594, 5567	6
