# Supplementary material for: Effects of rheumatoid arthritis associated transcriptional changes on osteoclast differentiation network in the synovium
Source: PeerJ. 2018 Oct 11;6:e5743. doi: 10.7717/peerj.5743 (PMC6186409; doi:10.7717/peerj.5743)
Supplement: Supplemental Information 10 — The highlighted clusters contain DEGs in the core network. The number and the official gene symbols of the genes corresponding to the proteins belonging to the protein clusters are listed in the columns named “#nodes” and “nodes.” The number of interactions (edges) among the proteins in the clusters are included in the column named “# edges.” The information about the number and the official gene symbols of the DEGs present in the clusters are provided in columns E-L. Among these, the details of DEGs which are part of the core ODP network are listed in columns M-R. [file peerj-06-5743-s010.xlsx]

## Sheet: Sheet1
Cluster	# nodes	nodes	# edges	# DEGs	DEGs	# upgenes	upgenes	# downgenes	downgenes	# core proteins	core proteins	# core DEGs	core DEGs	# core upgenes	core upgenes	# core downgenes	core downgenes
Cluster_1	6	HDAC1, AR, ESR1, SRC, NCOA1, NCOA3	9	1	AR	0	NA	1	AR	0	NA	0	NA	0	NA	0	NA
Cluster_2	9	NCOR2, NFKB1, NOTCH1, CDKN1A, PPARG, HDAC3, STAT1, EP300, STAT3	14	2	STAT1, PPARG	1	STAT1	1	PPARG	3	STAT1, PPARG, NFKB1	2	STAT1, PPARG	1	STAT1	1	PPARG
Cluster_3	5	LTBR, TNFRSF8, TRAF3, CD40, TRAF2	7	0	NA	0	NA	0	NA	1	TRAF2	0	NA	0	NA	0	NA
Cluster_4	8	TGFBR2, ENG, CEBPB, TGFB1, TGFBR1, SMARCA4, SP1, SMAD3	11	2	TGFBR2, SMAD3	0	NA	2	TGFBR2, SMAD3	3	TGFB1, TGFBR2, TGFBR1	1	TGFBR2	0	NA	1	TGFBR2
Cluster_5	9	CUL1, SHC1, FBXW11, ERBB2, SKP1, ERBB3, SOS1, CRK, CTNNB1	12	1	ERBB3	0	NA	1	ERBB3	0	NA	0	NA	0	NA	0	NA
Cluster_6	3	EGFR, SH3KBP1, PIK3R1	3	1	EGFR	0	NA	1	EGFR	1	PIK3R1	0	NA	0	NA	0	NA
Cluster_7	7	IKBKG, CASP8, BCL10, BIRC3, RIPK1, FADD, TRADD	9	2	CASP8, BIRC3	2	CASP8, BIRC3	0	NA	1	IKBKG	0	NA	0	NA	0	NA
Cluster_8	3	MAPKAP1, MTOR, RICTOR	3	0	NA	0	NA	0	NA	0	NA	0	NA	0	NA	0	NA
Cluster_9	3	STUB1, UBE2N, UBE2V1	3	0	NA	0	NA	0	NA	0	NA	0	NA	0	NA	0	NA
Cluster_10	7	NCF2, NCF4, NCF1, PARD6G, PRKCZ, RAC1, CYBA	9	4	NCF1, NCF2, NCF4, CYBA	4	NCF1, NCF2, NCF4, CYBA	0	NA	4	NCF2, NCF4, CYBA, RAC1	3	NCF2, NCF4, CYBA	3	NCF2, NCF4, CYBA	0	NA
Cluster_11	3	IL1R2, IL1B, IL1RAP	3	0	NA	0	NA	0	NA	1	IL1B	0	NA	0	NA	0	NA
Cluster_12	3	SHARPIN, RBCK1, RNF31	3	0	NA	0	NA	0	NA	0	NA	0	NA	0	NA	0	NA
Cluster_13	3	ITGAV, FN1, ITGB3	3	1	FN1	1	FN1	0	NA	1	ITGB3	0	NA	0	NA	0	NA
Cluster_14	3	IFNA2, IFNAR1, IFNAR2	3	1	IFNAR2	1	IFNAR2	0	NA	2	IFNAR1, IFNAR2	1	IFNAR2	1	IFNAR2	0	NA
Cluster_15	3	RELA, NR3C1, CREBBP	3	1	NR3C1	0	NA	1	NR3C1	1	RELA	0	NA	0	NA	0	NA
Cluster_16	3	PLCG1, SH3BP2, LAT	3	1	LAT	1	LAT	0	NA	0	NA	0	NA	0	NA	0	NA
Cluster_17	3	MYD88, IL1R1, TRAF6	3	0	NA	0	NA	0	NA	2	TRAF6, IL1R1	0	NA	0	NA	0	NA
Cluster_18	6	PTK2, MDM2, CBL, SUMO1, TP53, PTPN11	7	1	PTPN11	0	NA	1	PTPN11	0	NA	0	NA	0	NA	0	NA
Cluster_19	7	BRAF, MAP2K1, KSR1, MAPK8IP1, MAP3K1, MAPK8, MAP2K7	8	0	NA	0	NA	0	NA	3	MAPK8, MAP2K1, MAP2K7	0	NA	0	NA	0	NA
